# Supplementary material for: Telomere-to-telomere cattle genome assembly reveals novel introgressions and selection signatures associated with adaptation and energy metabolism
Source: Research Square preprint supplement (doi:10.21203/rs.3.rs-7664711/v1), 2025-10-08
Supplement: Supplementary file 2 [file 6d9da236dd2c3449be38f6b4.xlsx]

## Sheet: Table S1
Supplementary Table 1. Data used for the T2T-cattle1.0-SAAS assembly
Sample ID	Sequencing technology	Tissue	Sequencing depth (×)	Raw Sequence (bp)	Total Read
T2T-cattle1.0-SAAS	DNA-seq, NGS-Illumina	liver	67.5433	202629882300	675432941
T2T-cattle1.0-SAAS	DNA-seq, PacBio-HiFi	liver	89.8709	269612847957	179741190
T2T-cattle1.0-SAAS	HiC	liver	97.7697	293309196710	8.38026e+08
T2T-cattle1.0-SAAS	DNA-seq, ONT ultra-long	liver	149.289	447867180258	17792699
T2T-cattle1.0-SAAS	ChIP-seq (INPUT)	liver	/	7110429600	23701432
T2T-cattle1.0-SAAS	ChIP-seq (CENPA)	liver	/	10050890100	33502967
T2T-cattle1.0-Sire	DNA-seq, NGS-MGI	sperm	45.2212	135663715500	452212385
T2T-cattle1.0-Dam	DNA-seq, NGS-MGI	blood	27.6185	82855358700	276184529

## Sheet: Table S2
Supplementary Table 2. Genome assembly statistics at different stages
Assembly summary	HiFi primary assembly	After Hi-C anchor	T2T-cattle1.0-SAAS
Contig number	607	40	12
Contig N50 (bp)	88010774	93344918	112520574
Number of scaffolds	-	31	12
Scaffold N50 (bp)	-	106402381	112520574
Number of gaps	0	9	0
Gap length (bp)	0	1800	0
Number of chromosomes	-	31	31
Total bases (bp)	3370332087	3037711102	3048869979

## Sheet: Table S3
Supplementary Table 3. The 12 gaps in the chromosome-level scaffolds of T2T- cattle1.0-SAAS
Scaffold	Flank_start	Flank_end	Length (bp)
Chr04	126311229	126534424	223195
Chr07	14752029	15416251	664222
Chr11	10681532	11252825	571293
Chr12	16868974	17444268	575294
Chr14	1381640	1469418	87778
Chr18	57239448	57760496	521048
Chr19	12703255	13274822	571567
Chr27	8697895	8713485	15590
Chr29	1081944	1544430	462486
ChrX	39479187	40537310	1058123
ChrX	63614421	63755867	141446
ChrY	12351101	13245124	894023

## Sheet: Table S4
Supplementary Table 4. The assembly evalution on T2T-cattle1.0-SAAS by BUSCO
Type	Number	Percent (%)
Complete BUSCOs	12277	99.71
Complete and single-copy BUSCOs	12157	99.02
Complete and duplicated BUSCOs	85	0.69
Fragmented BUSCOs	22	0.18
Missing BUSCOs	13	0.11

## Sheet: Table S5
Supplementary Table 5. Number of telomeric repeat in T2T-cattle1.0-SAAS
Chromosome	5'telomere_start	5'telomere_end	3'telomere_start	3'telomere_end
Chr01	1	18012	164642035	164654034
Chr02	1	19225	148107504	148119503
Chr03	1	18000	136058734	136070733
Chr04	1	17999	127365222	127377221
Chr05	1	17999	140721998	140735082
Chr06	1	18486	133187696	133202087
Chr07	1	17999	125311550	125325000
Chr08	1	27483	126407360	126426250
Chr09	1	18215	121416586	121429873
Chr10	1	26484	112503596	112520574
Chr11	1	18486	117413728	117425727
Chr12	1	17999	106006348	106018347
Chr13	1	17999	89244270	89258978
Chr14	1	18197	93071774	93089079
Chr15	1	17999	92172023	92185008
Chr16	1	18245	94912736	94925796
Chr17	1	18834	82548607	82560606
Chr18	1	19081	72779297	72793721
Chr19	1	17999	76159310	76175762
Chr20	1	25704	89285085	89300596
Chr21	1	18246	85401792	85415799
Chr22	1	18193	74750231	74762230
Chr23	1	27600	67543089	67555088
Chr24	1	18899	74580001	74592674
Chr25	1	17339	48639987	48652870
Chr26	1	18005	60472075	60492331
Chr27	1	18041	55078985	55091681
Chr28	1	17971	59320683	59335283
Chr29	1	18215	56400164	56412121
ChrX	1	13686	158469164	158484717
ChrY	1	15748	58466721	58481208

## Sheet: Table S6
Supplementary Table 6. Estimated quality value (QV) and error rate for the Chromosomes of T2T-cattle1.0-SAAS
Chromosome ID	Length	QV	Error rate
Chr01	164654014	68.6485	1.36506e-07
Chr02	148119483	73.2257	4.75807e-08
Chr03	136070713	67.7838	1.6658e-07
Chr04	127377201	73.304	4.67304e-08
Chr05	140735062	69.1674	1.21133e-07
Chr06	133202067	69.4567	1.13326e-07
Chr07	125324980	62.732	5.33093e-07
Chr08	126426230	68.6535	1.36349e-07
Chr09	121429853	70.2633	9.41167e-08
Chr10	112520554	70.5748	8.76031e-08
Chr11	117425707	72.6488	5.43404e-08
Chr12	106018327	65.4826	2.82971e-07
Chr13	89258958	64.8897	3.24365e-07
Chr14	93089059	67.8057	1.6574e-07
Chr15	92184988	69.1766	1.20875e-07
Chr16	94925776	65.0721	3.11021e-07
Chr17	82560586	64.201	3.80097e-07
Chr18	72793701	58.9383	1.27695e-06
Chr19	76175742	57.1225	1.93979e-06
Chr20	89300576	65.0002	3.16215e-07
Chr21	85415779	65.4279	2.86554e-07
Chr22	74762210	56.6429	2.16628e-06
Chr23	67555068	67.7167	1.69174e-07
Chr24	74592654	62.6806	5.39441e-07
Chr25	48652850	63.2808	4.69803e-07
Chr26	60492311	65.2299	2.99921e-07
Chr27	55091661	63.7756	4.19217e-07
Chr28	59335263	69.3416	1.16369e-07
Chr29	56412101	64.6506	3.42717e-07
ChrX	158484697	67.717	1.69162e-07
ChrY	58481188	44.8208	3.29551e-05
Total	3048869979	60.2185	9.50931e-07

## Sheet: Table S7
Supplementary Table 7. The PURs of each chromosome
Chromosome	PUR (bp)
Chr01	7437275
Chr02	11078221
Chr03	13839371
Chr04	6641338
Chr05	19857927
Chr06	14322133
Chr07	13897531
Chr08	13592462
Chr09	16091195
Chr10	10654991
Chr11	10480200
Chr12	16820160
Chr13	5034269
Chr14	10041267
Chr15	7753551
Chr16	10421146
Chr17	8664222
Chr18	6161333
Chr19	12654496
Chr20	17351583
Chr21	15047848
Chr22	13547925
Chr23	14457623
Chr24	11592903
Chr25	6111640
Chr26	8502709
Chr27	9000884
Chr28	13183938
Chr29	4981403
ChrX	13136725

## Sheet: Table S8
Supplementary Table 8. The SDs in PURs
SD				PUR
Chromosome	Start	End	Length (bp)	Chromosome	Start	End	Length (bp)
Chr01	18799	65418	46619	Chr01	0	3919879	3919879
Chr01	66353	117738	51385	Chr01	0	3919879	3919879
Chr01	172336	186171	13835	Chr01	0	3919879	3919879
Chr01	294186	307689	13503	Chr01	0	3919879	3919879
Chr01	317460	328701	11241	Chr01	0	3919879	3919879
Chr01	404609	415712	11103	Chr01	0	3919879	3919879
Chr01	422982	434237	11255	Chr01	0	3919879	3919879
Chr01	465669	485024	19355	Chr01	0	3919879	3919879
Chr01	542934	572967	30033	Chr01	0	3919879	3919879
Chr01	599903	612709	12806	Chr01	0	3919879	3919879
Chr01	740128	796970	56842	Chr01	0	3919879	3919879
Chr01	883848	926785	42937	Chr01	0	3919879	3919879
Chr01	1041005	8203637	7162632	Chr01	6601828	6602219	391
Chr01	1041005	8203637	7162632	Chr01	6607123	6615261	8138
Chr01	1041005	8203637	7162632	Chr01	7505587	7514646	9059
Chr01	1041005	8203637	7162632	Chr01	8046377	8052075	5698
Chr01	1041005	8203637	7162632	Chr01	6617762	6637536	19774
Chr01	1041005	8203637	7162632	Chr01	6719455	6765569	46114
Chr01	1041005	8203637	7162632	Chr01	7239938	7335713	95775
Chr01	1041005	8203637	7162632	Chr01	7356310	7369505	13195
Chr01	1041005	8203637	7162632	Chr01	7372470	7373141	671
Chr01	1041005	8203637	7162632	Chr01	7388174	7403508	15334
Chr01	1041005	8203637	7162632	Chr01	7415089	7430780	15691
Chr01	1041005	8203637	7162632	Chr01	7436147	7462092	25945
Chr01	1041005	8203637	7162632	Chr01	6345694	6599317	253623
Chr01	1041005	8203637	7162632	Chr01	6770094	6919542	149448
Chr01	1041005	8203637	7162632	Chr01	6945388	7082980	137592
Chr01	1041005	8203637	7162632	Chr01	7087744	7219771	132027
Chr01	1041005	8203637	7162632	Chr01	7470355	7483735	13380
Chr01	1041005	8203637	7162632	Chr01	7667615	7765762	98147
Chr01	1041005	8203637	7162632	Chr01	0	3919879	3919879
Chr01	1041005	8203637	7162632	Chr01	3932731	6258855	2326124
Chr01	1041005	8203637	7162632	Chr01	6279299	6343966	64667
Chr01	24466611	24481910	15299	Chr01	24462765	24472833	10068
Chr01	151486350	151532880	46530	Chr01	151517940	151519879	1939
Chr01	163835393	163885887	50494	Chr01	163834494	163856612	22118
Chr01	164552368	164642034	89666	Chr01	164627130	164654034	26904
Chr02	19881	63890	44009	Chr02	0	3523414	3523414
Chr02	174393	185606	11213	Chr02	0	3523414	3523414
Chr02	370226	388397	18171	Chr02	0	3523414	3523414
Chr02	510243	521424	11181	Chr02	0	3523414	3523414
Chr02	526081	537274	11193	Chr02	0	3523414	3523414
Chr02	604966	622369	17403	Chr02	0	3523414	3523414
Chr02	695062	720273	25211	Chr02	0	3523414	3523414
Chr02	732971	776197	43226	Chr02	0	3523414	3523414
Chr02	824351	825998	1647	Chr02	0	3523414	3523414
Chr02	882135	4717974	3835839	Chr02	4122697	4124288	1591
Chr02	882135	4717974	3835839	Chr02	4244469	4253347	8878
Chr02	882135	4717974	3835839	Chr02	4396376	4403748	7372
Chr02	882135	4717974	3835839	Chr02	4408062	4409222	1160
Chr02	882135	4717974	3835839	Chr02	4436431	4436870	439
Chr02	882135	4717974	3835839	Chr02	4492559	4493959	1400
Chr02	882135	4717974	3835839	Chr02	4605765	4606072	307
Chr02	882135	4717974	3835839	Chr02	4660321	4663878	3557
Chr02	882135	4717974	3835839	Chr02	4665653	4667721	2068
Chr02	882135	4717974	3835839	Chr02	4702732	4712495	9763
Chr02	882135	4717974	3835839	Chr02	4714538	4715393	855
Chr02	882135	4717974	3835839	Chr02	3942143	3952567	10424
Chr02	882135	4717974	3835839	Chr02	4125801	4157672	31871
Chr02	882135	4717974	3835839	Chr02	4210230	4222977	12747
Chr02	882135	4717974	3835839	Chr02	4223678	4240478	16800
Chr02	882135	4717974	3835839	Chr02	4267403	4284234	16831
Chr02	882135	4717974	3835839	Chr02	4339377	4341842	2465
Chr02	882135	4717974	3835839	Chr02	4614613	4629743	15130
Chr02	882135	4717974	3835839	Chr02	4631779	4639728	7949
Chr02	882135	4717974	3835839	Chr02	4644186	4659583	15397
Chr02	882135	4717974	3835839	Chr02	3530966	3564759	33793
Chr02	882135	4717974	3835839	Chr02	3582288	3918274	335986
Chr02	882135	4717974	3835839	Chr02	3961262	4093356	132094
Chr02	882135	4717974	3835839	Chr02	4717889	4726625	8736
Chr02	882135	4717974	3835839	Chr02	0	3523414	3523414
Chr02	882135	4717974	3835839	Chr02	4190416	4203594	13178
Chr02	7022123	7813330	791207	Chr02	7413091	7414216	1125
Chr02	7022123	7813330	791207	Chr02	6547007	7032780	485773
Chr02	7022123	7813330	791207	Chr02	7419013	7523592	104579
Chr02	7022123	7813330	791207	Chr02	7534291	7794812	260521
Chr02	7022123	7813330	791207	Chr02	7796223	8038646	242423
Chr02	7022123	7813330	791207	Chr02	7037396	7411388	373992
Chr02	9293524	11549867	2256343	Chr02	9152022	9293850	141828
Chr02	9293524	11549867	2256343	Chr02	10547256	10811828	264572
Chr02	9293524	11549867	2256343	Chr02	9320676	10544283	1223607
Chr02	9293524	11549867	2256343	Chr02	10817032	11660168	843136
Chr02	144465681	144547982	82301	Chr02	144544651	144544721	70
Chr03	18739	117901	99162	Chr03	0	3466259	3466259
Chr03	123119	157305	34186	Chr03	0	3466259	3466259
Chr03	159606	170779	11173	Chr03	0	3466259	3466259
Chr03	172270	351913	179643	Chr03	0	3466259	3466259
Chr03	359203	434102	74899	Chr03	0	3466259	3466259
Chr03	434491	445713	11222	Chr03	0	3466259	3466259
Chr03	465535	484890	19355	Chr03	0	3466259	3466259
Chr03	488340	499568	11228	Chr03	0	3466259	3466259
Chr03	542800	572835	30035	Chr03	0	3466259	3466259
Chr03	573046	585182	12136	Chr03	0	3466259	3466259
Chr03	587102	617635	30533	Chr03	0	3466259	3466259
Chr03	620589	714619	94030	Chr03	0	3466259	3466259
Chr03	744252	916505	172253	Chr03	0	3466259	3466259
Chr03	950975	7860566	6909591	Chr03	3513503	3521527	8024
Chr03	950975	7860566	6909591	Chr03	3582436	3583542	1106
Chr03	950975	7860566	6909591	Chr03	4446047	4450448	4401
Chr03	950975	7860566	6909591	Chr03	5738185	5739989	1804
Chr03	950975	7860566	6909591	Chr03	5742950	5748295	5345
Chr03	950975	7860566	6909591	Chr03	6877326	6877752	426
Chr03	950975	7860566	6909591	Chr03	3540564	3555790	15226
Chr03	950975	7860566	6909591	Chr03	3587737	3663152	75415
Chr03	950975	7860566	6909591	Chr03	4472157	4547147	74990
Chr03	950975	7860566	6909591	Chr03	5699373	5736149	36776
Chr03	950975	7860566	6909591	Chr03	5993567	6020505	26938
Chr03	950975	7860566	6909591	Chr03	6071141	6157498	86357
Chr03	950975	7860566	6909591	Chr03	6386009	6395717	9708
Chr03	950975	7860566	6909591	Chr03	7813404	7859421	46017
Chr03	950975	7860566	6909591	Chr03	3666546	3672998	6452
Chr03	950975	7860566	6909591	Chr03	5754234	5974016	219782
Chr03	950975	7860566	6909591	Chr03	6399994	6860726	460732
Chr03	950975	7860566	6909591	Chr03	0	3466259	3466259
Chr03	950975	7860566	6909591	Chr03	3681681	4437680	755999
Chr03	950975	7860566	6909591	Chr03	4550477	5689514	1139037
Chr03	950975	7860566	6909591	Chr03	6161591	6376531	214940
Chr03	950975	7860566	6909591	Chr03	6882806	7811070	928264
Chr03	9270109	10575468	1305359	Chr03	9640397	9697442	57045
Chr03	9270109	10575468	1305359	Chr03	9698154	10202092	503938
Chr03	9270109	10575468	1305359	Chr03	10211292	10586295	375003
Chr03	9270109	10575468	1305359	Chr03	8060538	9619834	1559296
Chr03	12097358	14504349	2406991	Chr03	12096921	12103909	6988
Chr03	12097358	14504349	2406991	Chr03	12251530	12254848	3318
Chr03	12097358	14504349	2406991	Chr03	12257548	12266229	8681
Chr03	12097358	14504349	2406991	Chr03	12457744	12459681	1937
Chr03	12097358	14504349	2406991	Chr03	12559764	12562873	3109
Chr03	12097358	14504349	2406991	Chr03	12634632	12637110	2478
Chr03	12097358	14504349	2406991	Chr03	12642147	12644716	2569
Chr03	12097358	14504349	2406991	Chr03	12700480	12702725	2245
Chr03	12097358	14504349	2406991	Chr03	12704951	12712500	7549
Chr03	12097358	14504349	2406991	Chr03	12747528	12762319	14791
Chr03	12097358	14504349	2406991	Chr03	12766062	12771823	5761
Chr03	12097358	14504349	2406991	Chr03	12915963	12922945	6982
Chr03	12097358	14504349	2406991	Chr03	12945996	12948524	2528
Chr03	12097358	14504349	2406991	Chr03	12949744	12952525	2781
Chr03	12097358	14504349	2406991	Chr03	12960619	12961462	843
Chr03	12097358	14504349	2406991	Chr03	12963584	12968018	4434
Chr03	12097358	14504349	2406991	Chr03	13015420	13020643	5223
Chr03	12097358	14504349	2406991	Chr03	13070417	13070807	390
Chr03	12097358	14504349	2406991	Chr03	13118137	13120916	2779
Chr03	12097358	14504349	2406991	Chr03	13163526	13166281	2755
Chr03	12097358	14504349	2406991	Chr03	13176917	13181538	4621
Chr03	12097358	14504349	2406991	Chr03	13185566	13187577	2011
Chr03	12097358	14504349	2406991	Chr03	13189260	13190487	1227
Chr03	12097358	14504349	2406991	Chr03	13192930	13203618	10688
Chr03	12097358	14504349	2406991	Chr03	13225589	13234669	9080
Chr03	12097358	14504349	2406991	Chr03	13241411	13253530	12119
Chr03	12097358	14504349	2406991	Chr03	13255265	13267149	11884
Chr03	12097358	14504349	2406991	Chr03	13274677	13277506	2829
Chr03	12097358	14504349	2406991	Chr03	13282772	13283185	413
Chr03	12097358	14504349	2406991	Chr03	13302965	13303415	450
Chr03	12097358	14504349	2406991	Chr03	13329078	13329496	418
Chr03	12097358	14504349	2406991	Chr03	13389010	13390928	1918
Chr03	12097358	14504349	2406991	Chr03	13395555	13398611	3056
Chr03	12097358	14504349	2406991	Chr03	13472012	13476026	4014
Chr03	12097358	14504349	2406991	Chr03	13478798	13479725	927
Chr03	12097358	14504349	2406991	Chr03	13487344	13490236	2892
Chr03	12097358	14504349	2406991	Chr03	13940004	13941240	1236
Chr03	12097358	14504349	2406991	Chr03	13973852	13974699	847
Chr03	12097358	14504349	2406991	Chr03	14471793	14479910	8117
Chr03	12097358	14504349	2406991	Chr03	12270814	12276452	5638
Chr03	12097358	14504349	2406991	Chr03	12373139	12398111	24972
Chr03	12097358	14504349	2406991	Chr03	12464353	12528883	64530
Chr03	12097358	14504349	2406991	Chr03	12531155	12557986	26831
Chr03	12097358	14504349	2406991	Chr03	12565823	12569217	3394
Chr03	12097358	14504349	2406991	Chr03	12592183	12613745	21562
Chr03	12097358	14504349	2406991	Chr03	12617728	12634063	16335
Chr03	12097358	14504349	2406991	Chr03	12649888	12673492	23604
Chr03	12097358	14504349	2406991	Chr03	12876815	12882078	5263
Chr03	12097358	14504349	2406991	Chr03	12884221	12902229	18008
Chr03	12097358	14504349	2406991	Chr03	12923384	12941996	18612
Chr03	12097358	14504349	2406991	Chr03	12943260	12944114	854
Chr03	12097358	14504349	2406991	Chr03	12954890	12960063	5173
Chr03	12097358	14504349	2406991	Chr03	12984785	12996500	11715
Chr03	12097358	14504349	2406991	Chr03	13000083	13009925	9842
Chr03	12097358	14504349	2406991	Chr03	13025038	13028157	3119
Chr03	12097358	14504349	2406991	Chr03	13033388	13069309	35921
Chr03	12097358	14504349	2406991	Chr03	13128178	13142291	14113
Chr03	12097358	14504349	2406991	Chr03	13287288	13292798	5510
Chr03	12097358	14504349	2406991	Chr03	13379340	13386643	7303
Chr03	12097358	14504349	2406991	Chr03	13404339	13421419	17080
Chr03	12097358	14504349	2406991	Chr03	13423762	13458294	34532
Chr03	12097358	14504349	2406991	Chr03	13580799	13616415	35616
Chr03	12097358	14504349	2406991	Chr03	13949215	13962344	13129
Chr03	12097358	14504349	2406991	Chr03	12169710	12231947	62237
Chr03	12097358	14504349	2406991	Chr03	12282323	12372686	90363
Chr03	12097358	14504349	2406991	Chr03	12400270	12455255	54985
Chr03	12097358	14504349	2406991	Chr03	12777314	12874359	97045
Chr03	12097358	14504349	2406991	Chr03	13083033	13113400	30367
Chr03	12097358	14504349	2406991	Chr03	13236868	13240448	3580
Chr03	12097358	14504349	2406991	Chr03	13491477	13577562	86085
Chr03	12097358	14504349	2406991	Chr03	13699748	13873634	173886
Chr03	12097358	14504349	2406991	Chr03	14114953	14467226	352273
Chr03	12097358	14504349	2406991	Chr03	12577647	12590987	13340
Chr03	12097358	14504349	2406991	Chr03	13621129	13654988	33859
Chr03	22539218	22721681	182463	Chr03	22569503	22720215	150712
Chr03	23189437	23289208	99771	Chr03	23198254	23198531	277
Chr03	23189437	23289208	99771	Chr03	23218159	23221224	3065
Chr03	23189437	23289208	99771	Chr03	23254652	23275522	20870
Chr03	26474358	26838194	363836	Chr03	26592694	26607000	14306
Chr03	26474358	26838194	363836	Chr03	26741594	26782468	40874
Chr03	31997201	32336720	339519	Chr03	32149770	32160611	10841
Chr03	31997201	32336720	339519	Chr03	32220236	32226105	5869
Chr03	31997201	32336720	339519	Chr03	32063443	32140425	76982
Chr03	35745943	36016903	270960	Chr03	35843450	35912886	69436
Chr03	35745943	36016903	270960	Chr03	35913768	35937103	23335
Chr03	36162699	36241385	78686	Chr03	36179667	36207475	27808
Chr03	69073372	69489135	415763	Chr03	69260120	69274943	14823
Chr03	133789108	134200589	411481	Chr03	134141925	134146090	4165
Chr03	133789108	134200589	411481	Chr03	134065894	134119855	53961
Chr03	135509332	136028735	519403	Chr03	135555388	135562371	6983
Chr03	135509332	136028735	519403	Chr03	135585507	135594082	8575
Chr03	135509332	136028735	519403	Chr03	135691114	135768800	77686
Chr03	135509332	136028735	519403	Chr03	135827590	136022202	194612
Chr04	17999	3692287	3674288	Chr04	2687137	2696250	9113
Chr04	17999	3692287	3674288	Chr04	3234911	3235614	703
Chr04	17999	3692287	3674288	Chr04	3236546	3238349	1803
Chr04	17999	3692287	3674288	Chr04	3051982	3092770	40788
Chr04	17999	3692287	3674288	Chr04	3192111	3208203	16092
Chr04	17999	3692287	3674288	Chr04	3260172	3263946	3774
Chr04	17999	3692287	3674288	Chr04	2709413	2988405	278992
Chr04	17999	3692287	3674288	Chr04	3268900	3286757	17857
Chr04	17999	3692287	3674288	Chr04	3291751	3662556	370805
Chr04	17999	3692287	3674288	Chr04	3663993	3670786	6793
Chr04	17999	3692287	3674288	Chr04	0	2671691	2671691
Chr04	17999	3692287	3674288	Chr04	3097897	3153348	55451
Chr04	14241416	14243785	2369	Chr04	14241368	14243783	2415
Chr04	99321579	99399884	78305	Chr04	99374331	99380637	6306
Chr04	99321579	99399884	78305	Chr04	99387040	99394445	7405
Chr04	110626183	110858510	232327	Chr04	110672885	110760714	87829
Chr04	110940064	111195172	255108	Chr04	110971491	110972667	1176
Chr04	110940064	111195172	255108	Chr04	111170690	111178503	7813
Chr04	110940064	111195172	255108	Chr04	111068762	111110918	42156
Chr04	111233243	111263214	29971	Chr04	111245882	111252607	6725
Chr04	118014902	118134366	119464	Chr04	118134356	118928257	793901
Chr04	118138804	118147939	9135	Chr04	118134356	118928257	793901
Chr04	118148004	118280158	132154	Chr04	118134356	118928257	793901
Chr04	118281906	118284684	2778	Chr04	118134356	118928257	793901
Chr04	118295425	118469096	173671	Chr04	118134356	118928257	793901
Chr04	118487020	118492713	5693	Chr04	118134356	118928257	793901
Chr04	118498981	118501866	2885	Chr04	118134356	118928257	793901
Chr04	118527545	118696944	169399	Chr04	118134356	118928257	793901
Chr04	118698970	118702021	3051	Chr04	118134356	118928257	793901
Chr04	118716879	118755810	38931	Chr04	118134356	118928257	793901
Chr04	118778645	118912959	134314	Chr04	118134356	118928257	793901
Chr04	118931403	118999752	68349	Chr04	118930759	119520331	589572
Chr04	119005350	119009478	4128	Chr04	118930759	119520331	589572
Chr04	119017374	119025903	8529	Chr04	118930759	119520331	589572
Chr04	119062030	119161057	99027	Chr04	118930759	119520331	589572
Chr04	119166932	119274761	107829	Chr04	118930759	119520331	589572
Chr04	119289775	119324619	34844	Chr04	118930759	119520331	589572
Chr04	119343448	119356725	13277	Chr04	118930759	119520331	589572
Chr04	119368294	119437653	69359	Chr04	118930759	119520331	589572
Chr04	119455940	119520181	64241	Chr04	118930759	119520331	589572
Chr04	119541112	119555187	14075	Chr04	119525820	119626164	100344
Chr04	119573196	119619306	46110	Chr04	119525820	119626164	100344
Chr04	119627971	119670062	42091	Chr04	119627398	119755415	128017
Chr04	119672497	119706487	33990	Chr04	119627398	119755415	128017
Chr04	119742491	119895749	153258	Chr04	119627398	119755415	128017
Chr04	126668712	127365221	696509	Chr04	127210977	127377221	166244
Chr04	126668712	127365221	696509	Chr04	126795448	127201356	405908
Chr05	20301	85256	64955	Chr05	0	1617402	1617402
Chr05	90206	109086	18880	Chr05	0	1617402	1617402
Chr05	112090	201030	88940	Chr05	0	1617402	1617402
Chr05	238049	258073	20024	Chr05	0	1617402	1617402
Chr05	268055	279276	11221	Chr05	0	1617402	1617402
Chr05	301933	331594	29661	Chr05	0	1617402	1617402
Chr05	439559	450968	11409	Chr05	0	1617402	1617402
Chr05	487023	498296	11273	Chr05	0	1617402	1617402
Chr05	500087	511226	11139	Chr05	0	1617402	1617402
Chr05	512432	532863	20431	Chr05	0	1617402	1617402
Chr05	671011	684941	13930	Chr05	0	1617402	1617402
Chr05	719281	2883469	2164188	Chr05	1635845	1751034	115189
Chr05	719281	2883469	2164188	Chr05	0	1617402	1617402
Chr05	719281	2883469	2164188	Chr05	1754906	4286287	2531381
Chr05	2898145	2914114	15969	Chr05	1754906	4286287	2531381
Chr05	2914405	2952476	38071	Chr05	1754906	4286287	2531381
Chr05	2952518	2963666	11148	Chr05	1754906	4286287	2531381
Chr05	2968265	2984208	15943	Chr05	1754906	4286287	2531381
Chr05	3005244	3021861	16617	Chr05	1754906	4286287	2531381
Chr05	3027145	3064293	37148	Chr05	1754906	4286287	2531381
Chr05	3228316	3268305	39989	Chr05	1754906	4286287	2531381
Chr05	3366107	3424571	58464	Chr05	1754906	4286287	2531381
Chr05	3561170	3572386	11216	Chr05	1754906	4286287	2531381
Chr05	3593194	3604431	11237	Chr05	1754906	4286287	2531381
Chr05	3644817	3676610	31793	Chr05	1754906	4286287	2531381
Chr05	3680423	20166781	16486358	Chr05	4287012	4290129	3117
Chr05	3680423	20166781	16486358	Chr05	4294861	4301374	6513
Chr05	3680423	20166781	16486358	Chr05	12638729	12647739	9010
Chr05	3680423	20166781	16486358	Chr05	13901760	13901768	8
Chr05	3680423	20166781	16486358	Chr05	13954993	13959137	4144
Chr05	3680423	20166781	16486358	Chr05	16273431	16273554	123
Chr05	3680423	20166781	16486358	Chr05	18049547	18051958	2411
Chr05	3680423	20166781	16486358	Chr05	19278630	19278640	10
Chr05	3680423	20166781	16486358	Chr05	19280826	19282107	1281
Chr05	3680423	20166781	16486358	Chr05	19301429	19314451	13022
Chr05	3680423	20166781	16486358	Chr05	19391012	19391806	794
Chr05	3680423	20166781	16486358	Chr05	19392750	19392898	148
Chr05	3680423	20166781	16486358	Chr05	19393822	19394263	441
Chr05	3680423	20166781	16486358	Chr05	19410268	19410852	584
Chr05	3680423	20166781	16486358	Chr05	19487244	19488223	979
Chr05	3680423	20166781	16486358	Chr05	19502138	19512814	10676
Chr05	3680423	20166781	16486358	Chr05	19527758	19527992	234
Chr05	3680423	20166781	16486358	Chr05	19546248	19557147	10899
Chr05	3680423	20166781	16486358	Chr05	19564853	19570042	5189
Chr05	3680423	20166781	16486358	Chr05	19623676	19625443	1767
Chr05	3680423	20166781	16486358	Chr05	19630072	19630246	174
Chr05	3680423	20166781	16486358	Chr05	19696584	19698930	2346
Chr05	3680423	20166781	16486358	Chr05	19699577	19707208	7631
Chr05	3680423	20166781	16486358	Chr05	19710781	19718264	7483
Chr05	3680423	20166781	16486358	Chr05	19727829	19727881	52
Chr05	3680423	20166781	16486358	Chr05	19767251	19769316	2065
Chr05	3680423	20166781	16486358	Chr05	19800144	19805535	5391
Chr05	3680423	20166781	16486358	Chr05	19810104	19810676	572
Chr05	3680423	20166781	16486358	Chr05	19813738	19816586	2848
Chr05	3680423	20166781	16486358	Chr05	19957996	19958352	356
Chr05	3680423	20166781	16486358	Chr05	19967464	19969765	2301
Chr05	3680423	20166781	16486358	Chr05	20007719	20008692	973
Chr05	3680423	20166781	16486358	Chr05	12335637	12412359	76722
Chr05	3680423	20166781	16486358	Chr05	12456100	12529736	73636
Chr05	3680423	20166781	16486358	Chr05	12625598	12632197	6599
Chr05	3680423	20166781	16486358	Chr05	14297101	14317617	20516
Chr05	3680423	20166781	16486358	Chr05	16217380	16242360	24980
Chr05	3680423	20166781	16486358	Chr05	16284690	16294252	9562
Chr05	3680423	20166781	16486358	Chr05	16301203	16318527	17324
Chr05	3680423	20166781	16486358	Chr05	16953357	16998527	45170
Chr05	3680423	20166781	16486358	Chr05	17234522	17237043	2521
Chr05	3680423	20166781	16486358	Chr05	17238993	17255349	16356
Chr05	3680423	20166781	16486358	Chr05	19283629	19286375	2746
Chr05	3680423	20166781	16486358	Chr05	19416193	19433226	17033
Chr05	3680423	20166781	16486358	Chr05	19434351	19482188	47837
Chr05	3680423	20166781	16486358	Chr05	19640782	19652213	11431
Chr05	3680423	20166781	16486358	Chr05	19753571	19761493	7922
Chr05	3680423	20166781	16486358	Chr05	19774552	19784788	10236
Chr05	3680423	20166781	16486358	Chr05	19955672	19956959	1287
Chr05	3680423	20166781	16486358	Chr05	19970251	19973215	2964
Chr05	3680423	20166781	16486358	Chr05	20124894	20170842	45948
Chr05	3680423	20166781	16486358	Chr05	12657729	13329614	671885
Chr05	3680423	20166781	16486358	Chr05	13345750	13487387	141637
Chr05	3680423	20166781	16486358	Chr05	13489416	13621023	131607
Chr05	3680423	20166781	16486358	Chr05	13966656	14292674	326018
Chr05	3680423	20166781	16486358	Chr05	15981444	16215558	234114
Chr05	3680423	20166781	16486358	Chr05	16250216	16271444	21228
Chr05	3680423	20166781	16486358	Chr05	16999787	17219593	219806
Chr05	3680423	20166781	16486358	Chr05	17258304	17310160	51856
Chr05	3680423	20166781	16486358	Chr05	17850150	18049019	198869
Chr05	3680423	20166781	16486358	Chr05	18055766	18089607	33841
Chr05	3680423	20166781	16486358	Chr05	19529239	19531344	2105
Chr05	3680423	20166781	16486358	Chr05	19657391	19688202	30811
Chr05	3680423	20166781	16486358	Chr05	1754906	4286287	2531381
Chr05	3680423	20166781	16486358	Chr05	4303557	5741693	1438136
Chr05	3680423	20166781	16486358	Chr05	12550205	12622126	71921
Chr05	3680423	20166781	16486358	Chr05	13625568	13889263	263695
Chr05	3680423	20166781	16486358	Chr05	14322272	15977426	1655154
Chr05	3680423	20166781	16486358	Chr05	17310806	17844202	533396
Chr05	3680423	20166781	16486358	Chr05	18093118	19252108	1158990
Chr05	3680423	20166781	16486358	Chr05	5753105	12306426	6553321
Chr05	3680423	20166781	16486358	Chr05	16319272	16942277	623005
Chr05	38840429	38892731	52302	Chr05	38853509	38882044	28535
Chr05	60558810	60603823	45013	Chr05	60563226	60613294	50068
Chr05	78786852	79176631	389779	Chr05	78894738	78904458	9720
Chr05	78786852	79176631	389779	Chr05	79109925	79109971	46
Chr05	83285897	83328113	42216	Chr05	83300397	83313587	13190
Chr05	94491384	94716224	224840	Chr05	94652721	94659236	6515
Chr05	94491384	94716224	224840	Chr05	94514681	94570139	55458
Chr05	94491384	94716224	224840	Chr05	94626434	94644565	18131
Chr05	122271776	122399375	127599	Chr05	122314178	122384948	70770
Chr06	20602	193245	172643	Chr06	0	3262816	3262816
Chr06	252105	294112	42007	Chr06	0	3262816	3262816
Chr06	299888	386557	86669	Chr06	0	3262816	3262816
Chr06	391109	595293	204184	Chr06	0	3262816	3262816
Chr06	628386	644472	16086	Chr06	0	3262816	3262816
Chr06	663256	676265	13009	Chr06	0	3262816	3262816
Chr06	684689	730667	45978	Chr06	0	3262816	3262816
Chr06	739243	750464	11221	Chr06	0	3262816	3262816
Chr06	753642	764863	11221	Chr06	0	3262816	3262816
Chr06	779595	791642	12047	Chr06	0	3262816	3262816
Chr06	796815	832103	35288	Chr06	0	3262816	3262816
Chr06	845386	856636	11250	Chr06	0	3262816	3262816
Chr06	861285	7609671	6748386	Chr06	3265943	3267073	1130
Chr06	861285	7609671	6748386	Chr06	3303854	3304482	628
Chr06	861285	7609671	6748386	Chr06	3361541	3370837	9296
Chr06	861285	7609671	6748386	Chr06	3383141	3386942	3801
Chr06	861285	7609671	6748386	Chr06	3397290	3401288	3998
Chr06	861285	7609671	6748386	Chr06	5573363	5574008	645
Chr06	861285	7609671	6748386	Chr06	5989408	5992253	2845
Chr06	861285	7609671	6748386	Chr06	3306077	3313169	7092
Chr06	861285	7609671	6748386	Chr06	3317491	3329350	11859
Chr06	861285	7609671	6748386	Chr06	3449786	3466761	16975
Chr06	861285	7609671	6748386	Chr06	5445633	5503884	58251
Chr06	861285	7609671	6748386	Chr06	5909955	5919577	9622
Chr06	861285	7609671	6748386	Chr06	5927083	5950641	23558
Chr06	861285	7609671	6748386	Chr06	5953006	5987357	34351
Chr06	861285	7609671	6748386	Chr06	6053415	6073649	20234
Chr06	861285	7609671	6748386	Chr06	3406091	3443003	36912
Chr06	861285	7609671	6748386	Chr06	5504909	5553428	48519
Chr06	861285	7609671	6748386	Chr06	5575795	5658778	82983
Chr06	861285	7609671	6748386	Chr06	5660796	5827116	166320
Chr06	861285	7609671	6748386	Chr06	5829243	5904231	74988
Chr06	861285	7609671	6748386	Chr06	5993837	6050901	57064
Chr06	861285	7609671	6748386	Chr06	6075444	6177107	101663
Chr06	861285	7609671	6748386	Chr06	6807098	6892670	85572
Chr06	861285	7609671	6748386	Chr06	7570334	7609738	39404
Chr06	861285	7609671	6748386	Chr06	0	3262816	3262816
Chr06	861285	7609671	6748386	Chr06	3470207	5438976	1968769
Chr06	861285	7609671	6748386	Chr06	6188593	6805851	617258
Chr06	861285	7609671	6748386	Chr06	6895781	7551771	655990
Chr06	14925114	15261010	335896	Chr06	14940999	15165751	224752
Chr06	20989314	20995537	6223	Chr06	20979774	21129426	149652
Chr06	20995771	21002275	6504	Chr06	20979774	21129426	149652
Chr06	21027954	21086486	58532	Chr06	20979774	21129426	149652
Chr06	21562247	21639843	77596	Chr06	21579134	21603854	24720
Chr06	21640755	21718584	77829	Chr06	21697530	21716924	19394
Chr06	102499086	102534415	35329	Chr06	102510859	102522632	11773
Chr06	128363985	128516802	152817	Chr06	128394485	128422852	28367
Chr06	133178803	133188299	9496	Chr06	133186402	133202087	15685
Chr07	18791	157367	138576	Chr07	0	878328	878328
Chr07	159668	206405	46737	Chr07	0	878328	878328
Chr07	215673	238219	22546	Chr07	0	878328	878328
Chr07	294835	445815	150980	Chr07	0	878328	878328
Chr07	465636	484990	19354	Chr07	0	878328	878328
Chr07	488436	499664	11228	Chr07	0	878328	878328
Chr07	542894	12550972	12008078	Chr07	1790573	1793451	2878
Chr07	542894	12550972	12008078	Chr07	1799876	1800002	126
Chr07	542894	12550972	12008078	Chr07	9663220	9665010	1790
Chr07	542894	12550972	12008078	Chr07	9667005	9668953	1948
Chr07	542894	12550972	12008078	Chr07	9675796	9679193	3397
Chr07	542894	12550972	12008078	Chr07	9821919	9827016	5097
Chr07	542894	12550972	12008078	Chr07	9830639	9831733	1094
Chr07	542894	12550972	12008078	Chr07	9949643	9956997	7354
Chr07	542894	12550972	12008078	Chr07	9958351	9958955	604
Chr07	542894	12550972	12008078	Chr07	9963352	9975692	12340
Chr07	542894	12550972	12008078	Chr07	9978213	9989265	11052
Chr07	542894	12550972	12008078	Chr07	9989637	9990128	491
Chr07	542894	12550972	12008078	Chr07	9991203	9992139	936
Chr07	542894	12550972	12008078	Chr07	9998095	10005601	7506
Chr07	542894	12550972	12008078	Chr07	10193740	10206869	13129
Chr07	542894	12550972	12008078	Chr07	10508718	10509713	995
Chr07	542894	12550972	12008078	Chr07	10594348	10594466	118
Chr07	542894	12550972	12008078	Chr07	10612961	10613418	457
Chr07	542894	12550972	12008078	Chr07	10617996	10624032	6036
Chr07	542894	12550972	12008078	Chr07	11108385	11117867	9482
Chr07	542894	12550972	12008078	Chr07	11158610	11158629	19
Chr07	542894	12550972	12008078	Chr07	11182732	11188527	5795
Chr07	542894	12550972	12008078	Chr07	11194256	11196448	2192
Chr07	542894	12550972	12008078	Chr07	11213499	11217846	4347
Chr07	542894	12550972	12008078	Chr07	11218950	11219371	421
Chr07	542894	12550972	12008078	Chr07	11338038	11341336	3298
Chr07	542894	12550972	12008078	Chr07	1780396	1788760	8364
Chr07	542894	12550972	12008078	Chr07	9461142	9506016	44874
Chr07	542894	12550972	12008078	Chr07	9525809	9564397	38588
Chr07	542894	12550972	12008078	Chr07	9633028	9660956	27928
Chr07	542894	12550972	12008078	Chr07	9726926	9760617	33691
Chr07	542894	12550972	12008078	Chr07	9770209	9802766	32557
Chr07	542894	12550972	12008078	Chr07	9894252	9918992	24740
Chr07	542894	12550972	12008078	Chr07	10107008	10112083	5075
Chr07	542894	12550972	12008078	Chr07	10155277	10193213	37936
Chr07	542894	12550972	12008078	Chr07	10368286	10388201	19915
Chr07	542894	12550972	12008078	Chr07	10449414	10485075	35661
Chr07	542894	12550972	12008078	Chr07	10531395	10539972	8577
Chr07	542894	12550972	12008078	Chr07	10890242	10897167	6925
Chr07	542894	12550972	12008078	Chr07	10903648	10920353	16705
Chr07	542894	12550972	12008078	Chr07	11048530	11105499	56969
Chr07	542894	12550972	12008078	Chr07	11189617	11190836	1219
Chr07	542894	12550972	12008078	Chr07	12499203	12526609	27406
Chr07	542894	12550972	12008078	Chr07	12528180	12542262	14082
Chr07	542894	12550972	12008078	Chr07	12546075	12552441	6366
Chr07	542894	12550972	12008078	Chr07	0	878328	878328
Chr07	542894	12550972	12008078	Chr07	8749732	8822209	72477
Chr07	542894	12550972	12008078	Chr07	8837032	9235626	398594
Chr07	542894	12550972	12008078	Chr07	9237880	9398870	160990
Chr07	542894	12550972	12008078	Chr07	10353393	10354757	1364
Chr07	542894	12550972	12008078	Chr07	10651663	10819809	168146
Chr07	542894	12550972	12008078	Chr07	10820800	10885336	64536
Chr07	542894	12550972	12008078	Chr07	10929890	11017140	87250
Chr07	542894	12550972	12008078	Chr07	11118419	11156607	38188
Chr07	542894	12550972	12008078	Chr07	11227753	11329066	101313
Chr07	542894	12550972	12008078	Chr07	12437261	12491613	54352
Chr07	542894	12550972	12008078	Chr07	883936	1778587	894651
Chr07	542894	12550972	12008078	Chr07	1827491	2665710	838219
Chr07	542894	12550972	12008078	Chr07	2669096	4533533	1864437
Chr07	542894	12550972	12008078	Chr07	9415924	9453715	37791
Chr07	542894	12550972	12008078	Chr07	11347543	12436569	1089026
Chr07	542894	12550972	12008078	Chr07	4540696	8739441	4198745
Chr07	12858334	14885880	2027546	Chr07	13263176	13265977	2801
Chr07	12858334	14885880	2027546	Chr07	13274063	13278336	4273
Chr07	12858334	14885880	2027546	Chr07	13252274	13256492	4218
Chr07	12858334	14885880	2027546	Chr07	13284615	13300318	15703
Chr07	12858334	14885880	2027546	Chr07	14761750	14762013	263
Chr07	12858334	14885880	2027546	Chr07	14843714	14856627	12913
Chr07	12858334	14885880	2027546	Chr07	12837563	13244303	406740
Chr07	12858334	14885880	2027546	Chr07	13301439	14689318	1387879
Chr07	24580640	24619052	38412	Chr07	24573856	24644938	71082
Chr07	24619266	24665142	45876	Chr07	24573856	24644938	71082
Chr07	25329406	25765717	436311	Chr07	25607594	25718979	111385
Chr07	125265731	125310996	45265	Chr07	125310422	125325000	14578
Chr08	27771	257525	229754	Chr08	25490	4241518	4216028
Chr08	274946	296428	21482	Chr08	25490	4241518	4216028
Chr08	296898	331228	34330	Chr08	25490	4241518	4216028
Chr08	345922	389760	43838	Chr08	25490	4241518	4216028
Chr08	409337	610972	201635	Chr08	25490	4241518	4216028
Chr08	612075	633608	21533	Chr08	25490	4241518	4216028
Chr08	634980	750164	115184	Chr08	25490	4241518	4216028
Chr08	767785	13012142	12244357	Chr08	9328323	9329226	903
Chr08	767785	13012142	12244357	Chr08	9444240	9451877	7637
Chr08	767785	13012142	12244357	Chr08	9459032	9469257	10225
Chr08	767785	13012142	12244357	Chr08	10988718	10990264	1546
Chr08	767785	13012142	12244357	Chr08	11469021	11472459	3438
Chr08	767785	13012142	12244357	Chr08	11579653	11580565	912
Chr08	767785	13012142	12244357	Chr08	11582035	11583095	1060
Chr08	767785	13012142	12244357	Chr08	11588364	11593529	5165
Chr08	767785	13012142	12244357	Chr08	11610996	11614313	3317
Chr08	767785	13012142	12244357	Chr08	11633654	11633656	2
Chr08	767785	13012142	12244357	Chr08	9338514	9432525	94011
Chr08	767785	13012142	12244357	Chr08	10924364	10975462	51098
Chr08	767785	13012142	12244357	Chr08	11630958	11633278	2320
Chr08	767785	13012142	12244357	Chr08	8576484	8934747	358263
Chr08	767785	13012142	12244357	Chr08	8935202	9100933	165731
Chr08	767785	13012142	12244357	Chr08	9103043	9326363	223320
Chr08	767785	13012142	12244357	Chr08	10995317	11134744	139427
Chr08	767785	13012142	12244357	Chr08	11139279	11466977	327698
Chr08	767785	13012142	12244357	Chr08	25490	4241518	4216028
Chr08	767785	13012142	12244357	Chr08	9481643	10922018	1440375
Chr08	767785	13012142	12244357	Chr08	11476589	11561632	85043
Chr08	767785	13012142	12244357	Chr08	11638787	13012133	1373346
Chr08	767785	13012142	12244357	Chr08	4258439	8572086	4313647
Chr08	19632984	19653587	20603	Chr08	19638414	19648474	10060
Chr08	34956053	35342127	386074	Chr08	35057679	35077274	19595
Chr08	34956053	35342127	386074	Chr08	34994799	35054381	59582
Chr08	35658984	35851743	192759	Chr08	35751705	35776063	24358
Chr08	82730365	82769115	38750	Chr08	82701475	82803785	102310
Chr08	82770563	82777050	6487	Chr08	82701475	82803785	102310
Chr08	82880019	82889562	9543	Chr08	82881182	82905677	24495
Chr08	82903603	82915076	11473	Chr08	82881182	82905677	24495
Chr08	83011994	83022631	10637	Chr08	83017011	83143292	126281
Chr08	83026973	83055489	28516	Chr08	83017011	83143292	126281
Chr08	83393988	83405263	11275	Chr08	83391701	83401897	10196
Chr08	83412243	83438103	25860	Chr08	83408644	83707700	299056
Chr08	83518157	83632478	114321	Chr08	83408644	83707700	299056
Chr08	83632638	83746560	113922	Chr08	83408644	83707700	299056
Chr08	126305283	126406810	101527	Chr08	126381002	126426250	45248
Chr09	20497	279466	258969	Chr09	0	767608	767608
Chr09	302123	331784	29661	Chr09	0	767608	767608
Chr09	439749	451158	11409	Chr09	0	767608	767608
Chr09	487213	498486	11273	Chr09	0	767608	767608
Chr09	500277	511416	11139	Chr09	0	767608	767608
Chr09	512622	533740	21118	Chr09	0	767608	767608
Chr09	561391	574581	13190	Chr09	0	767608	767608
Chr09	671202	685132	13930	Chr09	0	767608	767608
Chr09	719472	8793487	8074015	Chr09	921209	921772	563
Chr09	719472	8793487	8074015	Chr09	5247284	5248607	1323
Chr09	719472	8793487	8074015	Chr09	5254759	5256349	1590
Chr09	719472	8793487	8074015	Chr09	5259954	5266465	6511
Chr09	719472	8793487	8074015	Chr09	5269791	5272252	2461
Chr09	719472	8793487	8074015	Chr09	5274865	5275048	183
Chr09	719472	8793487	8074015	Chr09	5277318	5278903	1585
Chr09	719472	8793487	8074015	Chr09	5300543	5303782	3239
Chr09	719472	8793487	8074015	Chr09	5172687	5179764	7077
Chr09	719472	8793487	8074015	Chr09	5201663	5216313	14650
Chr09	719472	8793487	8074015	Chr09	0	767608	767608
Chr09	719472	8793487	8074015	Chr09	770475	914255	143780
Chr09	719472	8793487	8074015	Chr09	7910933	8067956	157023
Chr09	719472	8793487	8074015	Chr09	943612	3706959	2763347
Chr09	719472	8793487	8074015	Chr09	3717623	5158138	1440515
Chr09	719472	8793487	8074015	Chr09	5305319	6451183	1145864
Chr09	719472	8793487	8074015	Chr09	6470632	7858334	1387702
Chr09	719472	8793487	8074015	Chr09	8068949	9946081	1877132
Chr09	8837223	9920659	1083436	Chr09	8068949	9946081	1877132
Chr09	9979729	16176247	6196518	Chr09	10473664	10477807	4143
Chr09	9979729	16176247	6196518	Chr09	11241766	11243908	2142
Chr09	9979729	16176247	6196518	Chr09	11593901	11597372	3471
Chr09	9979729	16176247	6196518	Chr09	12506109	12512773	6664
Chr09	9979729	16176247	6196518	Chr09	12520940	12522852	1912
Chr09	9979729	16176247	6196518	Chr09	14966961	14967939	978
Chr09	9979729	16176247	6196518	Chr09	14975002	14989374	14372
Chr09	9979729	16176247	6196518	Chr09	15011263	15023553	12290
Chr09	9979729	16176247	6196518	Chr09	15027883	15029803	1920
Chr09	9979729	16176247	6196518	Chr09	15151468	15154644	3176
Chr09	9979729	16176247	6196518	Chr09	15542272	15546097	3825
Chr09	9979729	16176247	6196518	Chr09	15632620	15633480	860
Chr09	9979729	16176247	6196518	Chr09	15931941	15934680	2739
Chr09	9979729	16176247	6196518	Chr09	16099103	16100594	1491
Chr09	9979729	16176247	6196518	Chr09	16107495	16107816	321
Chr09	9979729	16176247	6196518	Chr09	11219893	11230125	10232
Chr09	9979729	16176247	6196518	Chr09	11288291	11289490	1199
Chr09	9979729	16176247	6196518	Chr09	11570540	11588066	17526
Chr09	9979729	16176247	6196518	Chr09	11606561	11649248	42687
Chr09	9979729	16176247	6196518	Chr09	12746413	12843521	97108
Chr09	9979729	16176247	6196518	Chr09	13450292	13451314	1022
Chr09	9979729	16176247	6196518	Chr09	13457308	13496704	39396
Chr09	9979729	16176247	6196518	Chr09	14630768	14669452	38684
Chr09	9979729	16176247	6196518	Chr09	14839929	14851695	11766
Chr09	9979729	16176247	6196518	Chr09	14856963	14915620	58657
Chr09	9979729	16176247	6196518	Chr09	14990268	15004774	14506
Chr09	9979729	16176247	6196518	Chr09	15092926	15111514	18588
Chr09	9979729	16176247	6196518	Chr09	15160281	15178837	18556
Chr09	9979729	16176247	6196518	Chr09	15496694	15516592	19898
Chr09	9979729	16176247	6196518	Chr09	15551811	15587292	35481
Chr09	9979729	16176247	6196518	Chr09	15617556	15630580	13024
Chr09	9979729	16176247	6196518	Chr09	15893772	15930870	37098
Chr09	9979729	16176247	6196518	Chr09	16129841	16148537	18696
Chr09	9979729	16176247	6196518	Chr09	9972572	10107830	135258
Chr09	9979729	16176247	6196518	Chr09	10123805	10466947	343142
Chr09	9979729	16176247	6196518	Chr09	10485868	10976394	490526
Chr09	9979729	16176247	6196518	Chr09	10977971	11214324	236353
Chr09	9979729	16176247	6196518	Chr09	11254084	11273743	19659
Chr09	9979729	16176247	6196518	Chr09	11650963	12501501	850538
Chr09	9979729	16176247	6196518	Chr09	12845931	13446465	600534
Chr09	9979729	16176247	6196518	Chr09	13499914	13605016	105102
Chr09	9979729	16176247	6196518	Chr09	13831471	14480531	649060
Chr09	9979729	16176247	6196518	Chr09	14499031	14620272	121241
Chr09	9979729	16176247	6196518	Chr09	14726545	14828377	101832
Chr09	9979729	16176247	6196518	Chr09	14920623	14945313	24690
Chr09	9979729	16176247	6196518	Chr09	15032424	15090502	58078
Chr09	9979729	16176247	6196518	Chr09	15190250	15492044	301794
Chr09	9979729	16176247	6196518	Chr09	15940946	16076907	135961
Chr09	9979729	16176247	6196518	Chr09	16119195	16122341	3146
Chr09	9979729	16176247	6196518	Chr09	11294777	11566204	271427
Chr09	9979729	16176247	6196518	Chr09	12525847	12686752	160905
Chr09	9979729	16176247	6196518	Chr09	13619503	13830338	210835
Chr09	9979729	16176247	6196518	Chr09	14674860	14722941	48081
Chr09	9979729	16176247	6196518	Chr09	15654362	15884388	230026
Chr09	16649966	16988092	338126	Chr09	16812400	16815793	3393
Chr09	16649966	16988092	338126	Chr09	16695001	16699248	4247
Chr09	16649966	16988092	338126	Chr09	16840079	16847799	7720
Chr09	16649966	16988092	338126	Chr09	16858700	16860291	1591
Chr09	16649966	16988092	338126	Chr09	16870961	16877404	6443
Chr09	16649966	16988092	338126	Chr09	16885953	16935258	49305
Chr09	104049373	104308352	258979	Chr09	104087829	104090367	2538
Chr09	104049373	104308352	258979	Chr09	104280023	104282532	2509
Chr09	104049373	104308352	258979	Chr09	104168887	104193022	24135
Chr09	104049373	104308352	258979	Chr09	104290985	104403754	112769
Chr09	104328897	104337822	8925	Chr09	104290985	104403754	112769
Chr09	104344554	104345798	1244	Chr09	104290985	104403754	112769
Chr09	104347912	104477925	130013	Chr09	104290985	104403754	112769
Chr09	104478414	104545605	67191	Chr09	104531432	104550065	18633
Chr10	27479	257230	229751	Chr10	0	1080771	1080771
Chr10	274652	296134	21482	Chr10	0	1080771	1080771
Chr10	296604	755044	458440	Chr10	0	1080771	1080771
Chr10	776311	797714	21403	Chr10	0	1080771	1080771
Chr10	830692	966828	136136	Chr10	0	1080771	1080771
Chr10	1012787	9902011	8889224	Chr10	4137847	4144074	6227
Chr10	1012787	9902011	8889224	Chr10	4188438	4193026	4588
Chr10	1012787	9902011	8889224	Chr10	4196091	4196988	897
Chr10	1012787	9902011	8889224	Chr10	4245846	4252156	6310
Chr10	1012787	9902011	8889224	Chr10	4262145	4271516	9371
Chr10	1012787	9902011	8889224	Chr10	6441446	6448365	6919
Chr10	1012787	9902011	8889224	Chr10	7409937	7411530	1593
Chr10	1012787	9902011	8889224	Chr10	7444877	7445053	176
Chr10	1012787	9902011	8889224	Chr10	7448966	7452883	3917
Chr10	1012787	9902011	8889224	Chr10	7481199	7484894	3695
Chr10	1012787	9902011	8889224	Chr10	7493064	7495819	2755
Chr10	1012787	9902011	8889224	Chr10	7513745	7517721	3976
Chr10	1012787	9902011	8889224	Chr10	9809121	9810423	1302
Chr10	1012787	9902011	8889224	Chr10	9847569	9848261	692
Chr10	1012787	9902011	8889224	Chr10	1088606	1103700	15094
Chr10	1012787	9902011	8889224	Chr10	1106979	1124558	17579
Chr10	1012787	9902011	8889224	Chr10	4092565	4131155	38590
Chr10	1012787	9902011	8889224	Chr10	4145883	4173172	27289
Chr10	1012787	9902011	8889224	Chr10	4175165	4180946	5781
Chr10	1012787	9902011	8889224	Chr10	4203749	4244715	40966
Chr10	1012787	9902011	8889224	Chr10	6381476	6396588	15112
Chr10	1012787	9902011	8889224	Chr10	7436411	7442462	6051
Chr10	1012787	9902011	8889224	Chr10	7518035	7532708	14673
Chr10	1012787	9902011	8889224	Chr10	7534011	7540178	6167
Chr10	1012787	9902011	8889224	Chr10	7766113	7786647	20534
Chr10	1012787	9902011	8889224	Chr10	9502842	9563272	60430
Chr10	1012787	9902011	8889224	Chr10	9728242	9781717	53475
Chr10	1012787	9902011	8889224	Chr10	9794621	9800781	6160
Chr10	1012787	9902011	8889224	Chr10	4273158	4496873	223715
Chr10	1012787	9902011	8889224	Chr10	6397910	6435389	37479
Chr10	1012787	9902011	8889224	Chr10	7548936	7750851	201915
Chr10	1012787	9902011	8889224	Chr10	8437112	8878390	441278
Chr10	1012787	9902011	8889224	Chr10	9572627	9712294	139667
Chr10	1012787	9902011	8889224	Chr10	0	1080771	1080771
Chr10	1012787	9902011	8889224	Chr10	1129176	4086838	2957662
Chr10	1012787	9902011	8889224	Chr10	4516342	6379924	1863582
Chr10	1012787	9902011	8889224	Chr10	6451138	7407791	956653
Chr10	1012787	9902011	8889224	Chr10	8879282	9466327	587045
Chr10	1012787	9902011	8889224	Chr10	7789620	8435808	646188
Chr10	32605844	32620339	14495	Chr10	32600779	32616065	15286
Chr10	33647073	33878336	231263	Chr10	33642814	33650700	7886
Chr10	33647073	33878336	231263	Chr10	33777496	33778729	1233
Chr10	33647073	33878336	231263	Chr10	33791921	33793327	1406
Chr10	33647073	33878336	231263	Chr10	33704651	33734357	29706
Chr10	33647073	33878336	231263	Chr10	33743263	33773452	30189
Chr10	33647073	33878336	231263	Chr10	33779922	33786872	6950
Chr10	33647073	33878336	231263	Chr10	33653262	33687934	34672
Chr10	33647073	33878336	231263	Chr10	33801799	33825187	23388
Chr10	33882423	33890090	7667	Chr10	33879301	33902139	22838
Chr10	34003707	34373324	369617	Chr10	34017461	34017937	476
Chr10	34003707	34373324	369617	Chr10	34062606	34065497	2891
Chr10	34003707	34373324	369617	Chr10	34093977	34126829	32852
Chr10	34003707	34373324	369617	Chr10	34131161	34148644	17483
Chr10	34003707	34373324	369617	Chr10	34219845	34231173	11328
Chr10	34003707	34373324	369617	Chr10	34071840	34080455	8615
Chr10	34003707	34373324	369617	Chr10	34153222	34217615	64393
Chr10	34003707	34373324	369617	Chr10	34260400	34375766	115366
Chr10	34375959	34732686	356727	Chr10	34428951	34431680	2729
Chr10	34375959	34732686	356727	Chr10	34473601	34474117	516
Chr10	34375959	34732686	356727	Chr10	34529048	34529132	84
Chr10	34375959	34732686	356727	Chr10	34539186	34551996	12810
Chr10	34375959	34732686	356727	Chr10	34583010	34583923	913
Chr10	34375959	34732686	356727	Chr10	34587306	34590837	3531
Chr10	34375959	34732686	356727	Chr10	34397002	34413912	16910
Chr10	34375959	34732686	356727	Chr10	34420626	34427662	7036
Chr10	34375959	34732686	356727	Chr10	34552431	34577048	24617
Chr10	36266192	36273562	7370	Chr10	36266145	36273743	7598
Chr10	37090582	37115765	25183	Chr10	37101933	37108955	7022
Chr10	91420043	91430261	10218	Chr10	91423629	91423815	186
Chr11	20602	193988	173386	Chr11	0	1962777	1962777
Chr11	213130	237965	24835	Chr11	0	1962777	1962777
Chr11	252105	595293	343188	Chr11	0	1962777	1962777
Chr11	628386	10509729	9881343	Chr11	10181070	10186944	5874
Chr11	628386	10509729	9881343	Chr11	10191028	10195326	4298
Chr11	628386	10509729	9881343	Chr11	10228339	10230490	2151
Chr11	628386	10509729	9881343	Chr11	10264471	10268163	3692
Chr11	628386	10509729	9881343	Chr11	10273182	10275033	1851
Chr11	628386	10509729	9881343	Chr11	10275580	10281221	5641
Chr11	628386	10509729	9881343	Chr11	10293297	10295338	2041
Chr11	628386	10509729	9881343	Chr11	10435315	10436514	1199
Chr11	628386	10509729	9881343	Chr11	1975254	2090595	115341
Chr11	628386	10509729	9881343	Chr11	2123526	2189620	66094
Chr11	628386	10509729	9881343	Chr11	2201528	2216539	15011
Chr11	628386	10509729	9881343	Chr11	7108007	7148945	40938
Chr11	628386	10509729	9881343	Chr11	10196241	10208763	12522
Chr11	628386	10509729	9881343	Chr11	10239408	10241165	1757
Chr11	628386	10509729	9881343	Chr11	10370033	10382469	12436
Chr11	628386	10509729	9881343	Chr11	10383052	10424796	41744
Chr11	628386	10509729	9881343	Chr11	9768937	9938731	169794
Chr11	628386	10509729	9881343	Chr11	9993885	10179771	185886
Chr11	628386	10509729	9881343	Chr11	10209891	10227270	17379
Chr11	628386	10509729	9881343	Chr11	10319336	10362195	42859
Chr11	628386	10509729	9881343	Chr11	0	1962777	1962777
Chr11	628386	10509729	9881343	Chr11	2223009	3187838	964829
Chr11	628386	10509729	9881343	Chr11	3189379	5502843	2313464
Chr11	628386	10509729	9881343	Chr11	5517304	7097910	1580606
Chr11	628386	10509729	9881343	Chr11	7170568	8350340	1179772
Chr11	628386	10509729	9881343	Chr11	8359630	9767210	1407580
Chr11	57281000	57289649	8649	Chr11	57285323	57290528	5205
Chr11	57310787	57380623	69836	Chr11	57377373	57381554	4181
Chr11	109277162	109424583	147421	Chr11	109332179	109359925	27746
Chr11	109277162	109424583	147421	Chr11	109392468	109428776	36308
Chr11	116984066	117413634	429568	Chr11	117141003	117167900	26897
Chr11	116984066	117413634	429568	Chr11	117360659	117425727	65068
Chr11	116984066	117413634	429568	Chr11	117209020	117332218	123198
Chr12	27060	37999	10939	Chr12	0	812114	812114
Chr12	42400	252715	210315	Chr12	0	812114	812114
Chr12	264952	297195	32243	Chr12	0	812114	812114
Chr12	306093	322569	16476	Chr12	0	812114	812114
Chr12	333521	345189	11668	Chr12	0	812114	812114
Chr12	346557	357539	10982	Chr12	0	812114	812114
Chr12	603268	629565	26297	Chr12	0	812114	812114
Chr12	633060	7468021	6834961	Chr12	4121869	4126115	4246
Chr12	633060	7468021	6834961	Chr12	4363015	4370718	7703
Chr12	633060	7468021	6834961	Chr12	4506369	4520028	13659
Chr12	633060	7468021	6834961	Chr12	4534523	4536782	2259
Chr12	633060	7468021	6834961	Chr12	4548647	4553959	5312
Chr12	633060	7468021	6834961	Chr12	5311889	5313230	1341
Chr12	633060	7468021	6834961	Chr12	5315794	5318824	3030
Chr12	633060	7468021	6834961	Chr12	5328779	5335283	6504
Chr12	633060	7468021	6834961	Chr12	5343898	5352485	8587
Chr12	633060	7468021	6834961	Chr12	5361388	5371269	9881
Chr12	633060	7468021	6834961	Chr12	4128603	4158861	30258
Chr12	633060	7468021	6834961	Chr12	4162203	4191351	29148
Chr12	633060	7468021	6834961	Chr12	4383257	4446306	63049
Chr12	633060	7468021	6834961	Chr12	5319192	5326181	6989
Chr12	633060	7468021	6834961	Chr12	5335946	5343250	7304
Chr12	633060	7468021	6834961	Chr12	5384194	5454817	70623
Chr12	633060	7468021	6834961	Chr12	0	812114	812114
Chr12	633060	7468021	6834961	Chr12	1169931	1585949	416018
Chr12	633060	7468021	6834961	Chr12	4248139	4342524	94385
Chr12	633060	7468021	6834961	Chr12	4449413	4488152	38739
Chr12	633060	7468021	6834961	Chr12	812525	1166168	353643
Chr12	633060	7468021	6834961	Chr12	1600304	4116220	2515916
Chr12	633060	7468021	6834961	Chr12	4193321	4246605	53284
Chr12	633060	7468021	6834961	Chr12	4594229	5307541	713312
Chr12	633060	7468021	6834961	Chr12	5474581	9866193	4391612
Chr12	12642833	14191976	1549143	Chr12	12682281	12687669	5388
Chr12	12642833	14191976	1549143	Chr12	12747005	12750549	3544
Chr12	12642833	14191976	1549143	Chr12	12888812	12889966	1154
Chr12	12642833	14191976	1549143	Chr12	12891129	12891601	472
Chr12	12642833	14191976	1549143	Chr12	12894789	12898475	3686
Chr12	12642833	14191976	1549143	Chr12	12898851	12899114	263
Chr12	12642833	14191976	1549143	Chr12	12903471	12904906	1435
Chr12	12642833	14191976	1549143	Chr12	12914099	12915000	901
Chr12	12642833	14191976	1549143	Chr12	13001275	13001685	410
Chr12	12642833	14191976	1549143	Chr12	13002119	13004869	2750
Chr12	12642833	14191976	1549143	Chr12	13052813	13054565	1752
Chr12	12642833	14191976	1549143	Chr12	13063817	13065198	1381
Chr12	12642833	14191976	1549143	Chr12	13066157	13066272	115
Chr12	12642833	14191976	1549143	Chr12	13070923	13072588	1665
Chr12	12642833	14191976	1549143	Chr12	13076840	13078741	1901
Chr12	12642833	14191976	1549143	Chr12	13133941	13139515	5574
Chr12	12642833	14191976	1549143	Chr12	13191036	13193184	2148
Chr12	12642833	14191976	1549143	Chr12	13195268	13205200	9932
Chr12	12642833	14191976	1549143	Chr12	13206277	13212362	6085
Chr12	12642833	14191976	1549143	Chr12	14074748	14083454	8706
Chr12	12642833	14191976	1549143	Chr12	12694786	12705808	11022
Chr12	12642833	14191976	1549143	Chr12	12720973	12738022	17049
Chr12	12642833	14191976	1549143	Chr12	12751922	12837114	85192
Chr12	12642833	14191976	1549143	Chr12	12846174	12871170	24996
Chr12	12642833	14191976	1549143	Chr12	12874563	12883533	8970
Chr12	12642833	14191976	1549143	Chr12	12988784	12992804	4020
Chr12	12642833	14191976	1549143	Chr12	13055637	13061074	5437
Chr12	12642833	14191976	1549143	Chr12	13107767	13132605	24838
Chr12	12642833	14191976	1549143	Chr12	13139953	13141642	1689
Chr12	12642833	14191976	1549143	Chr12	13147923	13183929	36006
Chr12	12642833	14191976	1549143	Chr12	13213030	13222986	9956
Chr12	12642833	14191976	1549143	Chr12	14040748	14044860	4112
Chr12	12642833	14191976	1549143	Chr12	12931899	12987883	55984
Chr12	12642833	14191976	1549143	Chr12	13224332	13615117	390785
Chr12	12642833	14191976	1549143	Chr12	13637689	14036937	399248
Chr12	12642833	14191976	1549143	Chr12	14089628	14192003	102375
Chr12	12642833	14191976	1549143	Chr12	11307775	12660337	1352562
Chr12	14195620	14662288	466668	Chr12	14585225	14848071	262846
Chr12	14662776	15678734	1015958	Chr12	14850112	14852238	2126
Chr12	14662776	15678734	1015958	Chr12	14852960	14855411	2451
Chr12	14662776	15678734	1015958	Chr12	14911270	14915741	4471
Chr12	14662776	15678734	1015958	Chr12	15344505	15348263	3758
Chr12	14662776	15678734	1015958	Chr12	15353515	15356652	3137
Chr12	14662776	15678734	1015958	Chr12	14865117	14878630	13513
Chr12	14662776	15678734	1015958	Chr12	14885538	14904249	18711
Chr12	14662776	15678734	1015958	Chr12	14956189	14984914	28725
Chr12	14662776	15678734	1015958	Chr12	14996145	15013438	17293
Chr12	14662776	15678734	1015958	Chr12	15033061	15308949	275888
Chr12	14662776	15678734	1015958	Chr12	15314586	15343142	28556
Chr12	14662776	15678734	1015958	Chr12	14585225	14848071	262846
Chr12	14662776	15678734	1015958	Chr12	15358696	15942039	583343
Chr12	77978215	77987771	9556	Chr12	77982756	77984641	1885
Chr12	85457089	85481162	24073	Chr12	85469148	85469157	9
Chr12	86307310	86430171	122861	Chr12	86323304	86327213	3909
Chr12	86307310	86430171	122861	Chr12	86339582	86344948	5366
Chr12	87678876	87720118	41242	Chr12	87694189	87694722	533
Chr12	87843724	87920527	76803	Chr12	87837817	87889014	51197
Chr12	87843724	87920527	76803	Chr12	87912176	87924642	12466
Chr12	87921508	87936168	14660	Chr12	87912176	87924642	12466
Chr12	87921508	87936168	14660	Chr12	87925921	87940993	15072
Chr12	87978903	88016943	38040	Chr12	87981502	87997842	16340
Chr12	87978903	88016943	38040	Chr12	88001257	88089732	88475
Chr12	88044443	88114200	69757	Chr12	88097207	88098709	1502
Chr12	88044443	88114200	69757	Chr12	88001257	88089732	88475
Chr12	88239204	88258121	18917	Chr12	88240256	88247616	7360
Chr12	88327150	89066320	739170	Chr12	88393670	88393932	262
Chr12	88327150	89066320	739170	Chr12	88399570	88399851	281
Chr12	88327150	89066320	739170	Chr12	88403185	88403222	37
Chr12	89229263	89550812	321549	Chr12	89394585	89395898	1313
Chr12	89229263	89550812	321549	Chr12	89530874	89531437	563
Chr12	89229263	89550812	321549	Chr12	89282355	89336547	54192
Chr12	89229263	89550812	321549	Chr12	89408390	89428200	19810
Chr12	89229263	89550812	321549	Chr12	89431381	89489031	57650
Chr12	89229263	89550812	321549	Chr12	89490542	89520438	29896
Chr12	89551371	89800486	249115	Chr12	89702838	89737909	35071
Chr12	89551371	89800486	249115	Chr12	89750499	89758126	7627
Chr12	89551371	89800486	249115	Chr12	89603050	89676836	73786
Chr12	89551371	89800486	249115	Chr12	89775668	89792441	16773
Chr12	90161902	91261998	1100096	Chr12	90325532	90328917	3385
Chr12	90161902	91261998	1100096	Chr12	90396115	90400604	4489
Chr12	90161902	91261998	1100096	Chr12	90407411	90409534	2123
Chr12	90161902	91261998	1100096	Chr12	90427074	90430731	3657
Chr12	90161902	91261998	1100096	Chr12	90529971	90529979	8
Chr12	90161902	91261998	1100096	Chr12	90543784	90544406	622
Chr12	90161902	91261998	1100096	Chr12	90546323	90548445	2122
Chr12	90161902	91261998	1100096	Chr12	90586146	90587076	930
Chr12	90161902	91261998	1100096	Chr12	90589930	90599869	9939
Chr12	90161902	91261998	1100096	Chr12	90601662	90602285	623
Chr12	90161902	91261998	1100096	Chr12	90673172	90674121	949
Chr12	90161902	91261998	1100096	Chr12	90678896	90678949	53
Chr12	90161902	91261998	1100096	Chr12	90758919	90761232	2313
Chr12	90161902	91261998	1100096	Chr12	90761869	90767029	5160
Chr12	90161902	91261998	1100096	Chr12	90835332	90838170	2838
Chr12	90161902	91261998	1100096	Chr12	91017851	91020138	2287
Chr12	90161902	91261998	1100096	Chr12	91027150	91027454	304
Chr12	90161902	91261998	1100096	Chr12	91036832	91045609	8777
Chr12	90161902	91261998	1100096	Chr12	90283488	90299814	16326
Chr12	90161902	91261998	1100096	Chr12	90368682	90391791	23109
Chr12	90161902	91261998	1100096	Chr12	90464798	90476688	11890
Chr12	90161902	91261998	1100096	Chr12	90479460	90525603	46143
Chr12	90161902	91261998	1100096	Chr12	90537276	90541802	4526
Chr12	90161902	91261998	1100096	Chr12	90611990	90624482	12492
Chr12	90161902	91261998	1100096	Chr12	90626856	90669573	42717
Chr12	90161902	91261998	1100096	Chr12	90767739	90788971	21232
Chr12	90161902	91261998	1100096	Chr12	90855226	90896707	41481
Chr12	90161902	91261998	1100096	Chr12	90901244	90952765	51521
Chr12	90161902	91261998	1100096	Chr12	90990935	91001626	10691
Chr12	90161902	91261998	1100096	Chr12	91147659	91215458	67799
Chr12	90161902	91261998	1100096	Chr12	90436883	90462964	26081
Chr12	90161902	91261998	1100096	Chr12	90552993	90580850	27857
Chr12	90161902	91261998	1100096	Chr12	90684331	90750529	66198
Chr12	90161902	91261998	1100096	Chr12	90962686	90968732	6046
Chr12	90161902	91261998	1100096	Chr12	90144880	90279523	134643
Chr12	91407595	91745020	337425	Chr12	91512335	91512510	175
Chr12	91407595	91745020	337425	Chr12	91625812	91628377	2565
Chr12	91407595	91745020	337425	Chr12	91661022	91667187	6165
Chr12	91407595	91745020	337425	Chr12	91671404	91673849	2445
Chr12	91407595	91745020	337425	Chr12	91631526	91638942	7416
Chr13	18788	445853	427065	Chr13	0	1763273	1763273
Chr13	465678	485033	19355	Chr13	0	1763273	1763273
Chr13	488483	499711	11228	Chr13	0	1763273	1763273
Chr13	525297	5585943	5060646	Chr13	4270885	4271709	824
Chr13	525297	5585943	5060646	Chr13	5181145	5182775	1630
Chr13	525297	5585943	5060646	Chr13	5183775	5193099	9324
Chr13	525297	5585943	5060646	Chr13	5196411	5201816	5405
Chr13	525297	5585943	5060646	Chr13	5533091	5533332	241
Chr13	525297	5585943	5060646	Chr13	4231395	4265458	34063
Chr13	525297	5585943	5060646	Chr13	4623451	4679554	56103
Chr13	525297	5585943	5060646	Chr13	4865984	4952297	86313
Chr13	525297	5585943	5060646	Chr13	5093248	5099764	6516
Chr13	525297	5585943	5060646	Chr13	5130096	5148811	18715
Chr13	525297	5585943	5060646	Chr13	5549604	5554909	5305
Chr13	525297	5585943	5060646	Chr13	1786934	1897728	110794
Chr13	525297	5585943	5060646	Chr13	2348771	2814215	465444
Chr13	525297	5585943	5060646	Chr13	4286083	4525264	239181
Chr13	525297	5585943	5060646	Chr13	4711405	4849823	138418
Chr13	525297	5585943	5060646	Chr13	0	1763273	1763273
Chr13	525297	5585943	5060646	Chr13	2095946	2336170	240224
Chr13	525297	5585943	5060646	Chr13	2822250	4117083	1294833
Chr13	525297	5585943	5060646	Chr13	4118363	4223829	105466
Chr13	15983874	16130426	146552	Chr13	15991641	16035234	43593
Chr13	15983874	16130426	146552	Chr13	16089716	16155609	65893
Chr13	16130659	16269679	139020	Chr13	16177296	16182410	5114
Chr13	16130659	16269679	139020	Chr13	16170542	16176970	6428
Chr13	16130659	16269679	139020	Chr13	16089716	16155609	65893
Chr13	16130659	16269679	139020	Chr13	16216650	16301235	84585
Chr13	16360766	16379922	19156	Chr13	16349983	16430756	80773
Chr13	16412145	16444021	31876	Chr13	16439615	16442884	3269
Chr13	16412145	16444021	31876	Chr13	16349983	16430756	80773
Chr13	16444607	16598256	153649	Chr13	16508792	16537452	28660
Chr13	16651209	16825642	174433	Chr13	16781783	16786808	5025
Chr13	16651209	16825642	174433	Chr13	16787583	16790808	3225
Chr13	16651209	16825642	174433	Chr13	16792509	16797151	4642
Chr13	16651209	16825642	174433	Chr13	16607957	16678051	70094
Chr13	23059347	23116997	57650	Chr13	23086807	23096307	9500
Chr13	68222065	68348367	126302	Chr13	68285138	68301059	15921
Chr13	79374578	79389495	14917	Chr13	79369184	79375169	5985
Chr13	89208652	89246978	38326	Chr13	89246962	89258978	12016
Chr14	19424	313123	293699	Chr14	0	624685	624685
Chr14	319165	337608	18443	Chr14	0	624685	624685
Chr14	347253	537251	189998	Chr14	0	624685	624685
Chr14	540806	630203	89397	Chr14	0	624685	624685
Chr14	632522	8858644	8226122	Chr14	7773158	7781422	8264
Chr14	632522	8858644	8226122	Chr14	7817909	7818197	288
Chr14	632522	8858644	8226122	Chr14	7917318	7919412	2094
Chr14	632522	8858644	8226122	Chr14	8124660	8125486	826
Chr14	632522	8858644	8226122	Chr14	8291349	8298451	7102
Chr14	632522	8858644	8226122	Chr14	8324582	8326567	1985
Chr14	632522	8858644	8226122	Chr14	8088794	8096468	7674
Chr14	632522	8858644	8226122	Chr14	8676861	8729378	52517
Chr14	632522	8858644	8226122	Chr14	651240	956204	304964
Chr14	632522	8858644	8226122	Chr14	6933912	7293979	360067
Chr14	632522	8858644	8226122	Chr14	7858022	7876231	18209
Chr14	632522	8858644	8226122	Chr14	8745261	8902787	157526
Chr14	632522	8858644	8226122	Chr14	957912	1872915	915003
Chr14	632522	8858644	8226122	Chr14	1878226	3202156	1323930
Chr14	632522	8858644	8226122	Chr14	3220295	6928124	3707829
Chr14	632522	8858644	8226122	Chr14	7298037	7746460	448423
Chr14	632522	8858644	8226122	Chr14	8345761	8662832	317071
Chr14	8932287	9001353	69066	Chr14	8925632	9070913	145281
Chr14	9092104	9186446	94342	Chr14	9075738	9152480	76742
Chr14	9092104	9186446	94342	Chr14	9156819	9560517	403698
Chr14	9211313	9525803	314490	Chr14	9156819	9560517	403698
Chr14	9613990	9708266	94276	Chr14	9563752	9875498	311746
Chr14	9761453	9827313	65860	Chr14	9563752	9875498	311746
Chr14	9975787	10303776	327989	Chr14	9904800	10600757	695957
Chr14	10310992	10757175	446183	Chr14	9904800	10600757	695957
Chr14	24016262	24265652	249390	Chr14	24140071	24142255	2184
Chr14	24016262	24265652	249390	Chr14	24064227	24134352	70125
Chr14	24390426	24693708	303282	Chr14	24541467	24594217	52750
Chr15	19253	312944	293691	Chr15	0	1229705	1229705
Chr15	318986	338112	19126	Chr15	0	1229705	1229705
Chr15	354986	7468194	7113208	Chr15	3525814	3535061	9247
Chr15	354986	7468194	7113208	Chr15	3563573	3563736	163
Chr15	354986	7468194	7113208	Chr15	3621964	3632603	10639
Chr15	354986	7468194	7113208	Chr15	3634211	3636723	2512
Chr15	354986	7468194	7113208	Chr15	3639650	3646918	7268
Chr15	354986	7468194	7113208	Chr15	3705204	3706923	1719
Chr15	354986	7468194	7113208	Chr15	4474251	4476915	2664
Chr15	354986	7468194	7113208	Chr15	4524972	4526684	1712
Chr15	354986	7468194	7113208	Chr15	4661200	4663463	2263
Chr15	354986	7468194	7113208	Chr15	4676851	4678906	2055
Chr15	354986	7468194	7113208	Chr15	4696034	4698871	2837
Chr15	354986	7468194	7113208	Chr15	5006668	5010499	3831
Chr15	354986	7468194	7113208	Chr15	5016848	5026261	9413
Chr15	354986	7468194	7113208	Chr15	5037561	5043430	5869
Chr15	354986	7468194	7113208	Chr15	5106010	5109905	3895
Chr15	354986	7468194	7113208	Chr15	5394729	5397560	2831
Chr15	354986	7468194	7113208	Chr15	5409637	5410311	674
Chr15	354986	7468194	7113208	Chr15	5413552	5416412	2860
Chr15	354986	7468194	7113208	Chr15	5424343	5435676	11333
Chr15	354986	7468194	7113208	Chr15	6153130	6159763	6633
Chr15	354986	7468194	7113208	Chr15	6161665	6174135	12470
Chr15	354986	7468194	7113208	Chr15	6202362	6204776	2414
Chr15	354986	7468194	7113208	Chr15	6373853	6384180	10327
Chr15	354986	7468194	7113208	Chr15	6588095	6599474	11379
Chr15	354986	7468194	7113208	Chr15	6697740	6699025	1285
Chr15	354986	7468194	7113208	Chr15	6708617	6710293	1676
Chr15	354986	7468194	7113208	Chr15	6711826	6716581	4755
Chr15	354986	7468194	7113208	Chr15	6719317	6720274	957
Chr15	354986	7468194	7113208	Chr15	6834513	6847688	13175
Chr15	354986	7468194	7113208	Chr15	6853154	6858126	4972
Chr15	354986	7468194	7113208	Chr15	6865933	6867581	1648
Chr15	354986	7468194	7113208	Chr15	6870553	6871188	635
Chr15	354986	7468194	7113208	Chr15	6872855	6873248	393
Chr15	354986	7468194	7113208	Chr15	3601319	3619973	18654
Chr15	354986	7468194	7113208	Chr15	3687628	3703434	15806
Chr15	354986	7468194	7113208	Chr15	3708244	3733505	25261
Chr15	354986	7468194	7113208	Chr15	4487230	4491187	3957
Chr15	354986	7468194	7113208	Chr15	4552334	4555116	2782
Chr15	354986	7468194	7113208	Chr15	4556909	4577544	20635
Chr15	354986	7468194	7113208	Chr15	4597417	4607676	10259
Chr15	354986	7468194	7113208	Chr15	4608949	4651005	42056
Chr15	354986	7468194	7113208	Chr15	4682560	4686374	3814
Chr15	354986	7468194	7113208	Chr15	4699789	4712499	12710
Chr15	354986	7468194	7113208	Chr15	4989165	5005377	16212
Chr15	354986	7468194	7113208	Chr15	5057970	5084719	26749
Chr15	354986	7468194	7113208	Chr15	5094558	5102279	7721
Chr15	354986	7468194	7113208	Chr15	5113627	5226262	112635
Chr15	354986	7468194	7113208	Chr15	5278539	5298646	20107
Chr15	354986	7468194	7113208	Chr15	5398432	5409269	10837
Chr15	354986	7468194	7113208	Chr15	5437913	5493791	55878
Chr15	354986	7468194	7113208	Chr15	6093469	6104383	10914
Chr15	354986	7468194	7113208	Chr15	6140170	6149508	9338
Chr15	354986	7468194	7113208	Chr15	6175155	6182894	7739
Chr15	354986	7468194	7113208	Chr15	6209945	6253315	43370
Chr15	354986	7468194	7113208	Chr15	6524546	6538430	13884
Chr15	354986	7468194	7113208	Chr15	6555083	6583883	28800
Chr15	354986	7468194	7113208	Chr15	7093158	7184961	91803
Chr15	354986	7468194	7113208	Chr15	7389042	7396220	7178
Chr15	354986	7468194	7113208	Chr15	7396705	7467188	70483
Chr15	354986	7468194	7113208	Chr15	3536651	3542820	6169
Chr15	354986	7468194	7113208	Chr15	3659788	3674274	14486
Chr15	354986	7468194	7113208	Chr15	4724689	4986571	261882
Chr15	354986	7468194	7113208	Chr15	5308635	5393916	85281
Chr15	354986	7468194	7113208	Chr15	5499725	5517543	17818
Chr15	354986	7468194	7113208	Chr15	5519378	6085313	565935
Chr15	354986	7468194	7113208	Chr15	6386907	6522657	135750
Chr15	354986	7468194	7113208	Chr15	6603124	6696284	93160
Chr15	354986	7468194	7113208	Chr15	6722640	6829479	106839
Chr15	354986	7468194	7113208	Chr15	6890437	7061067	170630
Chr15	354986	7468194	7113208	Chr15	0	1229705	1229705
Chr15	354986	7468194	7113208	Chr15	1234427	3467780	2233353
Chr15	354986	7468194	7113208	Chr15	3743653	4453984	710331
Chr15	354986	7468194	7113208	Chr15	5237669	5273076	35407
Chr15	354986	7468194	7113208	Chr15	6256679	6361171	104492
Chr15	354986	7468194	7113208	Chr15	7204847	7373718	168871
Chr15	53529570	53572374	42804	Chr15	53540999	53551002	10003
Chr15	53529570	53572374	42804	Chr15	53567697	53896152	328455
Chr15	53572375	53603309	30934	Chr15	53567697	53896152	328455
Chr15	53623759	53625658	1899	Chr15	53567697	53896152	328455
Chr15	53634070	53686831	52761	Chr15	53567697	53896152	328455
Chr15	53687247	53891446	204199	Chr15	53567697	53896152	328455
Chr15	53891460	54307026	415566	Chr15	53916758	53918204	1446
Chr15	53891460	54307026	415566	Chr15	53994171	53994448	277
Chr15	53891460	54307026	415566	Chr15	53567697	53896152	328455
Chr15	55131885	55167484	35599	Chr15	55140904	55140910	6
Chr15	55585900	55751704	165804	Chr15	55651016	55684450	33434
Chr15	56691848	56944927	253079	Chr15	56794605	56798435	3830
Chr15	56691848	56944927	253079	Chr15	56834649	56834650	1
Chr15	56691848	56944927	253079	Chr15	56802319	56825746	23427
Chr15	58462136	58579017	116881	Chr15	58497057	58498799	1742
Chr15	86872113	87887815	1015702	Chr15	87697037	87697048	11
Chr15	86872113	87887815	1015702	Chr15	86908740	86944889	36149
Chr15	86872113	87887815	1015702	Chr15	87279145	87695475	416330
Chr15	88713680	88849226	135546	Chr15	88761098	88775829	14731
Chr16	18965	445988	427023	Chr16	0	2565171	2565171
Chr16	465814	485168	19354	Chr16	0	2565171	2565171
Chr16	488615	499841	11226	Chr16	0	2565171	2565171
Chr16	525426	4019340	3493914	Chr16	3639563	3653476	13913
Chr16	525426	4019340	3493914	Chr16	3745356	3749631	4275
Chr16	525426	4019340	3493914	Chr16	3789671	3792143	2472
Chr16	525426	4019340	3493914	Chr16	3688256	3725501	37245
Chr16	525426	4019340	3493914	Chr16	0	2565171	2565171
Chr16	525426	4019340	3493914	Chr16	2714870	3618906	904036
Chr16	525426	4019340	3493914	Chr16	3941412	4270881	329469
Chr16	4205840	4491847	286007	Chr16	4290483	4385695	95212
Chr16	4205840	4491847	286007	Chr16	4388994	4487981	98987
Chr16	4205840	4491847	286007	Chr16	3941412	4270881	329469
Chr16	4976445	5394548	418103	Chr16	5207683	5207749	66
Chr16	4976445	5394548	418103	Chr16	5210342	5214211	3869
Chr16	4976445	5394548	418103	Chr16	5217440	5225572	8132
Chr16	4976445	5394548	418103	Chr16	5255447	5257165	1718
Chr16	4976445	5394548	418103	Chr16	5258710	5259227	517
Chr16	4976445	5394548	418103	Chr16	5262062	5267087	5025
Chr16	4976445	5394548	418103	Chr16	5302339	5302735	396
Chr16	4976445	5394548	418103	Chr16	5179723	5204042	24319
Chr16	4976445	5394548	418103	Chr16	5269849	5286411	16562
Chr16	4976445	5394548	418103	Chr16	5288923	5292856	3933
Chr16	4976445	5394548	418103	Chr16	5386932	5426157	39225
Chr16	4976445	5394548	418103	Chr16	4970172	4983089	12917
Chr16	4976445	5394548	418103	Chr16	5002275	5174288	172013
Chr16	4976445	5394548	418103	Chr16	5305500	5382756	77256
Chr16	4976445	5394548	418103	Chr16	5236581	5249147	12566
Chr16	7185251	7661181	475930	Chr16	7537994	7543296	5302
Chr16	7185251	7661181	475930	Chr16	7217234	7243947	26713
Chr16	7185251	7661181	475930	Chr16	7248657	7295173	46516
Chr16	7185251	7661181	475930	Chr16	7486843	7495374	8531
Chr16	7185251	7661181	475930	Chr16	6600718	7216467	615749
Chr16	7185251	7661181	475930	Chr16	7544377	7809987	265610
Chr16	7185251	7661181	475930	Chr16	7337088	7484810	147722
Chr16	7785458	7953720	168262	Chr16	7816040	7839667	23627
Chr16	7785458	7953720	168262	Chr16	7544377	7809987	265610
Chr16	7785458	7953720	168262	Chr16	7840437	8928811	1088374
Chr16	8189981	12160847	3970866	Chr16	9357212	9358196	984
Chr16	8189981	12160847	3970866	Chr16	9585123	9589318	4195
Chr16	8189981	12160847	3970866	Chr16	10232945	10235092	2147
Chr16	8189981	12160847	3970866	Chr16	10636347	10638587	2240
Chr16	8189981	12160847	3970866	Chr16	10738310	10745137	6827
Chr16	8189981	12160847	3970866	Chr16	10921322	10921988	666
Chr16	8189981	12160847	3970866	Chr16	10930237	10943494	13257
Chr16	8189981	12160847	3970866	Chr16	11011038	11012522	1484
Chr16	8189981	12160847	3970866	Chr16	11013242	11016313	3071
Chr16	8189981	12160847	3970866	Chr16	11185017	11186760	1743
Chr16	8189981	12160847	3970866	Chr16	11190586	11204487	13901
Chr16	8189981	12160847	3970866	Chr16	11485981	11489567	3586
Chr16	8189981	12160847	3970866	Chr16	11559785	11559995	210
Chr16	8189981	12160847	3970866	Chr16	11562952	11566382	3430
Chr16	8189981	12160847	3970866	Chr16	11586096	11590718	4622
Chr16	8189981	12160847	3970866	Chr16	11599971	11609727	9756
Chr16	8189981	12160847	3970866	Chr16	11617628	11618301	673
Chr16	8189981	12160847	3970866	Chr16	11629717	11630799	1082
Chr16	8189981	12160847	3970866	Chr16	11723354	11726677	3323
Chr16	8189981	12160847	3970866	Chr16	9360220	9412047	51827
Chr16	8189981	12160847	3970866	Chr16	9497393	9517291	19898
Chr16	8189981	12160847	3970866	Chr16	9538473	9561235	22762
Chr16	8189981	12160847	3970866	Chr16	9597570	9664199	66629
Chr16	8189981	12160847	3970866	Chr16	9720189	9787933	67744
Chr16	8189981	12160847	3970866	Chr16	10095397	10145119	49722
Chr16	8189981	12160847	3970866	Chr16	10376096	10432363	56267
Chr16	8189981	12160847	3970866	Chr16	10433746	10449078	15332
Chr16	8189981	12160847	3970866	Chr16	10643390	10653205	9815
Chr16	8189981	12160847	3970866	Chr16	10682262	10682742	480
Chr16	8189981	12160847	3970866	Chr16	10900704	10913233	12529
Chr16	8189981	12160847	3970866	Chr16	11023111	11035501	12390
Chr16	8189981	12160847	3970866	Chr16	11506851	11528921	22070
Chr16	8189981	12160847	3970866	Chr16	11540118	11559433	19315
Chr16	8189981	12160847	3970866	Chr16	11572338	11583909	11571
Chr16	8189981	12160847	3970866	Chr16	11684326	11707409	23083
Chr16	8189981	12160847	3970866	Chr16	12065303	12080260	14957
Chr16	8189981	12160847	3970866	Chr16	8938876	9335012	396136
Chr16	8189981	12160847	3970866	Chr16	9679596	9718784	39188
Chr16	8189981	12160847	3970866	Chr16	9810793	10084685	273892
Chr16	8189981	12160847	3970866	Chr16	11114104	11184439	70335
Chr16	8189981	12160847	3970866	Chr16	11909835	11963335	53500
Chr16	8189981	12160847	3970866	Chr16	9416967	9468009	51042
Chr16	8189981	12160847	3970866	Chr16	11529929	11536592	6663
Chr16	8189981	12160847	3970866	Chr16	7840437	8928811	1088374
Chr16	18000715	18430570	429855	Chr16	18033931	18040806	6875
Chr16	18000715	18430570	429855	Chr16	18051321	18184860	133539
Chr16	19072894	19381705	308811	Chr16	19161564	19162773	1209
Chr16	19072894	19381705	308811	Chr16	19234877	19242885	8008
Chr16	19072894	19381705	308811	Chr16	19348574	19366101	17527
Chr16	19072894	19381705	308811	Chr16	19245756	19283203	37447
Chr16	19492798	19504376	11578	Chr16	19401054	19518508	117454
Chr16	19510352	19512850	2498	Chr16	19401054	19518508	117454
Chr16	19808305	19823656	15351	Chr16	19782278	19840637	58359
Chr16	19910093	19912119	2026	Chr16	19896993	19991994	95001
Chr16	19950951	19964571	13620	Chr16	19896993	19991994	95001
Chr16	20238259	20253312	15053	Chr16	20232377	20248390	16013
Chr16	20315136	20431974	116838	Chr16	20362520	20461596	99076
Chr16	20433786	20444144	10358	Chr16	20362520	20461596	99076
Chr16	20451750	20477313	25563	Chr16	20362520	20461596	99076
Chr16	20543674	20627677	84003	Chr16	20569408	20629883	60475
Chr16	20634585	20956091	321506	Chr16	20894003	20899491	5488
Chr16	20634585	20956091	321506	Chr16	20720245	20736646	16401
Chr16	20634585	20956091	321506	Chr16	20846683	20880633	33950
Chr16	68200554	68390193	189639	Chr16	68241771	68356642	114871
Chr17	19340	106611	87271	Chr17	0	524715	524715
Chr17	121673	148414	26741	Chr17	0	524715	524715
Chr17	163476	332447	168971	Chr17	0	524715	524715
Chr17	336959	348155	11196	Chr17	0	524715	524715
Chr17	348810	360157	11347	Chr17	0	524715	524715
Chr17	368912	389316	20404	Chr17	0	524715	524715
Chr17	389506	6280736	5891230	Chr17	4019295	4019741	446
Chr17	389506	6280736	5891230	Chr17	4086093	4086835	742
Chr17	389506	6280736	5891230	Chr17	4105334	4108251	2917
Chr17	389506	6280736	5891230	Chr17	3585390	3592697	7307
Chr17	389506	6280736	5891230	Chr17	5147833	5219379	71546
Chr17	389506	6280736	5891230	Chr17	0	524715	524715
Chr17	389506	6280736	5891230	Chr17	540961	760939	219978
Chr17	389506	6280736	5891230	Chr17	3597925	3840080	242155
Chr17	389506	6280736	5891230	Chr17	3856692	4000718	144026
Chr17	389506	6280736	5891230	Chr17	4023630	4083894	60264
Chr17	389506	6280736	5891230	Chr17	762823	3579148	2816325
Chr17	389506	6280736	5891230	Chr17	4112999	5141419	1028420
Chr17	389506	6280736	5891230	Chr17	5222309	6064985	842676
Chr17	389506	6280736	5891230	Chr17	6070534	6325451	254917
Chr17	6280741	8748606	2467865	Chr17	8028342	8032741	4399
Chr17	6280741	8748606	2467865	Chr17	8134743	8139533	4790
Chr17	6280741	8748606	2467865	Chr17	8543850	8548664	4814
Chr17	6280741	8748606	2467865	Chr17	8583664	8584329	665
Chr17	6280741	8748606	2467865	Chr17	8644254	8647510	3256
Chr17	6280741	8748606	2467865	Chr17	6340210	6341337	1127
Chr17	6280741	8748606	2467865	Chr17	7489152	7561453	72301
Chr17	6280741	8748606	2467865	Chr17	7884945	7907532	22587
Chr17	6280741	8748606	2467865	Chr17	7938433	7952576	14143
Chr17	6280741	8748606	2467865	Chr17	8033809	8047994	14185
Chr17	6280741	8748606	2467865	Chr17	8108258	8122383	14125
Chr17	6280741	8748606	2467865	Chr17	8155559	8223384	67825
Chr17	6280741	8748606	2467865	Chr17	8598699	8642447	43748
Chr17	6280741	8748606	2467865	Chr17	7562010	7644658	82648
Chr17	6280741	8748606	2467865	Chr17	7689193	7763009	73816
Chr17	6280741	8748606	2467865	Chr17	7763621	7878239	114618
Chr17	6280741	8748606	2467865	Chr17	7984554	8000771	16217
Chr17	6280741	8748606	2467865	Chr17	8240095	8289892	49797
Chr17	6280741	8748606	2467865	Chr17	6070534	6325451	254917
Chr17	6280741	8748606	2467865	Chr17	6343020	7484070	1141050
Chr17	6280741	8748606	2467865	Chr17	8322239	8485477	163238
Chr17	9193413	9329681	136268	Chr17	9221851	9223778	1927
Chr17	9193413	9329681	136268	Chr17	9240549	9247464	6915
Chr17	23261361	23552295	290934	Chr17	23281170	23311756	30586
Chr17	23261361	23552295	290934	Chr17	23331366	23378953	47587
Chr17	23261361	23552295	290934	Chr17	23403201	23516899	113698
Chr17	55034748	55088940	54192	Chr17	55046016	55077894	31878
Chr17	79987439	80326314	338875	Chr17	80279854	80280964	1110
Chr17	79987439	80326314	338875	Chr17	80060522	80076306	15784
Chr17	79987439	80326314	338875	Chr17	80121574	80162986	41412
Chr17	79987439	80326314	338875	Chr17	80253908	80268467	14559
Chr17	80495613	80528669	33056	Chr17	80503609	80510841	7232
Chr17	82485950	82548604	62654	Chr17	82487549	82496520	8971
Chr17	82485950	82548604	62654	Chr17	82509611	82517524	7913
Chr17	82485950	82548604	62654	Chr17	82539666	82560606	20940
Chr18	19755	148831	129076	Chr18	0	529991	529991
Chr18	152660	333875	181215	Chr18	0	529991	529991
Chr18	337378	348574	11196	Chr18	0	529991	529991
Chr18	349229	360576	11347	Chr18	0	529991	529991
Chr18	369331	5223956	4854625	Chr18	1092629	1093009	380
Chr18	369331	5223956	4854625	Chr18	4135504	4141059	5555
Chr18	369331	5223956	4854625	Chr18	4937944	4940645	2701
Chr18	369331	5223956	4854625	Chr18	4261623	4279979	18356
Chr18	369331	5223956	4854625	Chr18	4874457	4896653	22196
Chr18	369331	5223956	4854625	Chr18	5060329	5110721	50392
Chr18	369331	5223956	4854625	Chr18	5114665	5209305	94640
Chr18	369331	5223956	4854625	Chr18	0	529991	529991
Chr18	369331	5223956	4854625	Chr18	4398573	4483070	84497
Chr18	369331	5223956	4854625	Chr18	4491055	4852100	361045
Chr18	369331	5223956	4854625	Chr18	4978778	5059870	81092
Chr18	369331	5223956	4854625	Chr18	537199	1077174	539975
Chr18	369331	5223956	4854625	Chr18	1098208	4116703	3018495
Chr18	5391824	6497137	1105313	Chr18	5781166	5781223	57
Chr18	5391824	6497137	1105313	Chr18	6048570	6057091	8521
Chr18	5391824	6497137	1105313	Chr18	5380661	5392778	12117
Chr18	5391824	6497137	1105313	Chr18	5431353	5501392	70039
Chr18	5391824	6497137	1105313	Chr18	5720694	5744265	23571
Chr18	5391824	6497137	1105313	Chr18	5837297	5866714	29417
Chr18	5391824	6497137	1105313	Chr18	5914823	5949080	34257
Chr18	5391824	6497137	1105313	Chr18	6197935	6235042	37107
Chr18	5391824	6497137	1105313	Chr18	5611608	5639900	28292
Chr18	5391824	6497137	1105313	Chr18	5885522	5912074	26552
Chr18	5391824	6497137	1105313	Chr18	5976160	6029693	53533
Chr18	5391824	6497137	1105313	Chr18	6237605	6328112	90507
Chr18	6779497	6783898	4401	Chr18	6782057	6784065	2008
Chr18	34092660	34560967	468307	Chr18	34203252	34238836	35584
Chr18	34092660	34560967	468307	Chr18	34422665	34480800	58135
Chr18	50131149	50134196	3047	Chr18	50131199	50134113	2914
Chr18	55543572	55621010	77438	Chr18	55583759	55584348	589
Chr18	56923483	57326964	403481	Chr18	56963434	57150504	187070
Chr18	63689526	64037904	348378	Chr18	63740482	63747575	7093
Chr18	63689526	64037904	348378	Chr18	63828439	63838209	9770
Chr18	63689526	64037904	348378	Chr18	63917904	64011454	93550
Chr18	64259035	64356821	97786	Chr18	64309387	64321563	12176
Chr18	66025679	66548246	522567	Chr18	66477610	66480129	2519
Chr18	67671840	67919809	247969	Chr18	67906008	68074726	168718
Chr18	67919849	67976343	56494	Chr18	67906008	68074726	168718
Chr18	67997588	68101930	104342	Chr18	67906008	68074726	168718
Chr18	68154863	68262447	107584	Chr18	68247980	68249332	1352
Chr18	68154863	68262447	107584	Chr18	68259543	68261469	1926
Chr18	68154863	68262447	107584	Chr18	68216132	68243826	27694
Chr18	68314135	68339195	25060	Chr18	68269748	68337475	67727
Chr18	69363884	69385309	21425	Chr18	69366734	69376571	9837
Chr18	69452460	69775844	323384	Chr18	69477141	69477450	309
Chr18	69452460	69775844	323384	Chr18	69483517	69484975	1458
Chr18	69452460	69775844	323384	Chr18	69582275	69589954	7679
Chr18	69452460	69775844	323384	Chr18	69617115	69674448	57333
Chr18	69452460	69775844	323384	Chr18	69708971	69750657	41686
Chr18	69832260	69845498	13238	Chr18	69832764	69833962	1198
Chr18	70463709	70643074	179365	Chr18	70592608	70595671	3063
Chr18	70463709	70643074	179365	Chr18	70528824	70579896	51072
Chr19	18018	430071	412053	Chr19	0	771530	771530
Chr19	451361	12695171	12243810	Chr19	1623357	1630663	7306
Chr19	451361	12695171	12243810	Chr19	2066110	2077652	11542
Chr19	451361	12695171	12243810	Chr19	3005358	3007986	2628
Chr19	451361	12695171	12243810	Chr19	12692821	12692986	165
Chr19	451361	12695171	12243810	Chr19	1639838	1695558	55720
Chr19	451361	12695171	12243810	Chr19	1984005	2052306	68301
Chr19	451361	12695171	12243810	Chr19	2997332	2999960	2628
Chr19	451361	12695171	12243810	Chr19	9454496	9563007	108511
Chr19	451361	12695171	12243810	Chr19	9573976	9592696	18720
Chr19	451361	12695171	12243810	Chr19	9600322	9663289	62967
Chr19	451361	12695171	12243810	Chr19	0	771530	771530
Chr19	451361	12695171	12243810	Chr19	1378148	1622782	244634
Chr19	451361	12695171	12243810	Chr19	1696774	1980877	284103
Chr19	451361	12695171	12243810	Chr19	3483733	4073355	589622
Chr19	451361	12695171	12243810	Chr19	5535383	5783361	247978
Chr19	451361	12695171	12243810	Chr19	10902676	11205577	302901
Chr19	451361	12695171	12243810	Chr19	11637716	11665820	28104
Chr19	451361	12695171	12243810	Chr19	11674047	12330936	656889
Chr19	451361	12695171	12243810	Chr19	774082	1370141	596059
Chr19	451361	12695171	12243810	Chr19	2082424	2993123	910699
Chr19	451361	12695171	12243810	Chr19	3048408	3482379	433971
Chr19	451361	12695171	12243810	Chr19	4076063	5481328	1405265
Chr19	451361	12695171	12243810	Chr19	9191075	9443994	252919
Chr19	451361	12695171	12243810	Chr19	9688217	10897602	1209385
Chr19	451361	12695171	12243810	Chr19	11217530	11635267	417737
Chr19	451361	12695171	12243810	Chr19	12358835	12679193	320358
Chr19	451361	12695171	12243810	Chr19	5785981	9176398	3390417
Chr19	21845282	21861995	16713	Chr19	21843680	21852833	9153
Chr19	54118666	54217785	99119	Chr19	54148091	54188048	39957
Chr19	55941085	55956766	15681	Chr19	55948340	55954198	5858
Chr19	55995762	56136295	140533	Chr19	56042913	56108651	65738
Chr19	76040035	76158688	118653	Chr19	76118836	76175762	56926
Chr20	26360	11355644	11329284	Chr20	3289142	3684630	395488
Chr20	26360	11355644	11329284	Chr20	3689745	4041884	352139
Chr20	26360	11355644	11329284	Chr20	4293041	4902133	609092
Chr20	26360	11355644	11329284	Chr20	8706930	9091884	384954
Chr20	26360	11355644	11329284	Chr20	9093502	9422990	329488
Chr20	26360	11355644	11329284	Chr20	31554	3079997	3048443
Chr20	26360	11355644	11329284	Chr20	3082659	3281980	199321
Chr20	26360	11355644	11329284	Chr20	4048077	4291772	243695
Chr20	26360	11355644	11329284	Chr20	9425824	10914464	1488640
Chr20	26360	11355644	11329284	Chr20	10933178	13185998	2252820
Chr20	26360	11355644	11329284	Chr20	4905394	8670190	3764796
Chr20	11437611	11679091	241480	Chr20	10933178	13185998	2252820
Chr20	11731277	11786814	55537	Chr20	10933178	13185998	2252820
Chr20	11806498	12131311	324813	Chr20	10933178	13185998	2252820
Chr20	12137406	12177401	39995	Chr20	10933178	13185998	2252820
Chr20	12183494	12241226	57732	Chr20	10933178	13185998	2252820
Chr20	12257902	12783568	525666	Chr20	10933178	13185998	2252820
Chr20	13179962	13784558	604596	Chr20	10933178	13185998	2252820
Chr20	13179962	13784558	604596	Chr20	13190037	13967550	777513
Chr20	13862926	14493641	630715	Chr20	13190037	13967550	777513
Chr20	13862926	14493641	630715	Chr20	13989935	15313288	1323353
Chr20	14712498	15652686	940188	Chr20	13989935	15313288	1323353
Chr20	14712498	15652686	940188	Chr20	15320240	16240475	920235
Chr20	16056892	16614084	557192	Chr20	16478185	16479178	993
Chr20	16056892	16614084	557192	Chr20	16463684	16476946	13262
Chr20	16056892	16614084	557192	Chr20	16244939	16457259	212320
Chr20	16056892	16614084	557192	Chr20	16486496	16589239	102743
Chr20	16056892	16614084	557192	Chr20	16611845	16649105	37260
Chr20	16056892	16614084	557192	Chr20	15320240	16240475	920235
Chr20	16642558	16986025	343467	Chr20	16731518	16738483	6965
Chr20	16642558	16986025	343467	Chr20	16746082	16758127	12045
Chr20	16642558	16986025	343467	Chr20	16763518	16770872	7354
Chr20	16642558	16986025	343467	Chr20	16815611	16821150	5539
Chr20	16642558	16986025	343467	Chr20	16654691	16718140	63449
Chr20	16642558	16986025	343467	Chr20	16789558	16808034	18476
Chr20	16642558	16986025	343467	Chr20	16836264	16847323	11059
Chr20	16642558	16986025	343467	Chr20	16611845	16649105	37260
Chr20	16642558	16986025	343467	Chr20	16883066	17004703	121637
Chr20	17024729	17117003	92274	Chr20	17038622	17093765	55143
Chr20	17135145	17223996	88851	Chr20	17209148	17252647	43499
Chr20	17135145	17223996	88851	Chr20	17130611	17205041	74430
Chr20	17262533	17820653	558120	Chr20	17264087	17281973	17886
Chr20	17262533	17820653	558120	Chr20	17283328	17455828	172500
Chr20	17262533	17820653	558120	Chr20	17490448	17694450	204002
Chr20	52473013	52482092	9079	Chr20	52473226	52479076	5850
Chr20	82946596	82968179	21583	Chr20	82955296	82961213	5917
Chr20	85485355	85495538	10183	Chr20	85485219	85491016	5797
Chr20	89248143	89280189	32046	Chr20	89273341	89285685	12344
Chr21	20508	223987	203479	Chr21	0	2766508	2766508
Chr21	280397	295879	15482	Chr21	0	2766508	2766508
Chr21	307194	318408	11214	Chr21	0	2766508	2766508
Chr21	326034	356165	30131	Chr21	0	2766508	2766508
Chr21	358887	8735740	8376853	Chr21	8021479	8025163	3684
Chr21	358887	8735740	8376853	Chr21	8026799	8028075	1276
Chr21	358887	8735740	8376853	Chr21	8028442	8032356	3914
Chr21	358887	8735740	8376853	Chr21	8114845	8118444	3599
Chr21	358887	8735740	8376853	Chr21	8132303	8139815	7512
Chr21	358887	8735740	8376853	Chr21	8150828	8155978	5150
Chr21	358887	8735740	8376853	Chr21	8196464	8196877	413
Chr21	358887	8735740	8376853	Chr21	8197643	8207735	10092
Chr21	358887	8735740	8376853	Chr21	8276046	8278357	2311
Chr21	358887	8735740	8376853	Chr21	8291754	8295394	3640
Chr21	358887	8735740	8376853	Chr21	8297492	8298831	1339
Chr21	358887	8735740	8376853	Chr21	8301161	8302364	1203
Chr21	358887	8735740	8376853	Chr21	4103787	4128389	24602
Chr21	358887	8735740	8376853	Chr21	7998303	8017445	19142
Chr21	358887	8735740	8376853	Chr21	8106703	8110428	3725
Chr21	358887	8735740	8376853	Chr21	8141353	8148173	6820
Chr21	358887	8735740	8376853	Chr21	8156305	8163480	7175
Chr21	358887	8735740	8376853	Chr21	8169061	8183768	14707
Chr21	358887	8735740	8376853	Chr21	8230399	8251503	21104
Chr21	358887	8735740	8376853	Chr21	8305359	8310271	4912
Chr21	358887	8735740	8376853	Chr21	8312022	8324514	12492
Chr21	358887	8735740	8376853	Chr21	8686530	8736802	50272
Chr21	358887	8735740	8376853	Chr21	0	2766508	2766508
Chr21	358887	8735740	8376853	Chr21	2776905	4097033	1320128
Chr21	358887	8735740	8376853	Chr21	4132589	7977929	3845340
Chr21	358887	8735740	8376853	Chr21	8327823	8680730	352907
Chr21	8735768	12720973	3985205	Chr21	8686530	8736802	50272
Chr21	8735768	12720973	3985205	Chr21	12687094	12698281	11187
Chr21	8735768	12720973	3985205	Chr21	8748984	12680578	3931594
Chr21	14245659	14728479	482820	Chr21	14196232	14255397	59165
Chr21	14245659	14728479	482820	Chr21	14289254	14307812	18558
Chr21	14245659	14728479	482820	Chr21	14267517	14288188	20671
Chr21	14245659	14728479	482820	Chr21	14316170	14473885	157715
Chr21	14245659	14728479	482820	Chr21	14495092	14604702	109610
Chr21	14245659	14728479	482820	Chr21	14618368	14722839	104471
Chr21	14893190	14937059	43869	Chr21	14925256	14999588	74332
Chr21	14939276	15387537	448261	Chr21	15129128	15134322	5194
Chr21	14939276	15387537	448261	Chr21	15155086	15194575	39489
Chr21	14939276	15387537	448261	Chr21	15233643	15284412	50769
Chr21	14939276	15387537	448261	Chr21	14925256	14999588	74332
Chr21	14939276	15387537	448261	Chr21	15014927	15090620	75693
Chr21	14939276	15387537	448261	Chr21	15196491	15231472	34981
Chr21	16668703	16736064	67361	Chr21	16711013	16718725	7712
Chr21	16742669	16984562	241893	Chr21	16758695	16966238	207543
Chr21	34631286	34682547	51261	Chr21	34672645	34672805	160
Chr21	35114168	35168420	54252	Chr21	35120246	35139947	19701
Chr21	68534843	68536048	1205	Chr21	68533909	68549026	15117
Chr21	73523855	73547450	23595	Chr21	73529237	73542694	13457
Chr21	82448547	82564635	116088	Chr21	82473484	82512897	39413
Chr21	84671565	85360371	688806	Chr21	84811696	84908223	96527
Chr21	84671565	85360371	688806	Chr21	85293196	85307206	14010
Chr21	84671565	85360371	688806	Chr21	85036006	85142744	106738
Chr21	84671565	85360371	688806	Chr21	85164775	85203468	38693
Chr21	85370051	85401577	31526	Chr21	85401533	85415799	14266
Chr22	18905	157457	138552	Chr22	0	676562	676562
Chr22	159758	170932	11174	Chr22	0	676562	676562
Chr22	173939	7903535	7729596	Chr22	2458049	2464484	6435
Chr22	173939	7903535	7729596	Chr22	2424581	2436211	11630
Chr22	173939	7903535	7729596	Chr22	2467818	2488853	21035
Chr22	173939	7903535	7729596	Chr22	3046593	3052520	5927
Chr22	173939	7903535	7729596	Chr22	5666893	5706061	39168
Chr22	173939	7903535	7729596	Chr22	5716088	5748693	32605
Chr22	173939	7903535	7729596	Chr22	5922549	5964654	42105
Chr22	173939	7903535	7729596	Chr22	0	676562	676562
Chr22	173939	7903535	7729596	Chr22	2147371	2416912	269541
Chr22	173939	7903535	7729596	Chr22	2495264	2726140	230876
Chr22	173939	7903535	7729596	Chr22	2726917	2881163	154246
Chr22	173939	7903535	7729596	Chr22	2892147	3027792	135645
Chr22	173939	7903535	7729596	Chr22	5753273	5910578	157305
Chr22	173939	7903535	7729596	Chr22	715178	2107980	1392802
Chr22	173939	7903535	7729596	Chr22	3053283	5660960	2607677
Chr22	173939	7903535	7729596	Chr22	5967529	7990035	2022506
Chr22	8293569	10344947	2051378	Chr22	8935647	8936878	1231
Chr22	8293569	10344947	2051378	Chr22	9038748	9039149	401
Chr22	8293569	10344947	2051378	Chr22	9099455	9102737	3282
Chr22	8293569	10344947	2051378	Chr22	8658048	8682752	24704
Chr22	8293569	10344947	2051378	Chr22	8947359	9037274	89915
Chr22	8293569	10344947	2051378	Chr22	9065522	9094073	28551
Chr22	8293569	10344947	2051378	Chr22	8691740	8839179	147439
Chr22	8293569	10344947	2051378	Chr22	8842998	8930163	87165
Chr22	8293569	10344947	2051378	Chr22	9040084	9044838	4754
Chr22	8293569	10344947	2051378	Chr22	9110699	9235981	125282
Chr22	8293569	10344947	2051378	Chr22	9524026	10337639	813613
Chr22	8293569	10344947	2051378	Chr22	9239519	9519838	280319
Chr22	8293569	10344947	2051378	Chr22	8003076	8653421	650345
Chr22	11447114	13977229	2530115	Chr22	12190791	12193987	3196
Chr22	11447114	13977229	2530115	Chr22	12265774	12271590	5816
Chr22	11447114	13977229	2530115	Chr22	12274388	12284795	10407
Chr22	11447114	13977229	2530115	Chr22	12288194	12289491	1297
Chr22	11447114	13977229	2530115	Chr22	12292564	12301292	8728
Chr22	11447114	13977229	2530115	Chr22	12339983	12342815	2832
Chr22	11447114	13977229	2530115	Chr22	12345429	12346651	1222
Chr22	11447114	13977229	2530115	Chr22	13042413	13045140	2727
Chr22	11447114	13977229	2530115	Chr22	13049551	13055391	5840
Chr22	11447114	13977229	2530115	Chr22	12156514	12189219	32705
Chr22	11447114	13977229	2530115	Chr22	12195029	12260587	65558
Chr22	11447114	13977229	2530115	Chr22	12353071	12359398	6327
Chr22	11447114	13977229	2530115	Chr22	12634480	12649442	14962
Chr22	11447114	13977229	2530115	Chr22	12768865	12786367	17502
Chr22	11447114	13977229	2530115	Chr22	12867887	12885209	17322
Chr22	11447114	13977229	2530115	Chr22	12886725	12945023	58298
Chr22	11447114	13977229	2530115	Chr22	13012794	13041353	28559
Chr22	11447114	13977229	2530115	Chr22	13059306	13079793	20487
Chr22	11447114	13977229	2530115	Chr22	11689934	11999643	309709
Chr22	11447114	13977229	2530115	Chr22	12003277	12154363	151086
Chr22	11447114	13977229	2530115	Chr22	12302352	12338342	35990
Chr22	11447114	13977229	2530115	Chr22	12650149	12767574	117425
Chr22	11447114	13977229	2530115	Chr22	12797894	12862137	64243
Chr22	11447114	13977229	2530115	Chr22	12946760	13012241	65481
Chr22	11447114	13977229	2530115	Chr22	13082247	13434244	351997
Chr22	11447114	13977229	2530115	Chr22	13462882	13538995	76113
Chr22	11447114	13977229	2530115	Chr22	13739039	13936862	197823
Chr22	11447114	13977229	2530115	Chr22	11403758	11688179	284421
Chr22	11447114	13977229	2530115	Chr22	12360427	12633609	273182
Chr22	11447114	13977229	2530115	Chr22	13544765	13737764	192999
Chr22	74591517	74750013	158496	Chr22	74678948	74689328	10380
Chr22	74591517	74750013	158496	Chr22	74714849	74762230	47381
Chr23	27888	257638	229750	Chr23	0	11769343	11769343
Chr23	275059	11865213	11590154	Chr23	11844038	11844324	286
Chr23	275059	11865213	11590154	Chr23	11777107	11840684	63577
Chr23	275059	11865213	11590154	Chr23	0	11769343	11769343
Chr23	14105206	14129164	23958	Chr23	12910822	14997555	2086733
Chr23	14130376	14184659	54283	Chr23	12910822	14997555	2086733
Chr23	14209141	14224919	15778	Chr23	12910822	14997555	2086733
Chr23	14234271	14303377	69106	Chr23	12910822	14997555	2086733
Chr23	14321726	14384249	62523	Chr23	12910822	14997555	2086733
Chr23	14388162	14402279	14117	Chr23	12910822	14997555	2086733
Chr23	14522508	14525618	3110	Chr23	12910822	14997555	2086733
Chr23	14652331	14722660	70329	Chr23	12910822	14997555	2086733
Chr23	14744876	14772542	27666	Chr23	12910822	14997555	2086733
Chr23	14842668	14890958	48290	Chr23	12910822	14997555	2086733
Chr23	14892150	14926380	34230	Chr23	12910822	14997555	2086733
Chr23	15121713	15213542	91829	Chr23	15208131	15211919	3788
Chr23	15217486	15220744	3258	Chr23	15217725	15218128	403
Chr23	40704192	41266259	562067	Chr23	41194887	41195169	282
Chr23	40704192	41266259	562067	Chr23	41196880	41196886	6
Chr23	40704192	41266259	562067	Chr23	41198439	41198624	185
Chr23	40704192	41266259	562067	Chr23	41199217	41199377	160
Chr23	40704192	41266259	562067	Chr23	41245501	41246200	699
Chr23	40704192	41266259	562067	Chr23	41185286	41192304	7018
Chr23	40704192	41266259	562067	Chr23	41203899	41224751	20852
Chr23	40704192	41266259	562067	Chr23	40927860	41183531	255671
Chr23	41512053	41517270	5217	Chr23	41512578	41512765	187
Chr23	41512053	41517270	5217	Chr23	41513072	41513501	429
Chr23	41901983	41904845	2862	Chr23	41899396	41902507	3111
Chr23	42701142	42861699	160557	Chr23	42781339	42781626	287
Chr23	42701142	42861699	160557	Chr23	42783751	42853342	69591
Chr23	43499415	43698740	199325	Chr23	43624973	43625311	338
Chr23	43499415	43698740	199325	Chr23	43555552	43584784	29232
Chr23	44134186	44193142	58956	Chr23	44176545	44184047	7502
Chr23	44386961	44452421	65460	Chr23	44408395	44429101	20706
Chr23	44505349	44620337	114988	Chr23	44578420	44586252	7832
Chr23	44885046	44979003	93957	Chr23	44901211	44913662	12451
Chr23	44885046	44979003	93957	Chr23	44921350	44934731	13381
Chr23	46231099	46303135	72036	Chr23	46255551	46259049	3498
Chr23	67423779	67540457	116678	Chr23	67508287	67509555	1268
Chr24	19741	9824374	9804633	Chr24	0	20429	20429
Chr24	19741	9824374	9804633	Chr24	4004189	4044282	40093
Chr24	19741	9824374	9804633	Chr24	1197493	1688356	490863
Chr24	19741	9824374	9804633	Chr24	2256484	2861786	605302
Chr24	19741	9824374	9804633	Chr24	9815552	9852611	37059
Chr24	19741	9824374	9804633	Chr24	26378	1173187	1146809
Chr24	19741	9824374	9804633	Chr24	1703737	2252889	549152
Chr24	19741	9824374	9804633	Chr24	2865472	3998760	1133288
Chr24	19741	9824374	9804633	Chr24	4045617	5173347	1127730
Chr24	19741	9824374	9804633	Chr24	5173900	5349049	175149
Chr24	19741	9824374	9804633	Chr24	8705021	9811388	1106367
Chr24	19741	9824374	9804633	Chr24	5368722	8689282	3320560
Chr24	10370065	10681543	311478	Chr24	10509372	10525374	16002
Chr24	10370065	10681543	311478	Chr24	10526462	11530936	1004474
Chr24	10684582	10802272	117690	Chr24	10526462	11530936	1004474
Chr24	10807455	10896382	88927	Chr24	10526462	11530936	1004474
Chr24	10896467	10905916	9449	Chr24	10526462	11530936	1004474
Chr24	12068613	12501442	432829	Chr24	12081791	12312731	230940
Chr24	46193534	46195441	1907	Chr24	46193330	46195471	2141
Chr24	74100555	74265780	165225	Chr24	74124782	74136281	11499
Chr24	74100555	74265780	165225	Chr24	74151053	74161742	10689
Chr24	74461342	74579444	118102	Chr24	74522180	74528320	6140
Chr24	74461342	74579444	118102	Chr24	74547683	74579711	32028
Chr25	18123	4965155	4947032	Chr25	4609947	4618667	8720
Chr25	18123	4965155	4947032	Chr25	4250393	4298362	47969
Chr25	18123	4965155	4947032	Chr25	4337340	4393193	55853
Chr25	18123	4965155	4947032	Chr25	0	676655	676655
Chr25	18123	4965155	4947032	Chr25	2868160	3006393	138233
Chr25	18123	4965155	4947032	Chr25	3365774	3758951	393177
Chr25	18123	4965155	4947032	Chr25	3763869	4150563	386694
Chr25	18123	4965155	4947032	Chr25	4399356	4504459	105103
Chr25	18123	4965155	4947032	Chr25	4566620	4593851	27231
Chr25	18123	4965155	4947032	Chr25	4647241	4839287	192046
Chr25	18123	4965155	4947032	Chr25	679124	2858378	2179254
Chr25	18123	4965155	4947032	Chr25	3007901	3358961	351060
Chr25	18123	4965155	4947032	Chr25	4157179	4245756	88577
Chr25	18123	4965155	4947032	Chr25	4853802	5820441	966639
Chr25	4966751	5613587	646836	Chr25	4853802	5820441	966639
Chr25	5615183	5860578	245395	Chr25	4853802	5820441	966639
Chr25	8306231	8362649	56418	Chr25	8339242	8339552	310
Chr25	22837119	22868448	31329	Chr25	22848165	22858558	10393
Chr25	41532263	41540288	8025	Chr25	41539599	41550443	10844
Chr25	41540409	41549879	9470	Chr25	41539599	41550443	10844
Chr25	41550435	41554347	3912	Chr25	41539599	41550443	10844
Chr25	41561030	41618123	57093	Chr25	41578431	41608504	30073
Chr25	48122512	48639822	517310	Chr25	48212902	48652870	439968
Chr26	19232	8853487	8834255	Chr26	7557015	7559894	2879
Chr26	19232	8853487	8834255	Chr26	8613094	8617657	4563
Chr26	19232	8853487	8834255	Chr26	8620861	8624574	3713
Chr26	19232	8853487	8834255	Chr26	8752608	8752719	111
Chr26	19232	8853487	8834255	Chr26	1397031	1416239	19208
Chr26	19232	8853487	8834255	Chr26	7566786	7583774	16988
Chr26	19232	8853487	8834255	Chr26	8319815	8373364	53549
Chr26	19232	8853487	8834255	Chr26	8427992	8477051	49059
Chr26	19232	8853487	8834255	Chr26	8525106	8546740	21634
Chr26	19232	8853487	8834255	Chr26	8547645	8582343	34698
Chr26	19232	8853487	8834255	Chr26	8587188	8602680	15492
Chr26	19232	8853487	8834255	Chr26	8687855	8707037	19182
Chr26	19232	8853487	8834255	Chr26	8824882	8833658	8776
Chr26	19232	8853487	8834255	Chr26	1174861	1391848	216987
Chr26	19232	8853487	8834255	Chr26	1421608	1471528	49920
Chr26	19232	8853487	8834255	Chr26	2115589	2529770	414181
Chr26	19232	8853487	8834255	Chr26	7399009	7520688	121679
Chr26	19232	8853487	8834255	Chr26	7599575	8310584	711009
Chr26	19232	8853487	8834255	Chr26	8629127	8661606	32479
Chr26	19232	8853487	8834255	Chr26	0	1173915	1173915
Chr26	19232	8853487	8834255	Chr26	1488165	2106813	618648
Chr26	19232	8853487	8834255	Chr26	2538828	7341403	4802575
Chr26	50709452	50745944	36492	Chr26	50726537	50729320	2783
Chr26	60122657	60186437	63780	Chr26	60154738	60177369	22631
Chr27	18882	8947303	8928421	Chr27	8133528	8136319	2791
Chr27	18882	8947303	8928421	Chr27	8211829	8215784	3955
Chr27	18882	8947303	8928421	Chr27	8226328	8230165	3837
Chr27	18882	8947303	8928421	Chr27	676462	714187	37725
Chr27	18882	8947303	8928421	Chr27	1744697	1774153	29456
Chr27	18882	8947303	8928421	Chr27	5140677	5201467	60790
Chr27	18882	8947303	8928421	Chr27	5354603	5369035	14432
Chr27	18882	8947303	8928421	Chr27	5931377	5963044	31667
Chr27	18882	8947303	8928421	Chr27	7473491	7504675	31184
Chr27	18882	8947303	8928421	Chr27	8028225	8086777	58552
Chr27	18882	8947303	8928421	Chr27	8189182	8198944	9762
Chr27	18882	8947303	8928421	Chr27	8582024	8585910	3886
Chr27	18882	8947303	8928421	Chr27	8804678	8821056	16378
Chr27	18882	8947303	8928421	Chr27	17411	672506	655095
Chr27	18882	8947303	8928421	Chr27	2613278	2776901	163623
Chr27	18882	8947303	8928421	Chr27	4847908	5131881	283973
Chr27	18882	8947303	8928421	Chr27	5371008	5507871	136863
Chr27	18882	8947303	8928421	Chr27	5522189	5698958	176769
Chr27	18882	8947303	8928421	Chr27	5703527	5923593	220066
Chr27	18882	8947303	8928421	Chr27	7511904	8008736	496832
Chr27	18882	8947303	8928421	Chr27	8094129	8129658	35529
Chr27	18882	8947303	8928421	Chr27	8438245	8575510	137265
Chr27	18882	8947303	8928421	Chr27	8594980	8803017	208037
Chr27	18882	8947303	8928421	Chr27	717246	1740962	1023716
Chr27	18882	8947303	8928421	Chr27	1776584	2610787	834203
Chr27	18882	8947303	8928421	Chr27	2778676	4810400	2031724
Chr27	18882	8947303	8928421	Chr27	5215587	5345912	130325
Chr27	18882	8947303	8928421	Chr27	5974922	7444382	1469460
Chr27	18882	8947303	8928421	Chr27	8311449	8427065	115616
Chr27	14739471	14751282	11811	Chr27	14747230	14790451	43221
Chr27	14785524	14802367	16843	Chr27	14747230	14790451	43221
Chr27	15021245	15075789	54544	Chr27	15032994	15049728	16734
Chr27	15180436	15182095	1659	Chr27	15181145	15229730	48585
Chr27	15183734	15185398	1664	Chr27	15181145	15229730	48585
Chr27	15187037	15188699	1662	Chr27	15181145	15229730	48585
Chr27	15190338	15192000	1662	Chr27	15181145	15229730	48585
Chr27	15193633	15195302	1669	Chr27	15181145	15229730	48585
Chr27	15196935	15198594	1659	Chr27	15181145	15229730	48585
Chr27	15200233	15201892	1659	Chr27	15181145	15229730	48585
Chr27	15203531	15205203	1672	Chr27	15181145	15229730	48585
Chr27	15206836	15208495	1659	Chr27	15181145	15229730	48585
Chr27	15210134	15211798	1664	Chr27	15181145	15229730	48585
Chr27	15213431	15215090	1659	Chr27	15181145	15229730	48585
Chr27	15216729	15218395	1666	Chr27	15181145	15229730	48585
Chr27	15220034	15221694	1660	Chr27	15181145	15229730	48585
Chr27	15223333	15224993	1660	Chr27	15181145	15229730	48585
Chr27	15226632	15228298	1666	Chr27	15181145	15229730	48585
Chr27	15506813	15508457	1644	Chr27	15502471	15594488	92017
Chr27	15542851	15544526	1675	Chr27	15502471	15594488	92017
Chr27	15548652	15550308	1656	Chr27	15502471	15594488	92017
Chr27	15944397	15946043	1646	Chr27	15945089	15978496	33407
Chr27	15947668	15949314	1646	Chr27	15945089	15978496	33407
Chr27	15950939	15952587	1648	Chr27	15945089	15978496	33407
Chr27	16011680	16013353	1673	Chr27	15998492	16013400	14908
Chr27	16115502	16147136	31634	Chr27	16111981	16164911	52930
Chr27	16201834	16203490	1656	Chr27	16189263	16244843	55580
Chr27	16654248	16655905	1657	Chr27	16641691	16738063	96372
Chr28	17971	9501056	9483085	Chr28	4216614	4234030	17416
Chr28	17971	9501056	9483085	Chr28	4238464	4288466	50002
Chr28	17971	9501056	9483085	Chr28	1805691	1983546	177855
Chr28	17971	9501056	9483085	Chr28	2105673	2992028	886355
Chr28	17971	9501056	9483085	Chr28	5937557	6226843	289286
Chr28	17971	9501056	9483085	Chr28	0	1794355	1794355
Chr28	17971	9501056	9483085	Chr28	1987272	2103543	116271
Chr28	17971	9501056	9483085	Chr28	3000179	4139074	1138895
Chr28	17971	9501056	9483085	Chr28	4142187	4213300	71113
Chr28	17971	9501056	9483085	Chr28	4295616	5929914	1634298
Chr28	17971	9501056	9483085	Chr28	6234591	9738139	3503548
Chr28	9852992	13062098	3209106	Chr28	12060742	12062249	1507
Chr28	9852992	13062098	3209106	Chr28	12324749	12328849	4100
Chr28	9852992	13062098	3209106	Chr28	12329874	12332082	2208
Chr28	9852992	13062098	3209106	Chr28	12073387	12082154	8767
Chr28	9852992	13062098	3209106	Chr28	12087801	12136178	48377
Chr28	9852992	13062098	3209106	Chr28	12139137	12161064	21927
Chr28	9852992	13062098	3209106	Chr28	12162557	12186266	23709
Chr28	9852992	13062098	3209106	Chr28	12258138	12320264	62126
Chr28	9852992	13062098	3209106	Chr28	12896767	12968271	71504
Chr28	9852992	13062098	3209106	Chr28	12977737	13005128	27391
Chr28	9852992	13062098	3209106	Chr28	13035658	13045096	9438
Chr28	9852992	13062098	3209106	Chr28	9851549	10096896	245347
Chr28	9852992	13062098	3209106	Chr28	10108674	10471049	362375
Chr28	9852992	13062098	3209106	Chr28	10519799	10681228	161429
Chr28	9852992	13062098	3209106	Chr28	12187445	12254367	66922
Chr28	9852992	13062098	3209106	Chr28	10485585	10505676	20091
Chr28	9852992	13062098	3209106	Chr28	10699525	12056046	1356521
Chr28	9852992	13062098	3209106	Chr28	12333827	12891830	558003
Chr28	13142527	13388274	245747	Chr28	13140316	13185896	45580
Chr28	13142527	13388274	245747	Chr28	13294445	13335157	40712
Chr28	13142527	13388274	245747	Chr28	13227286	13271457	44171
Chr28	13142527	13388274	245747	Chr28	13347104	13378784	31680
Chr28	15972316	15983100	10784	Chr28	15974904	15975269	365
Chr28	16177782	16287407	109625	Chr28	16199285	16292722	93437
Chr28	59215820	59319689	103869	Chr28	59256737	59277451	20714
Chr28	59215820	59319689	103869	Chr28	59302596	59335283	32687
Chr29	20435	402486	382051	Chr29	0	924807	924807
Chr29	402499	413677	11178	Chr29	0	924807	924807
Chr29	416215	690109	273894	Chr29	0	924807	924807
Chr29	715296	2942748	2227452	Chr29	941335	990241	48906
Chr29	715296	2942748	2227452	Chr29	0	924807	924807
Chr29	715296	2942748	2227452	Chr29	1003617	1812478	808861
Chr29	715296	2942748	2227452	Chr29	1849498	4330452	2480954
Chr29	4417456	4448203	30747	Chr29	4424429	4428106	3677
Chr29	9723861	9740083	16222	Chr29	9723862	9726551	2689
Chr29	9831846	10052097	220251	Chr29	9867225	9874042	6817
Chr29	9831846	10052097	220251	Chr29	9874469	9874591	122
Chr29	9831846	10052097	220251	Chr29	9895496	9897377	1881
Chr29	9831846	10052097	220251	Chr29	10049125	10067436	18311
Chr29	10055538	10071812	16274	Chr29	10049125	10067436	18311
Chr29	10132044	10250828	118784	Chr29	10217730	10222898	5168
Chr29	10274022	10413829	139807	Chr29	10280660	10525981	245321
Chr29	10428519	10437283	8764	Chr29	10280660	10525981	245321
Chr29	10448154	10665784	217630	Chr29	10527933	10657020	129087
Chr29	10448154	10665784	217630	Chr29	10280660	10525981	245321
Chr29	13380394	13502209	121815	Chr29	13408897	13474086	65189
Chr29	32657312	32683322	26010	Chr29	32675940	32687611	11671
Chr29	56025432	56169275	143843	Chr29	56109940	56156542	46602
Chr29	56288844	56400158	111314	Chr29	56299661	56301791	2130
Chr29	56288844	56400158	111314	Chr29	56323810	56358291	34481
Chr29	56288844	56400158	111314	Chr29	56374556	56377514	2958
Chr29	56288844	56400158	111314	Chr29	56399479	56412121	12642
ChrX	166725	280061	113336	ChrX	174309	175700	1391
ChrX	166725	280061	113336	ChrX	212251	226882	14631
ChrX	4348340	4465454	117114	ChrX	4348302	4348840	538
ChrX	5188378	5489455	301077	ChrX	5202270	5240541	38271
ChrX	5188378	5489455	301077	ChrX	5427519	5482262	54743
ChrX	10673374	10742791	69417	ChrX	10673099	10715081	41982
ChrX	16603720	16658578	54858	ChrX	16534952	16646833	111881
ChrX	17029845	17050766	20921	ChrX	16961457	17048604	87147
ChrX	20059995	20242214	182219	ChrX	20074504	20218782	144278
ChrX	20295751	20336260	40509	ChrX	20319269	20355751	36482
ChrX	20353300	20356683	3383	ChrX	20319269	20355751	36482
ChrX	20363197	20367574	4377	ChrX	20366627	20404181	37554
ChrX	20367575	20409659	42084	ChrX	20366627	20404181	37554
ChrX	20537796	20656683	118887	ChrX	20544418	20650565	106147
ChrX	29732724	29777189	44465	ChrX	29745286	29758265	12979
ChrX	29908960	30339637	430677	ChrX	29911568	30330647	419079
ChrX	30339678	30464570	124892	ChrX	30383788	30384904	1116
ChrX	30885417	31187518	302101	ChrX	30918862	31184191	265329
ChrX	34818166	34880946	62780	ChrX	34858092	34912649	54557
ChrX	34910221	34944255	34034	ChrX	34858092	34912649	54557
ChrX	34948977	34959494	10517	ChrX	34954170	34997629	43459
ChrX	34982641	35006818	24177	ChrX	34954170	34997629	43459
ChrX	35027770	35076831	49061	ChrX	35029142	35096934	67792
ChrX	38180184	38264178	83994	ChrX	38094169	38349213	255044
ChrX	38275601	38360128	84527	ChrX	38094169	38349213	255044
ChrX	38275601	38360128	84527	ChrX	38360036	38428555	68519
ChrX	38376459	38470330	93871	ChrX	38360036	38428555	68519
ChrX	38376459	38470330	93871	ChrX	38445155	38580495	135340
ChrX	38675816	38755794	79978	ChrX	38606665	38694168	87503
ChrX	38675816	38755794	79978	ChrX	38700413	38848875	148462
ChrX	38757229	38856314	99085	ChrX	38850946	38926120	75174
ChrX	38757229	38856314	99085	ChrX	38700413	38848875	148462
ChrX	39097232	39136265	39033	ChrX	39079561	39178958	99397
ChrX	39153627	39235873	82246	ChrX	39183201	39183783	582
ChrX	39153627	39235873	82246	ChrX	39079561	39178958	99397
ChrX	39153627	39235873	82246	ChrX	39184989	39278972	93983
ChrX	39248368	39334682	86314	ChrX	39297769	39308460	10691
ChrX	39248368	39334682	86314	ChrX	39328899	39385620	56721
ChrX	39248368	39334682	86314	ChrX	39184989	39278972	93983
ChrX	39645185	39647512	2327	ChrX	39621334	39646615	25281
ChrX	39702470	39746826	44356	ChrX	39734875	39737740	2865
ChrX	39702470	39746826	44356	ChrX	39689061	39712379	23318
ChrX	39702470	39746826	44356	ChrX	39745022	39751259	6237
ChrX	39752442	39913611	161169	ChrX	39762102	39826250	64148
ChrX	39752442	39913611	161169	ChrX	39844449	39913941	69492
ChrX	40138411	40243909	105498	ChrX	39917621	40366927	449306
ChrX	40255320	40457380	202060	ChrX	40370546	40378359	7813
ChrX	40255320	40457380	202060	ChrX	39917621	40366927	449306
ChrX	40255320	40457380	202060	ChrX	40403555	40519334	115779
ChrX	40463496	40507861	44365	ChrX	40403555	40519334	115779
ChrX	40536819	40551507	14688	ChrX	40530775	40738611	207836
ChrX	40568205	40570507	2302	ChrX	40530775	40738611	207836
ChrX	41733768	41972082	238314	ChrX	41836092	41922536	86444
ChrX	41991604	42049545	57941	ChrX	42030321	42030415	94
ChrX	43190669	43295787	105118	ChrX	43232631	43267228	34597
ChrX	43823217	43836764	13547	ChrX	43814710	43856121	41411
ChrX	43851660	43890003	38343	ChrX	43814710	43856121	41411
ChrX	43851660	43890003	38343	ChrX	43858213	43864068	5855
ChrX	44452396	44576292	123896	ChrX	44488400	44546120	57720
ChrX	57911546	57935763	24217	ChrX	57916382	57968713	52331
ChrX	58292450	58302996	10546	ChrX	58297997	58303281	5284
ChrX	58449228	58473017	23789	ChrX	58426152	58564255	138103
ChrX	58473956	58653034	179078	ChrX	58623385	58648855	25470
ChrX	58473956	58653034	179078	ChrX	58650527	58664998	14471
ChrX	58473956	58653034	179078	ChrX	58426152	58564255	138103
ChrX	58653327	58780890	127563	ChrX	58650527	58664998	14471
ChrX	58653327	58780890	127563	ChrX	58755572	58838923	83351
ChrX	58781199	58987874	206675	ChrX	58875031	58877794	2763
ChrX	58781199	58987874	206675	ChrX	58755572	58838923	83351
ChrX	58781199	58987874	206675	ChrX	58932398	58950957	18559
ChrX	59026420	59083888	57468	ChrX	59083631	59085272	1641
ChrX	59026420	59083888	57468	ChrX	59031695	59070627	38932
ChrX	59101940	59228974	127034	ChrX	59166986	59196565	29579
ChrX	59101940	59228974	127034	ChrX	59112141	59142662	30521
ChrX	61513466	61617162	103696	ChrX	61538363	61662778	124415
ChrX	61637915	61795196	157281	ChrX	61663929	61685315	21386
ChrX	61637915	61795196	157281	ChrX	61765830	61770354	4524
ChrX	61637915	61795196	157281	ChrX	61538363	61662778	124415
ChrX	61815946	62025234	209288	ChrX	61822933	61987046	164113
ChrX	62501099	62593795	92696	ChrX	62549913	62619882	69969
ChrX	62606437	62705482	99045	ChrX	62549913	62619882	69969
ChrX	63160963	63224649	63686	ChrX	63183695	63190837	7142
ChrX	63160963	63224649	63686	ChrX	63023778	63170180	146402
ChrX	63239170	63423261	184091	ChrX	63251799	63296804	45005
ChrX	63438687	63625327	186640	ChrX	63442836	63486871	44035
ChrX	63438687	63625327	186640	ChrX	63488265	63627118	138853
ChrX	67692507	67849123	156616	ChrX	67830317	67831644	1327
ChrX	67692507	67849123	156616	ChrX	67808038	67822327	14289
ChrX	67856046	67989991	133945	ChrX	67955495	67980820	25325
ChrX	82789765	83161449	371684	ChrX	83028523	83050174	21651
ChrX	82789765	83161449	371684	ChrX	82804780	83025868	221088
ChrX	88138770	88762437	623667	ChrX	88329946	88336793	6847
ChrX	88138770	88762437	623667	ChrX	88545098	88546729	1631
ChrX	88138770	88762437	623667	ChrX	88560712	88562206	1494
ChrX	88138770	88762437	623667	ChrX	88235621	88300026	64405
ChrX	88138770	88762437	623667	ChrX	88648173	88660288	12115
ChrX	88138770	88762437	623667	ChrX	88673028	88723030	50002
ChrX	88138770	88762437	623667	ChrX	88452152	88493706	41554
ChrX	88138770	88762437	623667	ChrX	88603720	88641025	37305
ChrX	94446736	94551231	104495	ChrX	94479931	94491993	12062
ChrX	94446736	94551231	104495	ChrX	94515924	96030682	1514758
ChrX	97368317	97522764	154447	ChrX	97459588	97501906	42318
ChrX	97630419	98084849	454430	ChrX	97742778	97744564	1786
ChrX	97630419	98084849	454430	ChrX	97832460	97835544	3084
ChrX	97630419	98084849	454430	ChrX	97862964	97869861	6897
ChrX	97630419	98084849	454430	ChrX	97939310	97939857	547
ChrX	97630419	98084849	454430	ChrX	97679097	97710228	31131
ChrX	97630419	98084849	454430	ChrX	97966532	97980716	14184
ChrX	97630419	98084849	454430	ChrX	97996906	98017283	20377
ChrX	97630419	98084849	454430	ChrX	98040496	98071213	30717
ChrX	98178286	98319328	141042	ChrX	98242323	98265865	23542
ChrX	101594008	101666249	72241	ChrX	101590655	101608028	17373
ChrX	101820030	101974022	153992	ChrX	101846555	101867172	20617
ChrX	101820030	101974022	153992	ChrX	101886503	101909550	23047
ChrX	101820030	101974022	153992	ChrX	101960449	101999444	38995
ChrX	102084772	102143875	59103	ChrX	102081564	102095565	14001
ChrX	102084772	102143875	59103	ChrX	102100326	102139860	39534
ChrX	102171671	102176250	4579	ChrX	102174038	102191514	17476
ChrX	102273388	102279183	5795	ChrX	102266530	102288550	22020
ChrX	102333525	102359395	25870	ChrX	102344091	102440877	96786
ChrX	102371558	102402112	30554	ChrX	102344091	102440877	96786
ChrX	102417965	102421929	3964	ChrX	102344091	102440877	96786
ChrX	102437826	102463542	25716	ChrX	102344091	102440877	96786
ChrX	102551202	102553312	2110	ChrX	102540484	102601341	60857
ChrX	102557162	102565899	8737	ChrX	102540484	102601341	60857
ChrX	102631735	102678801	47066	ChrX	102631679	102642973	11294
ChrX	102631735	102678801	47066	ChrX	102650487	102664056	13569
ChrX	102631735	102678801	47066	ChrX	102671521	102702932	31411
ChrX	102691160	102771697	80537	ChrX	102671521	102702932	31411
ChrX	102691160	102771697	80537	ChrX	102716928	102747775	30847
ChrX	102691160	102771697	80537	ChrX	102749731	102813501	63770
ChrX	102877959	102908860	30901	ChrX	102890157	102905296	15139
ChrX	102945609	103007533	61924	ChrX	102931980	102979051	47071
ChrX	103080640	103171533	90893	ChrX	103163375	103180092	16717
ChrX	103185115	103283350	98235	ChrX	103227426	103250462	23036
ChrX	105640063	105725984	85921	ChrX	105657437	105685412	27975
ChrX	105789868	105954145	164277	ChrX	105809767	105865014	55247
ChrX	105789868	105954145	164277	ChrX	105869087	105876940	7853
ChrX	110403133	110669920	266787	ChrX	110441909	110623711	181802
ChrX	127142730	127169734	27004	ChrX	127153041	127188535	35494
ChrX	127171371	127175525	4154	ChrX	127153041	127188535	35494
ChrX	127450019	127625777	175758	ChrX	127472931	127597153	124222
ChrX	131767609	131804410	36801	ChrX	131791888	131806707	14819
ChrX	132103340	132108324	4984	ChrX	132064566	132114581	50015
ChrX	132217614	132286745	69131	ChrX	132266180	132281897	15717
ChrX	132419008	132486614	67606	ChrX	132377587	132487772	110185
ChrX	132491044	132538106	47062	ChrX	132495146	132562809	67663
ChrX	132543614	132564056	20442	ChrX	132495146	132562809	67663
ChrX	135587058	135740172	153114	ChrX	135611735	135648071	36336
ChrX	139225483	139748657	523174	ChrX	139504817	139513595	8778
ChrX	139225483	139748657	523174	ChrX	139246387	139335119	88732
ChrX	139225483	139748657	523174	ChrX	139633033	139733372	100339
ChrX	145481862	145768675	286813	ChrX	145572629	145655793	83164
ChrX	145768796	145882554	113758	ChrX	145768794	145953369	184575
ChrX	145993472	146025076	31604	ChrX	145979334	146025269	45935
ChrX	146216516	146321423	104907	ChrX	146163010	146256050	93040
ChrX	146216516	146321423	104907	ChrX	146292673	146308364	15691
ChrX	146465963	146524592	58629	ChrX	146483934	146486530	2596
ChrX	146542970	146552403	9433	ChrX	146542953	146552559	9606
ChrX	146552559	146979009	426450	ChrX	146562127	146663079	100952
ChrX	146552559	146979009	426450	ChrX	146670692	146698585	27893
ChrX	146552559	146979009	426450	ChrX	146705554	146914917	209363
ChrX	147008504	147136435	127931	ChrX	147065746	147119828	54082
ChrX	147136504	147297679	161175	ChrX	147206965	147206966	1
ChrX	147297835	147521206	223371	ChrX	147297925	147544599	246674
ChrX	147540953	147699215	158262	ChrX	147603590	147688088	84498
ChrX	147540953	147699215	158262	ChrX	147297925	147544599	246674
ChrX	149983292	150103722	120430	ChrX	150013840	150039089	25249
ChrX	150254630	150346825	92195	ChrX	150305994	150333153	27159
ChrX	150474260	150544735	70475	ChrX	150508215	150532628	24413
ChrX	154426087	154510443	84356	ChrX	154344494	154613901	269407
ChrX	156263121	156294054	30933	ChrX	156126974	156267231	140257
ChrX	157107991	157117527	9536	ChrX	156998266	157168361	170095

## Sheet: Table S9
Supplementary Table 9. The duplication of annotated genes in SDs of PURs
Chromosome	Start	End	Gene ID	Location	Annotation from ARS-UCD2.0	Description
Chr03	14141591	14160837	T2T-cattle1.0-SAAS_Chr03g00002	pur	gene-LOC112447010	Coiled-coil domain-containing protein 3 OS=Mus musculus OX=10090 GN=Ccdc3 PE=1 SV=1
Chr03	134098839	134099789	T2T-cattle1.0-SAAS_Chr03g01224	pur	gene-OR9S39	Olfactory receptor 12 OS=Mus musculus OX=10090 GN=Olfr12 PE=3 SV=2
Chr03	134134104	134135054	T2T-cattle1.0-SAAS_Chr03g01225	non-pur	gene-OR9S39	Olfactory receptor 12 OS=Mus musculus OX=10090 GN=Olfr12 PE=3 SV=2
Chr03	135515614	135519092	T2T-cattle1.0-SAAS_Chr03g01262	non-pur	gene-LOC112446467	Ubiquitin carboxyl-terminal hydrolase 17-like protein 11 OS=Homo sapiens OX=9606 GN=USP17L11 PE=3 SV=1
Chr03	135698075	135701511	T2T-cattle1.0-SAAS_Chr03g01263	pur	gene-LOC112446467	Ubiquitin carboxyl-terminal hydrolase 17-like protein 18 OS=Homo sapiens OX=9606 GN=USP17L18 PE=3 SV=1
Chr03	135702691	135706118	T2T-cattle1.0-SAAS_Chr03g01264	pur	gene-LOC112446467	Ubiquitin carboxyl-terminal hydrolase 17-like protein 18 OS=Homo sapiens OX=9606 GN=USP17L18 PE=3 SV=1
Chr03	135707294	135710721	T2T-cattle1.0-SAAS_Chr03g01265	pur	gene-LOC112446467	Ubiquitin carboxyl-terminal hydrolase 17-like protein 18 OS=Homo sapiens OX=9606 GN=USP17L18 PE=3 SV=1
Chr03	135711896	135715323	T2T-cattle1.0-SAAS_Chr03g01266	pur	gene-LOC112446467	Ubiquitin carboxyl-terminal hydrolase 17-like protein 18 OS=Homo sapiens OX=9606 GN=USP17L18 PE=3 SV=1
Chr03	135716503	135719930	T2T-cattle1.0-SAAS_Chr03g01267	pur	gene-LOC112446467	Ubiquitin carboxyl-terminal hydrolase 17-like protein 18 OS=Homo sapiens OX=9606 GN=USP17L18 PE=3 SV=1
Chr03	135721103	135724539	T2T-cattle1.0-SAAS_Chr03g01268	pur	gene-LOC112446467	Ubiquitin carboxyl-terminal hydrolase 17-like protein 18 OS=Homo sapiens OX=9606 GN=USP17L18 PE=3 SV=1
Chr03	135725716	135729143	T2T-cattle1.0-SAAS_Chr03g01269	pur	gene-LOC112446467	Ubiquitin carboxyl-terminal hydrolase 17-like protein 18 OS=Homo sapiens OX=9606 GN=USP17L18 PE=3 SV=1
Chr03	135730320	135733747	T2T-cattle1.0-SAAS_Chr03g01270	pur	gene-LOC112446467	Ubiquitin carboxyl-terminal hydrolase 17-like protein 18 OS=Homo sapiens OX=9606 GN=USP17L18 PE=3 SV=1
Chr03	135734919	135738355	T2T-cattle1.0-SAAS_Chr03g01271	pur	gene-LOC112446467	Ubiquitin carboxyl-terminal hydrolase 17-like protein 18 OS=Homo sapiens OX=9606 GN=USP17L18 PE=3 SV=1
Chr03	135739529	135742965	T2T-cattle1.0-SAAS_Chr03g01272	pur	gene-LOC112446467	Ubiquitin carboxyl-terminal hydrolase 17-like protein 18 OS=Homo sapiens OX=9606 GN=USP17L18 PE=3 SV=1
Chr03	135744144	135747580	T2T-cattle1.0-SAAS_Chr03g01273	pur	gene-LOC112446467	Ubiquitin carboxyl-terminal hydrolase 17-like protein 18 OS=Homo sapiens OX=9606 GN=USP17L18 PE=3 SV=1
Chr03	135748759	135752186	T2T-cattle1.0-SAAS_Chr03g01274	pur	gene-LOC112446467	Ubiquitin carboxyl-terminal hydrolase 17-like protein 18 OS=Homo sapiens OX=9606 GN=USP17L18 PE=3 SV=1
Chr03	135753365	135756792	T2T-cattle1.0-SAAS_Chr03g01275	pur	gene-LOC112446467	Ubiquitin carboxyl-terminal hydrolase 17-like protein 18 OS=Homo sapiens OX=9606 GN=USP17L18 PE=3 SV=1
Chr03	135757963	135761388	T2T-cattle1.0-SAAS_Chr03g01276	pur	gene-LOC112446467	Ubiquitin carboxyl-terminal hydrolase 17-like protein 18 OS=Homo sapiens OX=9606 GN=USP17L18 PE=3 SV=1
Chr03	135762572	135765999	T2T-cattle1.0-SAAS_Chr03g01277	pur	gene-LOC112446467	Ubiquitin carboxyl-terminal hydrolase 17-like protein 18 OS=Homo sapiens OX=9606 GN=USP17L18 PE=3 SV=1
Chr03	135767178	135770605	T2T-cattle1.0-SAAS_Chr03g01278	pur	gene-LOC112446467	Ubiquitin carboxyl-terminal hydrolase 17-like protein 18 OS=Homo sapiens OX=9606 GN=USP17L18 PE=3 SV=1
Chr04	110645121	110648588	T2T-cattle1.0-SAAS_Chr04g00564	non-pur	gene-LOC615948	T cell receptor beta variable 9 OS=Homo sapiens OX=9606 GN=TRBV9 PE=3 SV=1
Chr04	110743698	110747176	T2T-cattle1.0-SAAS_Chr04g00568	pur	gene-LOC615948	T cell receptor beta variable 9 OS=Homo sapiens OX=9606 GN=TRBV9 PE=3 SV=1
Chr04	110944050	110944610	T2T-cattle1.0-SAAS_Chr04g00572	non-pur	gene-LOC100336982	T cell receptor beta variable 19 OS=Homo sapiens OX=9606 GN=TRBV19 PE=1 SV=2
Chr04	110976978	110977537	T2T-cattle1.0-SAAS_Chr04g00573	non-pur	gene-LOC100336982	T cell receptor beta variable 19 OS=Homo sapiens OX=9606 GN=TRBV19 PE=1 SV=2
Chr04	111010399	111010959	T2T-cattle1.0-SAAS_Chr04g00574	non-pur	gene-LOC100336982	T cell receptor beta variable 19 OS=Homo sapiens OX=9606 GN=TRBV19 PE=1 SV=2
Chr04	111074725	111075285	T2T-cattle1.0-SAAS_Chr04g00575	pur	gene-LOC100336982	T cell receptor beta variable 19 OS=Homo sapiens OX=9606 GN=TRBV19 PE=1 SV=2
Chr04	118085310	118094214	T2T-cattle1.0-SAAS_Chr04g00655	non-pur	gene-LOC614871	GTPase IMAP family member 7 OS=Homo sapiens OX=9606 GN=GIMAP7 PE=1 SV=1
Chr04	119807783	119816649	T2T-cattle1.0-SAAS_Chr04g00671	non-pur	gene-LOC614871	GTPase IMAP family member 7 OS=Homo sapiens OX=9606 GN=GIMAP7 PE=1 SV=1
Chr05	79087786	79088730	T2T-cattle1.0-SAAS_Chr05g00544	non-pur	gene-OR6C7	Olfactory receptor 6C3 OS=Homo sapiens OX=9606 GN=OR6C3 PE=3 SV=2
Chr05	79104257	79105192	T2T-cattle1.0-SAAS_Chr05g00545	non-pur	gene-OR6C3	Olfactory receptor 6C3 OS=Homo sapiens OX=9606 GN=OR6C3 PE=3 SV=2
Chr05	79125061	79125996	T2T-cattle1.0-SAAS_Chr05g00547	non-pur	gene-OR6C3	Olfactory receptor 6C3 OS=Homo sapiens OX=9606 GN=OR6C3 PE=3 SV=2
Chr05	79140651	79141595	T2T-cattle1.0-SAAS_Chr05g00548	non-pur	gene-OR6C7	Olfactory receptor 6C3 OS=Homo sapiens OX=9606 GN=OR6C3 PE=3 SV=2
Chr06	21624647	21627881	T2T-cattle1.0-SAAS_Chr06g00035	non-pur	gene-FABP2	Fatty acid-binding protein, intestinal OS=Bos taurus OX=9913 GN=FABP2 PE=2 SV=3
Chr07	24641831	24642926	T2T-cattle1.0-SAAS_Chr07g00234	pur	gene-OR7A126	Olfactory receptor 7A17 OS=Homo sapiens OX=9606 GN=OR7A17 PE=2 SV=1
Chr08	34981674	34982860	T2T-cattle1.0-SAAS_Chr08g00105	non-pur	gene-LOC112445660	Interferon tau-1 OS=Bos taurus OX=9913 GN=IFNT1 PE=2 SV=2
Chr08	35006812	35007872	T2T-cattle1.0-SAAS_Chr08g00106	pur	gene-IFNT3	Interferon tau-1 OS=Bos taurus OX=9913 GN=IFNT1 PE=2 SV=2
Chr08	35031911	35032971	T2T-cattle1.0-SAAS_Chr08g00107	pur	gene-IFNT3	Interferon tau-1 OS=Bos taurus OX=9913 GN=IFNT1 PE=2 SV=2
Chr08	35057020	35058080	T2T-cattle1.0-SAAS_Chr08g00108	pur	gene-IFNT3	Interferon tau-1 OS=Bos taurus OX=9913 GN=IFNT1 PE=2 SV=2
Chr08	35082400	35083583	T2T-cattle1.0-SAAS_Chr08g00109	non-pur	gene-LOC112445660	Interferon tau-1 OS=Bos taurus OX=9913 GN=IFNT1 PE=2 SV=2
Chr08	35705747	35708140	T2T-cattle1.0-SAAS_Chr08g00150	non-pur	gene-LOC107132683	Interferon omega-1 OS=Bos taurus OX=9913 GN=IFNW1 PE=3 SV=1
Chr08	35716630	35718211	T2T-cattle1.0-SAAS_Chr08g00152	non-pur	gene-LOC112441471	Interferon beta-1 OS=Bos taurus OX=9913 GN=IFNB1 PE=3 SV=1
Chr08	35772243	35773826	T2T-cattle1.0-SAAS_Chr08g00154	pur	gene-LOC112441471	Interferon beta-1 OS=Bos taurus OX=9913 GN=IFNB1 PE=3 SV=1
Chr08	35789133	35791526	T2T-cattle1.0-SAAS_Chr08g00155	non-pur	gene-LOC107132683	Interferon omega-1 OS=Bos taurus OX=9913 GN=IFNW1 PE=3 SV=1
Chr08	83029792	83032342	T2T-cattle1.0-SAAS_Chr08g00439	pur	gene-LOC112445399	Liprin-alpha-2 OS=Mus musculus OX=10090 GN=Ppfia2 PE=1 SV=2
Chr08	83665052	83667697	T2T-cattle1.0-SAAS_Chr08g00452	pur	gene-LOC112445399	Liprin-alpha-2 OS=Mus musculus OX=10090 GN=Ppfia2 PE=1 SV=2
Chr09	16832207	16832688	T2T-cattle1.0-SAAS_Chr09g00002	non-pur	gene-LOC132344729	Histone H4 OS=Xenopus tropicalis OX=8364 GN=TGas006m08.1 PE=3 SV=1
Chr09	16839692	16840161	T2T-cattle1.0-SAAS_Chr09g00003	pur	gene-LOC112445649	Histone H4 OS=Xenopus tropicalis OX=8364 GN=TGas006m08.1 PE=3 SV=1
Chr09	16847153	16847634	T2T-cattle1.0-SAAS_Chr09g00004	pur	gene-LOC132344729	Histone H4 OS=Xenopus tropicalis OX=8364 GN=TGas006m08.1 PE=3 SV=1
Chr09	16854638	16855107	T2T-cattle1.0-SAAS_Chr09g00005	non-pur	gene-LOC112445649	Histone H4 OS=Xenopus tropicalis OX=8364 GN=TGas006m08.1 PE=3 SV=1
Chr09	16862111	16862580	T2T-cattle1.0-SAAS_Chr09g00006	non-pur	gene-LOC112445649	Histone H4 OS=Xenopus tropicalis OX=8364 GN=TGas006m08.1 PE=3 SV=1
Chr09	16884530	16884999	T2T-cattle1.0-SAAS_Chr09g00009	non-pur	gene-LOC112445649	Histone H4 OS=Xenopus tropicalis OX=8364 GN=TGas006m08.1 PE=3 SV=1
Chr09	16899464	16899945	T2T-cattle1.0-SAAS_Chr09g00011	pur	gene-LOC132344729	Histone H4 OS=Xenopus tropicalis OX=8364 GN=TGas006m08.1 PE=3 SV=1
Chr09	16906949	16907418	T2T-cattle1.0-SAAS_Chr09g00012	pur	gene-LOC112445649	Histone H4 OS=Xenopus tropicalis OX=8364 GN=TGas006m08.1 PE=3 SV=1
Chr09	16914422	16914891	T2T-cattle1.0-SAAS_Chr09g00013	pur	gene-LOC112445649	Histone H4 OS=Xenopus tropicalis OX=8364 GN=TGas006m08.1 PE=3 SV=1
Chr09	16921895	16922364	T2T-cattle1.0-SAAS_Chr09g00014	pur	gene-LOC112445649	Histone H4 OS=Xenopus tropicalis OX=8364 GN=TGas006m08.1 PE=3 SV=1
Chr09	16929356	16929837	T2T-cattle1.0-SAAS_Chr09g00015	pur	gene-LOC132344729	Histone H4 OS=Xenopus tropicalis OX=8364 GN=TGas006m08.1 PE=3 SV=1
Chr09	16936841	16937310	T2T-cattle1.0-SAAS_Chr09g00016	non-pur	gene-LOC112445649	Histone H4 OS=Xenopus tropicalis OX=8364 GN=TGas006m08.1 PE=3 SV=1
Chr09	16944302	16944783	T2T-cattle1.0-SAAS_Chr09g00017	non-pur	gene-LOC132344729	Histone H4 OS=Xenopus tropicalis OX=8364 GN=TGas006m08.1 PE=3 SV=1
Chr09	16951786	16952255	T2T-cattle1.0-SAAS_Chr09g00018	non-pur	gene-LOC112445649	Histone H4 OS=Xenopus tropicalis OX=8364 GN=TGas006m08.1 PE=3 SV=1
Chr09	16959259	16959728	T2T-cattle1.0-SAAS_Chr09g00019	non-pur	gene-LOC112445649	Histone H4 OS=Xenopus tropicalis OX=8364 GN=TGas006m08.1 PE=3 SV=1
Chr09	16963912	16964393	T2T-cattle1.0-SAAS_Chr09g00020	non-pur	gene-LOC132344729	Histone H4 OS=Xenopus tropicalis OX=8364 GN=TGas006m08.1 PE=3 SV=1
Chr09	16972789	16973270	T2T-cattle1.0-SAAS_Chr09g00021	non-pur	gene-LOC132344729	Histone H4 OS=Xenopus tropicalis OX=8364 GN=TGas006m08.1 PE=3 SV=1
Chr09	16980261	16980742	T2T-cattle1.0-SAAS_Chr09g00022	non-pur	gene-LOC132344729	Histone H4 OS=Xenopus tropicalis OX=8364 GN=TGas006m08.1 PE=3 SV=1
Chr09	16987745	16988214	T2T-cattle1.0-SAAS_Chr09g00023	non-pur	gene-LOC112445649	Histone H4 OS=Xenopus tropicalis OX=8364 GN=TGas006m08.1 PE=3 SV=1
Chr10	36269078	36270022	T2T-cattle1.0-SAAS_Chr10g00330	pur	gene-OR11G9	Olfactory receptor 11H6 OS=Homo sapiens OX=9606 GN=OR11H6 PE=3 SV=1
Chr11	109287966	109320522	T2T-cattle1.0-SAAS_Chr11g00789	non-pur	gene-KYAT1	Kynurenine--oxoglutarate transaminase 1 OS=Homo sapiens OX=9606 GN=KYAT1 PE=1 SV=1
Chr11	109360940	109389822	T2T-cattle1.0-SAAS_Chr11g00790	non-pur	gene-KYAT1	Kynurenine--oxoglutarate transaminase 1 OS=Homo sapiens OX=9606 GN=KYAT1 PE=1 SV=1
Chr11	117271779	117275227	T2T-cattle1.0-SAAS_Chr11g00976	pur	gene-LOC112446467	Ubiquitin carboxyl-terminal hydrolase 17-like protein 22 OS=Homo sapiens OX=9606 GN=USP17L22 PE=3 SV=1
Chr13	68241566	68252105	T2T-cattle1.0-SAAS_Chr13g00535	non-pur	gene-BPIFA2A	Short palate, lung and nasal epithelium carcinoma-associated protein 2A OS=Bos taurus OX=9913 GN=SPLUNC2A PE=2 SV=2
Chr13	68273111	68283653	T2T-cattle1.0-SAAS_Chr13g00536	non-pur	gene-BPIFA2A	Short palate, lung and nasal epithelium carcinoma-associated protein 2A OS=Bos taurus OX=9913 GN=SPLUNC2A PE=2 SV=2
Chr13	68336220	68346761	T2T-cattle1.0-SAAS_Chr13g00538	non-pur	gene-BPIFA2A	Short palate, lung and nasal epithelium carcinoma-associated protein 2A OS=Bos taurus OX=9913 GN=SPLUNC2A PE=2 SV=2
Chr14	8418027	8430352	T2T-cattle1.0-SAAS_Chr14g00004	pur	gene-LOC100299144	Liprin-alpha-1 OS=Homo sapiens OX=9606 GN=PPFIA1 PE=1 SV=1
Chr14	8590947	8632603	T2T-cattle1.0-SAAS_Chr14g00007	pur	gene-LOC101906171	Liprin-alpha-1 OS=Homo sapiens OX=9606 GN=PPFIA1 PE=1 SV=1
Chr14	8780148	8821780	T2T-cattle1.0-SAAS_Chr14g00009	pur	gene-LOC101906171	Liprin-alpha-1 OS=Homo sapiens OX=9606 GN=PPFIA1 PE=1 SV=1
Chr14	9117378	9150443	T2T-cattle1.0-SAAS_Chr14g00010	pur	gene-LOC101906171	Liprin-alpha-1 OS=Homo sapiens OX=9606 GN=PPFIA1 PE=1 SV=1
Chr14	9270213	9282549	T2T-cattle1.0-SAAS_Chr14g00012	pur	gene-LOC100299144	Liprin-alpha-1 OS=Homo sapiens OX=9606 GN=PPFIA1 PE=1 SV=1
Chr14	9333635	9338449	T2T-cattle1.0-SAAS_Chr14g00013	pur	gene-LOC112445429	Liprin-alpha-1 OS=Homo sapiens OX=9606 GN=PPFIA1 PE=1 SV=1
Chr14	9639239	9672307	T2T-cattle1.0-SAAS_Chr14g00014	pur	gene-LOC101906171	Liprin-alpha-1 OS=Homo sapiens OX=9606 GN=PPFIA1 PE=1 SV=1
Chr14	10000823	10033906	T2T-cattle1.0-SAAS_Chr14g00015	pur	gene-LOC101906171	Liprin-alpha-1 OS=Homo sapiens OX=9606 GN=PPFIA1 PE=1 SV=1
Chr14	10051345	10063686	T2T-cattle1.0-SAAS_Chr14g00017	pur	gene-LOC100299144	Liprin-alpha-1 OS=Homo sapiens OX=9606 GN=PPFIA1 PE=1 SV=1
Chr14	10114647	10119461	T2T-cattle1.0-SAAS_Chr14g00018	pur	gene-LOC112445429	Liprin-alpha-1 OS=Homo sapiens OX=9606 GN=PPFIA1 PE=1 SV=1
Chr14	10236233	10269314	T2T-cattle1.0-SAAS_Chr14g00019	pur	gene-LOC101906171	Liprin-alpha-1 OS=Homo sapiens OX=9606 GN=PPFIA1 PE=1 SV=1
Chr14	10336891	10369979	T2T-cattle1.0-SAAS_Chr14g00021	pur	gene-LOC101906171	Liprin-alpha-1 OS=Homo sapiens OX=9606 GN=PPFIA1 PE=1 SV=1
Chr14	10387408	10399746	T2T-cattle1.0-SAAS_Chr14g00023	pur	gene-LOC100299144	Liprin-alpha-1 OS=Homo sapiens OX=9606 GN=PPFIA1 PE=1 SV=1
Chr14	10450678	10455491	T2T-cattle1.0-SAAS_Chr14g00024	pur	gene-LOC112445429	Liprin-alpha-1 OS=Homo sapiens OX=9606 GN=PPFIA1 PE=1 SV=1
Chr15	53652581	53653558	T2T-cattle1.0-SAAS_Chr15g00353	pur	gene-OR6A2	Olfactory receptor 226 OS=Rattus norvegicus OX=10116 GN=Olr226 PE=2 SV=2
Chr15	53831044	53831976	T2T-cattle1.0-SAAS_Chr15g00355	pur	gene-OR2AG2	Olfactory receptor 2AG2 OS=Homo sapiens OX=9606 GN=OR2AG2 PE=2 SV=1
Chr15	53866025	53866957	T2T-cattle1.0-SAAS_Chr15g00357	pur	gene-OR2AG1E	Olfactory receptor 2AG1 OS=Homo sapiens OX=9606 GN=OR2AG1 PE=1 SV=2
Chr15	53961955	53962887	T2T-cattle1.0-SAAS_Chr15g00359	non-pur	gene-OR2AG1E	Olfactory receptor 2AG1 OS=Homo sapiens OX=9606 GN=OR2AG1 PE=1 SV=2
Chr15	54010081	54011013	T2T-cattle1.0-SAAS_Chr15g00361	non-pur	gene-OR2AG2	Olfactory receptor 2AG2 OS=Homo sapiens OX=9606 GN=OR2AG2 PE=2 SV=1
Chr15	56823633	56824574	T2T-cattle1.0-SAAS_Chr15g00477	pur	gene-OR51A5	Olfactory receptor 51A7 OS=Homo sapiens OX=9606 GN=OR51A7 PE=2 SV=1
Chr15	86954489	86955448	T2T-cattle1.0-SAAS_Chr15g00849	non-pur	gene-OR8K1	Olfactory receptor 8K1 OS=Homo sapiens OX=9606 GN=OR8K1 PE=2 SV=1
Chr15	86972671	86973597	T2T-cattle1.0-SAAS_Chr15g00850	non-pur	gene-OR8J19	Olfactory receptor 8J3 OS=Homo sapiens OX=9606 GN=OR8J3 PE=3 SV=1
Chr15	86977501	86978433	T2T-cattle1.0-SAAS_Chr15g00851	non-pur	gene-OR8J16	Olfactory receptor 8J3 OS=Homo sapiens OX=9606 GN=OR8J3 PE=3 SV=1
Chr15	86984866	86985813	T2T-cattle1.0-SAAS_Chr15g00852	non-pur	gene-OR8J3F	Olfactory receptor 8J3 OS=Homo sapiens OX=9606 GN=OR8J3 PE=3 SV=1
Chr15	87044612	87045562	T2T-cattle1.0-SAAS_Chr15g00854	non-pur	gene-OR5AL8	Olfactory receptor 5AL1 OS=Homo sapiens OX=9606 GN=OR5AL1 PE=3 SV=1
Chr15	87073006	87074090	T2T-cattle1.0-SAAS_Chr15g00856	non-pur	gene-OR8K62	Olfactory receptor 8K3 OS=Homo sapiens OX=9606 GN=OR8K3 PE=3 SV=1
Chr15	87165432	87166352	T2T-cattle1.0-SAAS_Chr15g00858	non-pur	gene-OR5T2	Olfactory receptor 5T2 OS=Homo sapiens OX=9606 GN=OR5T2 PE=2 SV=3
Chr15	87207421	87208359	T2T-cattle1.0-SAAS_Chr15g00859	non-pur	gene-OR9G4	Olfactory receptor 9G4 OS=Homo sapiens OX=9606 GN=OR9G4 PE=3 SV=2
Chr15	87222565	87223495	T2T-cattle1.0-SAAS_Chr15g00860	non-pur	gene-OR9G10C	Olfactory receptor 1013 OS=Mus musculus OX=10090 GN=Olfr1013 PE=3 SV=1
Chr15	87263329	87264213	T2T-cattle1.0-SAAS_Chr15g00861	non-pur	gene-OR8K63	Olfactory receptor 8K3 OS=Homo sapiens OX=9606 GN=OR8K3 PE=3 SV=1
Chr15	87277698	87278639	T2T-cattle1.0-SAAS_Chr15g00862	non-pur	gene-OR8K60	Olfactory receptor 8K3 OS=Homo sapiens OX=9606 GN=OR8K3 PE=3 SV=1
Chr15	87341671	87342630	T2T-cattle1.0-SAAS_Chr15g00863	pur	gene-OR8K1	Olfactory receptor 8K1 OS=Homo sapiens OX=9606 GN=OR8K1 PE=2 SV=1
Chr15	87359847	87360773	T2T-cattle1.0-SAAS_Chr15g00864	pur	gene-OR8J19	Olfactory receptor 8J3 OS=Homo sapiens OX=9606 GN=OR8J3 PE=3 SV=1
Chr15	87364674	87365606	T2T-cattle1.0-SAAS_Chr15g00865	pur	gene-OR8J16	Olfactory receptor 8J3 OS=Homo sapiens OX=9606 GN=OR8J3 PE=3 SV=1
Chr15	87372038	87372985	T2T-cattle1.0-SAAS_Chr15g00866	pur	gene-OR8J3F	Olfactory receptor 8J3 OS=Homo sapiens OX=9606 GN=OR8J3 PE=3 SV=1
Chr15	87431762	87432712	T2T-cattle1.0-SAAS_Chr15g00867	pur	gene-OR5AL8	Olfactory receptor 5AL1 OS=Homo sapiens OX=9606 GN=OR5AL1 PE=3 SV=1
Chr15	87460144	87461228	T2T-cattle1.0-SAAS_Chr15g00869	pur	gene-OR8K62	Olfactory receptor 8K3 OS=Homo sapiens OX=9606 GN=OR8K3 PE=3 SV=1
Chr15	87551766	87552686	T2T-cattle1.0-SAAS_Chr15g00870	pur	gene-OR5T2	Olfactory receptor 5T2 OS=Homo sapiens OX=9606 GN=OR5T2 PE=2 SV=3
Chr15	87593770	87594708	T2T-cattle1.0-SAAS_Chr15g00872	pur	gene-OR9G4	Olfactory receptor 9G4 OS=Homo sapiens OX=9606 GN=OR9G4 PE=3 SV=2
Chr15	87608900	87609830	T2T-cattle1.0-SAAS_Chr15g00873	pur	gene-OR9G10C	Olfactory receptor 1013 OS=Mus musculus OX=10090 GN=Olfr1013 PE=3 SV=1
Chr15	87649660	87650544	T2T-cattle1.0-SAAS_Chr15g00874	pur	gene-OR8K63	Olfactory receptor 8K3 OS=Homo sapiens OX=9606 GN=OR8K3 PE=3 SV=1
Chr15	87664007	87664948	T2T-cattle1.0-SAAS_Chr15g00875	pur	gene-OR8K60	Olfactory receptor 8K3 OS=Homo sapiens OX=9606 GN=OR8K3 PE=3 SV=1
Chr15	88734399	88738428	T2T-cattle1.0-SAAS_Chr15g00906	non-pur	gene-LOC781990	Proteoglycan 3 OS=Homo sapiens OX=9606 GN=PRG3 PE=1 SV=2
Chr15	88792145	88796174	T2T-cattle1.0-SAAS_Chr15g00909	non-pur	gene-LOC781990	Proteoglycan 3 OS=Homo sapiens OX=9606 GN=PRG3 PE=1 SV=2
Chr18	55553801	55581747	T2T-cattle1.0-SAAS_Chr18g00582	non-pur	gene-LOC515276	Galectin-16 OS=Homo sapiens OX=9606 GN=LGALS16 PE=2 SV=1
Chr18	55590927	55618868	T2T-cattle1.0-SAAS_Chr18g00583	non-pur	gene-LOC515276	Galectin-16 OS=Homo sapiens OX=9606 GN=LGALS16 PE=2 SV=1
Chr18	66216974	66222129	T2T-cattle1.0-SAAS_Chr18g00993	non-pur	gene-LOC132342374	Natural cytotoxicity triggering receptor 3 ligand 1 OS=Homo sapiens OX=9606 GN=NCR3LG1 PE=1 SV=1
Chr18	66469904	66497968	T2T-cattle1.0-SAAS_Chr18g00999	pur	gene-LOC112442366	Zinc finger protein 845 OS=Homo sapiens OX=9606 GN=ZNF845 PE=1 SV=3
Chr18	66479456	66540073	T2T-cattle1.0-SAAS_Chr18g01000	pur	gene-LOC112442366	Zinc finger protein 845 OS=Homo sapiens OX=9606 GN=ZNF845 PE=1 SV=3
Chr18	67882746	67899815	T2T-cattle1.0-SAAS_Chr18g01043	non-pur	gene-MGC138914	Cationic amino acid transporter 3 OS=Homo sapiens OX=9606 GN=SLC7A3 PE=1 SV=1
Chr18	68073066	68088323	T2T-cattle1.0-SAAS_Chr18g01046	pur	gene-MGC138914	Cationic amino acid transporter 3 OS=Homo sapiens OX=9606 GN=SLC7A3 PE=1 SV=1
Chr18	68322611	68324715	T2T-cattle1.0-SAAS_Chr18g01055	pur	gene-LOC538810	Solute carrier family 2, facilitated glucose transporter member 3 OS=Ovis aries OX=9940 GN=SLC2A3 PE=2 SV=1
Chr18	70495587	70500489	T2T-cattle1.0-SAAS_Chr18g01174	non-pur	gene-ZSCAN5B	Zinc finger and SCAN domain-containing protein 5B OS=Homo sapiens OX=9606 GN=ZSCAN5B PE=3 SV=1
Chr18	70507288	70509041	T2T-cattle1.0-SAAS_Chr18g01175	non-pur	gene-LOC132342890	Protein FAM32A OS=Pongo abelii OX=9601 GN=FAM32A PE=3 SV=1
Chr18	70516193	70516830	T2T-cattle1.0-SAAS_Chr18g01176	non-pur	gene-LOC790896	Protein FAM32A OS=Pongo abelii OX=9601 GN=FAM32A PE=3 SV=1
Chr18	70517703	70522440	T2T-cattle1.0-SAAS_Chr18g01177	non-pur	gene-LOC768229	Zinc finger and SCAN domain-containing protein 5B OS=Homo sapiens OX=9606 GN=ZSCAN5B PE=3 SV=1
Chr18	70531312	70536168	T2T-cattle1.0-SAAS_Chr18g01178	pur	gene-ZSCAN5B	Zinc finger and SCAN domain-containing protein 5B OS=Homo sapiens OX=9606 GN=ZSCAN5B PE=3 SV=1
Chr18	70542975	70544728	T2T-cattle1.0-SAAS_Chr18g01179	pur	gene-LOC132342890	Protein FAM32A OS=Pongo abelii OX=9601 GN=FAM32A PE=3 SV=1
Chr18	70551877	70552514	T2T-cattle1.0-SAAS_Chr18g01180	pur	gene-LOC790896	Protein FAM32A OS=Pongo abelii OX=9601 GN=FAM32A PE=3 SV=1
Chr18	70553385	70558119	T2T-cattle1.0-SAAS_Chr18g01181	pur	gene-LOC768229	Zinc finger and SCAN domain-containing protein 5B OS=Homo sapiens OX=9606 GN=ZSCAN5B PE=3 SV=1
Chr18	70577509	70579263	T2T-cattle1.0-SAAS_Chr18g01182	pur	gene-LOC132342890	Protein FAM32A OS=Pongo abelii OX=9601 GN=FAM32A PE=3 SV=1
Chr18	70613159	70613796	T2T-cattle1.0-SAAS_Chr18g01184	non-pur	gene-LOC790896	Protein FAM32A OS=Pongo abelii OX=9601 GN=FAM32A PE=3 SV=1
Chr19	21848530	21849465	T2T-cattle1.0-SAAS_Chr19g00049	pur	gene-OR4D2F	Olfactory receptor 4D2 OS=Homo sapiens OX=9606 GN=OR4D2 PE=2 SV=1
Chr19	21856975	21857910	T2T-cattle1.0-SAAS_Chr19g00050	non-pur	gene-OR4D2F	Olfactory receptor 4D2 OS=Homo sapiens OX=9606 GN=OR4D2 PE=2 SV=1
Chr19	54120177	54137388	T2T-cattle1.0-SAAS_Chr19g00751	non-pur	gene-KRTAP9-2	Keratin-associated protein 9-7 OS=Homo sapiens OX=9606 GN=KRTAP9-7 PE=3 SV=1
Chr19	54123475	54124551	T2T-cattle1.0-SAAS_Chr19g00752	non-pur	gene-LOC112442670	Keratin-associated protein 9-7 OS=Homo sapiens OX=9606 GN=KRTAP9-7 PE=3 SV=1
Chr19	54139920	54140996	T2T-cattle1.0-SAAS_Chr19g00753	non-pur	gene-LOC112442670	Keratin-associated protein 9-7 OS=Homo sapiens OX=9606 GN=KRTAP9-7 PE=3 SV=1
Chr19	54153080	54170391	T2T-cattle1.0-SAAS_Chr19g00754	pur	gene-KRTAP9-2	Keratin-associated protein 9-7 OS=Homo sapiens OX=9606 GN=KRTAP9-7 PE=3 SV=1
Chr19	54186009	54187219	T2T-cattle1.0-SAAS_Chr19g00756	pur	gene-LOC112442671	Keratin-associated protein 9-7 OS=Homo sapiens OX=9606 GN=KRTAP9-7 PE=3 SV=1
Chr19	54189595	54190586	T2T-cattle1.0-SAAS_Chr19g00757	non-pur	gene-LOC100138853	Keratin-associated protein 9-7 OS=Homo sapiens OX=9606 GN=KRTAP9-7 PE=3 SV=1
Chr19	54202457	54203667	T2T-cattle1.0-SAAS_Chr19g00758	non-pur	gene-LOC112442671	Keratin-associated protein 9-7 OS=Homo sapiens OX=9606 GN=KRTAP9-7 PE=3 SV=1
Chr19	54205934	54207010	T2T-cattle1.0-SAAS_Chr19g00759	non-pur	gene-LOC112442670	Keratin-associated protein 9-7 OS=Homo sapiens OX=9606 GN=KRTAP9-7 PE=3 SV=1
Chr19	54216822	54217813	T2T-cattle1.0-SAAS_Chr19g00760	non-pur	gene-LOC100138853	Keratin-associated protein 9-7 OS=Homo sapiens OX=9606 GN=KRTAP9-7 PE=3 SV=1
Chr20	11218975	11252049	T2T-cattle1.0-SAAS_Chr20g00005	pur	gene-LOC101906171	Liprin-alpha-1 OS=Homo sapiens OX=9606 GN=PPFIA1 PE=1 SV=1
Chr20	11282679	11315748	T2T-cattle1.0-SAAS_Chr20g00007	pur	gene-LOC101906171	Liprin-alpha-1 OS=Homo sapiens OX=9606 GN=PPFIA1 PE=1 SV=1
Chr20	11526840	11559916	T2T-cattle1.0-SAAS_Chr20g00009	pur	gene-LOC101906171	Liprin-alpha-1 OS=Homo sapiens OX=9606 GN=PPFIA1 PE=1 SV=1
Chr20	11834031	11867107	T2T-cattle1.0-SAAS_Chr20g00011	pur	gene-LOC101906171	Liprin-alpha-1 OS=Homo sapiens OX=9606 GN=PPFIA1 PE=1 SV=1
Chr20	12360953	12373271	T2T-cattle1.0-SAAS_Chr20g00014	pur	gene-LOC100299144	Liprin-alpha-1 OS=Homo sapiens OX=9606 GN=PPFIA1 PE=1 SV=1
Chr20	12424287	12429105	T2T-cattle1.0-SAAS_Chr20g00015	pur	gene-LOC112445429	Liprin-alpha-1 OS=Homo sapiens OX=9606 GN=PPFIA1 PE=1 SV=1
Chr20	12544317	12577382	T2T-cattle1.0-SAAS_Chr20g00016	pur	gene-LOC101906171	Liprin-alpha-1 OS=Homo sapiens OX=9606 GN=PPFIA1 PE=1 SV=1
Chr20	12717346	12750424	T2T-cattle1.0-SAAS_Chr20g00017	pur	gene-LOC101906171	Liprin-alpha-1 OS=Homo sapiens OX=9606 GN=PPFIA1 PE=1 SV=1
Chr20	13255950	13268295	T2T-cattle1.0-SAAS_Chr20g00019	pur	gene-LOC100299144	Liprin-alpha-1 OS=Homo sapiens OX=9606 GN=PPFIA1 PE=1 SV=1
Chr20	13319277	13324089	T2T-cattle1.0-SAAS_Chr20g00020	pur	gene-LOC112445429	Liprin-alpha-1 OS=Homo sapiens OX=9606 GN=PPFIA1 PE=1 SV=1
Chr20	13413695	13446770	T2T-cattle1.0-SAAS_Chr20g00021	pur	gene-LOC101906171	Liprin-alpha-1 OS=Homo sapiens OX=9606 GN=PPFIA1 PE=1 SV=1
Chr20	13535137	13547459	T2T-cattle1.0-SAAS_Chr20g00024	pur	gene-LOC100299144	Liprin-alpha-1 OS=Homo sapiens OX=9606 GN=PPFIA1 PE=1 SV=1
Chr20	13598421	13603240	T2T-cattle1.0-SAAS_Chr20g00025	pur	gene-LOC112445429	Liprin-alpha-1 OS=Homo sapiens OX=9606 GN=PPFIA1 PE=1 SV=1
Chr20	13718596	13751655	T2T-cattle1.0-SAAS_Chr20g00026	pur	gene-LOC101906171	Liprin-alpha-1 OS=Homo sapiens OX=9606 GN=PPFIA1 PE=1 SV=1
Chr20	13879136	13891480	T2T-cattle1.0-SAAS_Chr20g00028	pur	gene-LOC100299144	Liprin-alpha-1 OS=Homo sapiens OX=9606 GN=PPFIA1 PE=1 SV=1
Chr20	13942471	13947286	T2T-cattle1.0-SAAS_Chr20g00029	pur	gene-LOC112445429	Liprin-alpha-1 OS=Homo sapiens OX=9606 GN=PPFIA1 PE=1 SV=1
Chr20	14062617	14095692	T2T-cattle1.0-SAAS_Chr20g00030	pur	gene-LOC101906171	Liprin-alpha-1 OS=Homo sapiens OX=9606 GN=PPFIA1 PE=1 SV=1
Chr20	14193931	14227001	T2T-cattle1.0-SAAS_Chr20g00032	pur	gene-LOC101906171	Liprin-alpha-1 OS=Homo sapiens OX=9606 GN=PPFIA1 PE=1 SV=1
Chr20	14293019	14326093	T2T-cattle1.0-SAAS_Chr20g00033	pur	gene-LOC101906171	Liprin-alpha-1 OS=Homo sapiens OX=9606 GN=PPFIA1 PE=1 SV=1
Chr20	14725705	14738038	T2T-cattle1.0-SAAS_Chr20g00034	pur	gene-LOC100299144	Liprin-alpha-1 OS=Homo sapiens OX=9606 GN=PPFIA1 PE=1 SV=1
Chr20	14788938	14793750	T2T-cattle1.0-SAAS_Chr20g00035	pur	gene-LOC112445429	Liprin-alpha-1 OS=Homo sapiens OX=9606 GN=PPFIA1 PE=1 SV=1
Chr20	14883328	14916409	T2T-cattle1.0-SAAS_Chr20g00036	pur	gene-LOC101906171	Liprin-alpha-1 OS=Homo sapiens OX=9606 GN=PPFIA1 PE=1 SV=1
Chr20	14948302	14981377	T2T-cattle1.0-SAAS_Chr20g00038	pur	gene-LOC101906171	Liprin-alpha-1 OS=Homo sapiens OX=9606 GN=PPFIA1 PE=1 SV=1
Chr20	15012104	15045187	T2T-cattle1.0-SAAS_Chr20g00039	pur	gene-LOC101906171	Liprin-alpha-1 OS=Homo sapiens OX=9606 GN=PPFIA1 PE=1 SV=1
Chr20	15062638	15074959	T2T-cattle1.0-SAAS_Chr20g00041	pur	gene-LOC100299144	Liprin-alpha-1 OS=Homo sapiens OX=9606 GN=PPFIA1 PE=1 SV=1
Chr20	15125932	15130755	T2T-cattle1.0-SAAS_Chr20g00042	pur	gene-LOC112445429	Liprin-alpha-1 OS=Homo sapiens OX=9606 GN=PPFIA1 PE=1 SV=1
Chr20	15245939	15279013	T2T-cattle1.0-SAAS_Chr20g00043	pur	gene-LOC101906171	Liprin-alpha-1 OS=Homo sapiens OX=9606 GN=PPFIA1 PE=1 SV=1
Chr20	15367276	15379599	T2T-cattle1.0-SAAS_Chr20g00046	pur	gene-LOC100299144	Liprin-alpha-1 OS=Homo sapiens OX=9606 GN=PPFIA1 PE=1 SV=1
Chr20	15430564	15435376	T2T-cattle1.0-SAAS_Chr20g00047	pur	gene-LOC112445429	Liprin-alpha-1 OS=Homo sapiens OX=9606 GN=PPFIA1 PE=1 SV=1
Chr20	15524952	15558025	T2T-cattle1.0-SAAS_Chr20g00048	pur	gene-LOC101906171	Liprin-alpha-1 OS=Homo sapiens OX=9606 GN=PPFIA1 PE=1 SV=1
Chr20	15589912	15622984	T2T-cattle1.0-SAAS_Chr20g00049	pur	gene-LOC101906171	Liprin-alpha-1 OS=Homo sapiens OX=9606 GN=PPFIA1 PE=1 SV=1
Chr20	16089007	16122081	T2T-cattle1.0-SAAS_Chr20g00051	pur	gene-LOC101906171	Liprin-alpha-1 OS=Homo sapiens OX=9606 GN=PPFIA1 PE=1 SV=1
Chr20	16400179	16433261	T2T-cattle1.0-SAAS_Chr20g00054	pur	gene-LOC101906171	Liprin-alpha-1 OS=Homo sapiens OX=9606 GN=PPFIA1 PE=1 SV=1
Chr20	16520091	16553163	T2T-cattle1.0-SAAS_Chr20g00055	pur	gene-LOC101906171	Liprin-alpha-1 OS=Homo sapiens OX=9606 GN=PPFIA1 PE=1 SV=1
Chr20	16667625	16700735	T2T-cattle1.0-SAAS_Chr20g00057	pur	gene-LOC101906171	Liprin-alpha-1 OS=Homo sapiens OX=9606 GN=PPFIA1 PE=1 SV=1
Chr20	16782302	16798132	T2T-cattle1.0-SAAS_Chr20g00059	pur	gene-LOC112443211	Liprin-alpha-1 OS=Homo sapiens OX=9606 GN=PPFIA1 PE=1 SV=1
Chr20	16903036	16936111	T2T-cattle1.0-SAAS_Chr20g00060	pur	gene-LOC101906171	Liprin-alpha-1 OS=Homo sapiens OX=9606 GN=PPFIA1 PE=1 SV=1
Chr20	17048042	17081126	T2T-cattle1.0-SAAS_Chr20g00062	pur	gene-LOC101906171	Liprin-alpha-1 OS=Homo sapiens OX=9606 GN=PPFIA1 PE=1 SV=1
Chr20	17157810	17190880	T2T-cattle1.0-SAAS_Chr20g00063	pur	gene-LOC101906171	Liprin-alpha-1 OS=Homo sapiens OX=9606 GN=PPFIA1 PE=1 SV=1
Chr20	17342692	17355029	T2T-cattle1.0-SAAS_Chr20g00065	pur	gene-LOC100299144	Liprin-alpha-1 OS=Homo sapiens OX=9606 GN=PPFIA1 PE=1 SV=1
Chr20	17406015	17410831	T2T-cattle1.0-SAAS_Chr20g00066	pur	gene-LOC112445429	Liprin-alpha-1 OS=Homo sapiens OX=9606 GN=PPFIA1 PE=1 SV=1
Chr20	17526027	17559097	T2T-cattle1.0-SAAS_Chr20g00067	pur	gene-LOC101906171	Liprin-alpha-1 OS=Homo sapiens OX=9606 GN=PPFIA1 PE=1 SV=1
Chr20	17647609	17679549	T2T-cattle1.0-SAAS_Chr20g00069	pur	gene-LOC101906171	Liprin-alpha-1 OS=Homo sapiens OX=9606 GN=PPFIA1 PE=1 SV=1
Chr21	15211526	15227338	T2T-cattle1.0-SAAS_Chr21g00007	pur	gene-LOC112443211	Liprin-alpha-1 OS=Homo sapiens OX=9606 GN=PPFIA1 PE=1 SV=1
Chr21	68534921	68535511	T2T-cattle1.0-SAAS_Chr21g00345	pur	gene-LOC784058	Dynein light chain 1, cytoplasmic OS=Rattus norvegicus OX=10116 GN=Dynll1 PE=1 SV=1
Chr22	13568723	13573529	T2T-cattle1.0-SAAS_Chr22g00001	pur	gene-LOC112445429	Liprin-alpha-1 OS=Homo sapiens OX=9606 GN=PPFIA1 PE=1 SV=1
Chr22	13691804	13724874	T2T-cattle1.0-SAAS_Chr22g00002	pur	gene-LOC101906171	Liprin-alpha-1 OS=Homo sapiens OX=9606 GN=PPFIA1 PE=1 SV=1
Chr23	14209726	14210688	T2T-cattle1.0-SAAS_Chr23g00014	pur	gene-OR4C181	Olfactory receptor 4C46 OS=Homo sapiens OX=9606 GN=OR4C46 PE=3 SV=1
Chr23	14233407	14234318	T2T-cattle1.0-SAAS_Chr23g00015	pur	gene-OR4C188	Olfactory receptor 4C46 OS=Homo sapiens OX=9606 GN=OR4C46 PE=3 SV=1
Chr23	14686878	14687807	T2T-cattle1.0-SAAS_Chr23g00019	pur	gene-OR4C160	Olfactory receptor 4C6 OS=Homo sapiens OX=9606 GN=OR4C6 PE=2 SV=1
Chr23	14702826	14703377	T2T-cattle1.0-SAAS_Chr23g00020	pur	gene-LOC104970693	Gag-Pro-Pol polyprotein OS=Simian retrovirus SRV-2 OX=39068 GN=pol PE=3 SV=2
Chr23	14763237	14764729	T2T-cattle1.0-SAAS_Chr23g00021	pur	gene-OR4A2	Olfactory receptor 4A15 OS=Homo sapiens OX=9606 GN=OR4A15 PE=3 SV=3
Chr23	44141371	44142321	T2T-cattle1.0-SAAS_Chr23g00449	non-pur	gene-OR12D23	Olfactory receptor 12D1 OS=Homo sapiens OX=9606 GN=OR12D1 PE=3 SV=1
Chr23	44411361	44412293	T2T-cattle1.0-SAAS_Chr23g00469	pur	gene-OR2H18	Olfactory receptor 2H1 OS=Homo sapiens OX=9606 GN=OR2H1 PE=2 SV=1
Chr23	44419756	44420688	T2T-cattle1.0-SAAS_Chr23g00470	pur	gene-OR2H19	Olfactory receptor 2G6 OS=Homo sapiens OX=9606 GN=OR2G6 PE=2 SV=1
Chr23	44448307	44449239	T2T-cattle1.0-SAAS_Chr23g00472	non-pur	gene-OR2H19	Olfactory receptor 2G6 OS=Homo sapiens OX=9606 GN=OR2G6 PE=2 SV=1
Chr24	10560238	10592225	T2T-cattle1.0-SAAS_Chr24g00001	pur	gene-LOC101906171	Liprin-alpha-1 OS=Homo sapiens OX=9606 GN=PPFIA1 PE=1 SV=1
Chr24	10711036	10711968	T2T-cattle1.0-SAAS_Chr24g00002	pur	gene-OR9M1	Olfactory receptor 1020 OS=Mus musculus OX=10090 GN=Olfr1020 PE=3 SV=1
Chr24	10863879	10864811	T2T-cattle1.0-SAAS_Chr24g00003	pur	gene-OR9M1D	Olfactory receptor 1020 OS=Mus musculus OX=10090 GN=Olfr1020 PE=3 SV=1
Chr24	12410319	12411251	T2T-cattle1.0-SAAS_Chr24g00006	non-pur	gene-OR9M1	Olfactory receptor 1020 OS=Mus musculus OX=10090 GN=Olfr1020 PE=3 SV=1
Chr24	74162662	74164922	T2T-cattle1.0-SAAS_Chr24g00306	non-pur	gene-LOC112445471	Serpin B3 OS=Homo sapiens OX=9606 GN=SERPINB3 PE=1 SV=2
Chr24	74191848	74199227	T2T-cattle1.0-SAAS_Chr24g00308	non-pur	gene-LOC112445471	Serpin B3 OS=Homo sapiens OX=9606 GN=SERPINB3 PE=1 SV=2
Chr25	4661235	4692980	T2T-cattle1.0-SAAS_Chr25g00002	pur	gene-LOC101906171	Liprin-alpha-1 OS=Homo sapiens OX=9606 GN=PPFIA1 PE=1 SV=1
Chr25	4819094	4819555	T2T-cattle1.0-SAAS_Chr25g00003	pur	gene-LOC112445739	60S ribosomal protein L7a OS=Bos taurus OX=9913 GN=RPL7A PE=2 SV=3
Chr25	5129333	5161105	T2T-cattle1.0-SAAS_Chr25g00005	pur	gene-LOC101906171	Liprin-alpha-1 OS=Homo sapiens OX=9606 GN=PPFIA1 PE=1 SV=1
Chr25	5245218	5250009	T2T-cattle1.0-SAAS_Chr25g00007	pur	gene-LOC112445429	Liprin-alpha-1 OS=Homo sapiens OX=9606 GN=PPFIA1 PE=1 SV=1
Chr25	5348071	5379840	T2T-cattle1.0-SAAS_Chr25g00008	pur	gene-LOC101906171	Liprin-alpha-1 OS=Homo sapiens OX=9606 GN=PPFIA1 PE=1 SV=1
Chr25	5467173	5467634	T2T-cattle1.0-SAAS_Chr25g00009	pur	gene-LOC112445739	60S ribosomal protein L7a OS=Bos taurus OX=9913 GN=RPL7A PE=2 SV=3
Chr25	5672014	5676805	T2T-cattle1.0-SAAS_Chr25g00012	pur	gene-LOC112445429	Liprin-alpha-1 OS=Homo sapiens OX=9606 GN=PPFIA1 PE=1 SV=1
Chr25	5779358	5811295	T2T-cattle1.0-SAAS_Chr25g00015	pur	gene-LOC101906171	Liprin-alpha-1 OS=Homo sapiens OX=9606 GN=PPFIA1 PE=1 SV=1
Chr25	8333563	8337857	T2T-cattle1.0-SAAS_Chr25g00165	non-pur	gene-LOC618541	Interleukin-32 OS=Homo sapiens OX=9606 GN=IL32 PE=1 SV=3
Chr25	8343965	8348255	T2T-cattle1.0-SAAS_Chr25g00166	non-pur	gene-LOC618541	Interleukin-32 OS=Homo sapiens OX=9606 GN=IL32 PE=1 SV=3
Chr27	8638898	8671980	T2T-cattle1.0-SAAS_Chr27g00006	pur	gene-LOC101906171	Liprin-alpha-1 OS=Homo sapiens OX=9606 GN=PPFIA1 PE=1 SV=1
Chr27	8694166	8733262	T2T-cattle1.0-SAAS_Chr27g00008	pur	gene-LOC100299144	Liprin-alpha-1 OS=Homo sapiens OX=9606 GN=PPFIA1 PE=1 SV=1
Chr27	8757441	8762233	T2T-cattle1.0-SAAS_Chr27g00009	pur	gene-LOC112445429	Liprin-alpha-1 OS=Homo sapiens OX=9606 GN=PPFIA1 PE=1 SV=1
Chr27	16124598	16133676	T2T-cattle1.0-SAAS_Chr27g00073	pur	gene-LOC101907227	Protein FAM90A27P OS=Homo sapiens OX=9606 GN=FAM90A27P PE=3 SV=2
Chr29	10150477	10160056	T2T-cattle1.0-SAAS_Chr29g00041	non-pur	gene-LOC786377	Tripartite motif-containing protein 64 OS=Homo sapiens OX=9606 GN=TRIM64 PE=2 SV=4
Chr29	10207601	10214607	T2T-cattle1.0-SAAS_Chr29g00042	non-pur	gene-LOC100336475	PRAME family member 8 OS=Homo sapiens OX=9606 GN=PRAMEF8 PE=2 SV=2
Chr29	10229191	10230686	T2T-cattle1.0-SAAS_Chr29g00043	non-pur	gene-LOC112444838	Upstream-binding factor 1-like protein 1 OS=Homo sapiens OX=9606 GN=UBTFL1 PE=3 SV=1
Chr29	10288499	10289994	T2T-cattle1.0-SAAS_Chr29g00044	pur	gene-LOC112444838	Upstream-binding factor 1-like protein 1 OS=Homo sapiens OX=9606 GN=UBTFL1 PE=3 SV=1
Chr29	10304563	10311564	T2T-cattle1.0-SAAS_Chr29g00045	pur	gene-LOC100336475	PRAME family member 8 OS=Homo sapiens OX=9606 GN=PRAMEF8 PE=2 SV=2
Chr29	10359097	10368688	T2T-cattle1.0-SAAS_Chr29g00046	pur	gene-LOC786377	Tripartite motif-containing protein 64 OS=Homo sapiens OX=9606 GN=TRIM64 PE=2 SV=4
Chr29	56030856	56041469	T2T-cattle1.0-SAAS_Chr29g00665	non-pur	gene-LOC613699	Interferon-induced transmembrane protein 1 OS=Homo sapiens OX=9606 GN=IFITM1 PE=1 SV=3
Chr29	56100939	56111557	T2T-cattle1.0-SAAS_Chr29g00668	pur	gene-LOC613699	Interferon-induced transmembrane protein 1 OS=Homo sapiens OX=9606 GN=IFITM1 PE=1 SV=3
ChrX	5225458	5229106	T2T-cattle1.0-SAAS_ChrXg00047	pur	gene-LOC112445054	Cancer/testis antigen 47A OS=Homo sapiens OX=9606 GN=CT47A1 PE=2 SV=1
ChrX	5298119	5301766	T2T-cattle1.0-SAAS_ChrXg00049	non-pur	gene-LOC112445054	Cancer/testis antigen 47A OS=Homo sapiens OX=9606 GN=CT47A1 PE=2 SV=1
ChrX	5332449	5336381	T2T-cattle1.0-SAAS_ChrXg00050	non-pur	gene-LOC107131987	Cancer/testis antigen 47A OS=Homo sapiens OX=9606 GN=CT47A1 PE=2 SV=1
ChrX	5438477	5442409	T2T-cattle1.0-SAAS_ChrXg00054	pur	gene-LOC107131987	Cancer/testis antigen 47A OS=Homo sapiens OX=9606 GN=CT47A1 PE=2 SV=1
ChrX	5472794	5476726	T2T-cattle1.0-SAAS_ChrXg00055	pur	gene-LOC107131987	Cancer/testis antigen 47A OS=Homo sapiens OX=9606 GN=CT47A1 PE=2 SV=1
ChrX	10682083	10686314	T2T-cattle1.0-SAAS_ChrXg00067	pur	gene-LOC112445142	DDB1- and CUL4-associated factor 12-like protein 2 OS=Homo sapiens OX=9606 GN=DCAF12L2 PE=2 SV=1
ChrX	10690707	10693366	T2T-cattle1.0-SAAS_ChrXg00069	pur	gene-LOC100847467	DDB1- and CUL4-associated factor 12-like protein 2 OS=Homo sapiens OX=9606 GN=DCAF12L2 PE=2 SV=1
ChrX	10695020	10697679	T2T-cattle1.0-SAAS_ChrXg00070	pur	gene-LOC100847467	DDB1- and CUL4-associated factor 12-like protein 2 OS=Homo sapiens OX=9606 GN=DCAF12L2 PE=2 SV=1
ChrX	10699333	10701992	T2T-cattle1.0-SAAS_ChrXg00071	pur	gene-LOC100847467	DDB1- and CUL4-associated factor 12-like protein 2 OS=Homo sapiens OX=9606 GN=DCAF12L2 PE=2 SV=1
ChrX	10703646	10706305	T2T-cattle1.0-SAAS_ChrXg00072	pur	gene-LOC100847467	DDB1- and CUL4-associated factor 12-like protein 2 OS=Homo sapiens OX=9606 GN=DCAF12L2 PE=2 SV=1
ChrX	10707959	10710619	T2T-cattle1.0-SAAS_ChrXg00073	pur	gene-LOC100847467	DDB1- and CUL4-associated factor 12-like protein 2 OS=Homo sapiens OX=9606 GN=DCAF12L2 PE=2 SV=1
ChrX	10728998	10733226	T2T-cattle1.0-SAAS_ChrXg00074	non-pur	gene-LOC112445142	DDB1- and CUL4-associated factor 12-like protein 2 OS=Homo sapiens OX=9606 GN=DCAF12L2 PE=2 SV=1
ChrX	20098494	20110950	T2T-cattle1.0-SAAS_ChrXg00199	pur	gene-LOC132342124	Zinc finger protein 75D OS=Homo sapiens OX=9606 GN=ZNF75D PE=2 SV=2
ChrX	29738381	29739115	T2T-cattle1.0-SAAS_ChrXg00262	non-pur	gene-MGC148328	Spermatid nuclear transition protein 3 OS=Ovis aries OX=9940 PE=1 SV=3
ChrX	29742707	29743441	T2T-cattle1.0-SAAS_ChrXg00263	non-pur	gene-MGC148328	Spermatid nuclear transition protein 3 OS=Ovis aries OX=9940 PE=1 SV=3
ChrX	29747033	29747767	T2T-cattle1.0-SAAS_ChrXg00264	pur	gene-MGC148328	Spermatid nuclear transition protein 3 OS=Ovis aries OX=9940 PE=1 SV=3
ChrX	29750962	29752096	T2T-cattle1.0-SAAS_ChrXg00265	pur	gene-LOC781841	Spermatid nuclear transition protein 3 OS=Ovis aries OX=9940 PE=1 SV=3
ChrX	29755686	29756420	T2T-cattle1.0-SAAS_ChrXg00266	pur	gene-MGC148328	Spermatid nuclear transition protein 3 OS=Ovis aries OX=9940 PE=1 SV=3
ChrX	29760012	29760746	T2T-cattle1.0-SAAS_ChrXg00267	non-pur	gene-MGC148328	Spermatid nuclear transition protein 3 OS=Ovis aries OX=9940 PE=1 SV=3
ChrX	29764339	29765073	T2T-cattle1.0-SAAS_ChrXg00268	non-pur	gene-MGC148328	Spermatid nuclear transition protein 3 OS=Ovis aries OX=9940 PE=1 SV=3
ChrX	29920846	29921580	T2T-cattle1.0-SAAS_ChrXg00269	pur	gene-MGC148328	Spermatid nuclear transition protein 3 OS=Ovis aries OX=9940 PE=1 SV=3
ChrX	29925172	29925906	T2T-cattle1.0-SAAS_ChrXg00270	pur	gene-MGC148328	Spermatid nuclear transition protein 3 OS=Ovis aries OX=9940 PE=1 SV=3
ChrX	29929499	29930233	T2T-cattle1.0-SAAS_ChrXg00271	pur	gene-MGC148328	Spermatid nuclear transition protein 3 OS=Ovis aries OX=9940 PE=1 SV=3
ChrX	29933826	29934560	T2T-cattle1.0-SAAS_ChrXg00272	pur	gene-MGC148328	Spermatid nuclear transition protein 3 OS=Ovis aries OX=9940 PE=1 SV=3
ChrX	29938153	29938887	T2T-cattle1.0-SAAS_ChrXg00273	pur	gene-MGC148328	Spermatid nuclear transition protein 3 OS=Ovis aries OX=9940 PE=1 SV=3
ChrX	29942481	29943215	T2T-cattle1.0-SAAS_ChrXg00274	pur	gene-MGC148328	Spermatid nuclear transition protein 3 OS=Ovis aries OX=9940 PE=1 SV=3
ChrX	29946804	29947938	T2T-cattle1.0-SAAS_ChrXg00275	pur	gene-LOC781841	Spermatid nuclear transition protein 3 OS=Ovis aries OX=9940 PE=1 SV=3
ChrX	29951134	29951868	T2T-cattle1.0-SAAS_ChrXg00276	pur	gene-MGC148328	Spermatid nuclear transition protein 3 OS=Ovis aries OX=9940 PE=1 SV=3
ChrX	29955455	29956189	T2T-cattle1.0-SAAS_ChrXg00277	pur	gene-MGC148328	Spermatid nuclear transition protein 3 OS=Ovis aries OX=9940 PE=1 SV=3
ChrX	29959772	29960506	T2T-cattle1.0-SAAS_ChrXg00278	pur	gene-MGC148328	Spermatid nuclear transition protein 3 OS=Ovis aries OX=9940 PE=1 SV=3
ChrX	29964088	29964822	T2T-cattle1.0-SAAS_ChrXg00279	pur	gene-MGC148328	Spermatid nuclear transition protein 3 OS=Ovis aries OX=9940 PE=1 SV=3
ChrX	29968404	29969138	T2T-cattle1.0-SAAS_ChrXg00280	pur	gene-MGC148328	Spermatid nuclear transition protein 3 OS=Ovis aries OX=9940 PE=1 SV=3
ChrX	29972720	29973454	T2T-cattle1.0-SAAS_ChrXg00281	pur	gene-MGC148328	Spermatid nuclear transition protein 3 OS=Ovis aries OX=9940 PE=1 SV=3
ChrX	29977041	29977775	T2T-cattle1.0-SAAS_ChrXg00282	pur	gene-MGC148328	Spermatid nuclear transition protein 3 OS=Ovis aries OX=9940 PE=1 SV=3
ChrX	29981361	29982095	T2T-cattle1.0-SAAS_ChrXg00283	pur	gene-MGC148328	Spermatid nuclear transition protein 3 OS=Ovis aries OX=9940 PE=1 SV=3
ChrX	29998629	29999363	T2T-cattle1.0-SAAS_ChrXg00284	pur	gene-MGC148328	Spermatid nuclear transition protein 3 OS=Ovis aries OX=9940 PE=1 SV=3
ChrX	30011585	30012319	T2T-cattle1.0-SAAS_ChrXg00285	pur	gene-MGC148328	Spermatid nuclear transition protein 3 OS=Ovis aries OX=9940 PE=1 SV=3
ChrX	30015902	30016636	T2T-cattle1.0-SAAS_ChrXg00286	pur	gene-MGC148328	Spermatid nuclear transition protein 3 OS=Ovis aries OX=9940 PE=1 SV=3
ChrX	30033174	30033908	T2T-cattle1.0-SAAS_ChrXg00287	pur	gene-MGC148328	Spermatid nuclear transition protein 3 OS=Ovis aries OX=9940 PE=1 SV=3
ChrX	30037489	30039320	T2T-cattle1.0-SAAS_ChrXg00288	pur	gene-LOC112445077	Spermatid nuclear transition protein 3 OS=Ovis aries OX=9940 PE=1 SV=3
ChrX	30041806	30042540	T2T-cattle1.0-SAAS_ChrXg00289	pur	gene-MGC148328	Spermatid nuclear transition protein 3 OS=Ovis aries OX=9940 PE=1 SV=3
ChrX	30050432	30051166	T2T-cattle1.0-SAAS_ChrXg00291	pur	gene-MGC148328	Spermatid nuclear transition protein 3 OS=Ovis aries OX=9940 PE=1 SV=3
ChrX	30054740	30056570	T2T-cattle1.0-SAAS_ChrXg00292	pur	gene-LOC112445077	Spermatid nuclear transition protein 3 OS=Ovis aries OX=9940 PE=1 SV=3
ChrX	30063365	30065195	T2T-cattle1.0-SAAS_ChrXg00293	pur	gene-LOC112445077	Spermatid nuclear transition protein 3 OS=Ovis aries OX=9940 PE=1 SV=3
ChrX	30067676	30070756	T2T-cattle1.0-SAAS_ChrXg00294	pur	gene-LOC100850168	Spermatid nuclear transition protein 3 OS=Ovis aries OX=9940 PE=1 SV=3
ChrX	30071990	30075079	T2T-cattle1.0-SAAS_ChrXg00295	pur	gene-LOC100850168	Spermatid nuclear transition protein 3 OS=Ovis aries OX=9940 PE=1 SV=3
ChrX	30076309	30078139	T2T-cattle1.0-SAAS_ChrXg00296	pur	gene-LOC112445077	Spermatid nuclear transition protein 3 OS=Ovis aries OX=9940 PE=1 SV=3
ChrX	30080620	30082452	T2T-cattle1.0-SAAS_ChrXg00297	pur	gene-LOC112445077	Spermatid nuclear transition protein 3 OS=Ovis aries OX=9940 PE=1 SV=3
ChrX	30084933	30086765	T2T-cattle1.0-SAAS_ChrXg00298	pur	gene-LOC112445077	Spermatid nuclear transition protein 3 OS=Ovis aries OX=9940 PE=1 SV=3
ChrX	30097882	30099714	T2T-cattle1.0-SAAS_ChrXg00299	pur	gene-LOC112445077	Spermatid nuclear transition protein 3 OS=Ovis aries OX=9940 PE=1 SV=3
ChrX	30102198	30104030	T2T-cattle1.0-SAAS_ChrXg00300	pur	gene-LOC112445077	Spermatid nuclear transition protein 3 OS=Ovis aries OX=9940 PE=1 SV=3
ChrX	30106514	30108346	T2T-cattle1.0-SAAS_ChrXg00301	pur	gene-LOC112445077	Spermatid nuclear transition protein 3 OS=Ovis aries OX=9940 PE=1 SV=3
ChrX	30110827	30112659	T2T-cattle1.0-SAAS_ChrXg00302	pur	gene-LOC112445077	Spermatid nuclear transition protein 3 OS=Ovis aries OX=9940 PE=1 SV=3
ChrX	30123772	30124506	T2T-cattle1.0-SAAS_ChrXg00303	pur	gene-MGC148328	Spermatid nuclear transition protein 3 OS=Ovis aries OX=9940 PE=1 SV=3
ChrX	30132406	30134244	T2T-cattle1.0-SAAS_ChrXg00304	pur	gene-LOC112445077	Spermatid nuclear transition protein 3 OS=Ovis aries OX=9940 PE=1 SV=3
ChrX	30136724	30138556	T2T-cattle1.0-SAAS_ChrXg00305	pur	gene-LOC112445077	Spermatid nuclear transition protein 3 OS=Ovis aries OX=9940 PE=1 SV=3
ChrX	30141043	30141777	T2T-cattle1.0-SAAS_ChrXg00306	pur	gene-MGC148328	Spermatid nuclear transition protein 3 OS=Ovis aries OX=9940 PE=1 SV=3
ChrX	30145360	30147198	T2T-cattle1.0-SAAS_ChrXg00307	pur	gene-LOC112445077	Spermatid nuclear transition protein 3 OS=Ovis aries OX=9940 PE=1 SV=3
ChrX	30149678	30151509	T2T-cattle1.0-SAAS_ChrXg00308	pur	gene-LOC112445077	Spermatid nuclear transition protein 3 OS=Ovis aries OX=9940 PE=1 SV=3
ChrX	30153990	30157072	T2T-cattle1.0-SAAS_ChrXg00309	pur	gene-LOC100850168	Spermatid nuclear transition protein 3 OS=Ovis aries OX=9940 PE=1 SV=3
ChrX	30158302	30161385	T2T-cattle1.0-SAAS_ChrXg00310	pur	gene-LOC100850168	Spermatid nuclear transition protein 3 OS=Ovis aries OX=9940 PE=1 SV=3
ChrX	30162617	30165700	T2T-cattle1.0-SAAS_ChrXg00311	pur	gene-LOC100850168	Spermatid nuclear transition protein 3 OS=Ovis aries OX=9940 PE=1 SV=3
ChrX	30166930	30170012	T2T-cattle1.0-SAAS_ChrXg00312	pur	gene-LOC100850168	Spermatid nuclear transition protein 3 OS=Ovis aries OX=9940 PE=1 SV=3
ChrX	30171246	30171980	T2T-cattle1.0-SAAS_ChrXg00313	pur	gene-MGC148328	Spermatid nuclear transition protein 3 OS=Ovis aries OX=9940 PE=1 SV=3
ChrX	30175555	30177387	T2T-cattle1.0-SAAS_ChrXg00314	pur	gene-LOC112445077	Spermatid nuclear transition protein 3 OS=Ovis aries OX=9940 PE=1 SV=3
ChrX	30179871	30180605	T2T-cattle1.0-SAAS_ChrXg00315	pur	gene-MGC148328	Spermatid nuclear transition protein 3 OS=Ovis aries OX=9940 PE=1 SV=3
ChrX	30184181	30186013	T2T-cattle1.0-SAAS_ChrXg00316	pur	gene-LOC112445077	Spermatid nuclear transition protein 3 OS=Ovis aries OX=9940 PE=1 SV=3
ChrX	30188494	30189628	T2T-cattle1.0-SAAS_ChrXg00317	pur	gene-LOC781841	Spermatid nuclear transition protein 3 OS=Ovis aries OX=9940 PE=1 SV=3
ChrX	30192808	30195888	T2T-cattle1.0-SAAS_ChrXg00318	pur	gene-LOC100850168	Spermatid nuclear transition protein 3 OS=Ovis aries OX=9940 PE=1 SV=3
ChrX	30197116	30198944	T2T-cattle1.0-SAAS_ChrXg00319	pur	gene-LOC112445077	Spermatid nuclear transition protein 3 OS=Ovis aries OX=9940 PE=1 SV=3
ChrX	30210044	30213124	T2T-cattle1.0-SAAS_ChrXg00320	pur	gene-LOC100850168	Spermatid nuclear transition protein 3 OS=Ovis aries OX=9940 PE=1 SV=3
ChrX	30214356	30216187	T2T-cattle1.0-SAAS_ChrXg00321	pur	gene-LOC112445077	Spermatid nuclear transition protein 3 OS=Ovis aries OX=9940 PE=1 SV=3
ChrX	30231595	30233430	T2T-cattle1.0-SAAS_ChrXg00322	pur	gene-LOC112445077	Spermatid nuclear transition protein 3 OS=Ovis aries OX=9940 PE=1 SV=3
ChrX	30235913	30237745	T2T-cattle1.0-SAAS_ChrXg00323	pur	gene-LOC112445077	Spermatid nuclear transition protein 3 OS=Ovis aries OX=9940 PE=1 SV=3
ChrX	30248860	30250689	T2T-cattle1.0-SAAS_ChrXg00324	pur	gene-LOC112445077	Spermatid nuclear transition protein 3 OS=Ovis aries OX=9940 PE=1 SV=3
ChrX	30253171	30255001	T2T-cattle1.0-SAAS_ChrXg00325	pur	gene-LOC112445077	Spermatid nuclear transition protein 3 OS=Ovis aries OX=9940 PE=1 SV=3
ChrX	30257483	30259312	T2T-cattle1.0-SAAS_ChrXg00326	pur	gene-LOC112445077	Spermatid nuclear transition protein 3 OS=Ovis aries OX=9940 PE=1 SV=3
ChrX	30261794	30263627	T2T-cattle1.0-SAAS_ChrXg00327	pur	gene-LOC112445077	Spermatid nuclear transition protein 3 OS=Ovis aries OX=9940 PE=1 SV=3
ChrX	30266112	30267948	T2T-cattle1.0-SAAS_ChrXg00328	pur	gene-LOC112445077	Spermatid nuclear transition protein 3 OS=Ovis aries OX=9940 PE=1 SV=3
ChrX	30270434	30271168	T2T-cattle1.0-SAAS_ChrXg00329	pur	gene-MGC148328	Spermatid nuclear transition protein 3 OS=Ovis aries OX=9940 PE=1 SV=3
ChrX	30274744	30276575	T2T-cattle1.0-SAAS_ChrXg00330	pur	gene-LOC112445077	Spermatid nuclear transition protein 3 OS=Ovis aries OX=9940 PE=1 SV=3
ChrX	30279057	30280888	T2T-cattle1.0-SAAS_ChrXg00331	pur	gene-LOC112445077	Spermatid nuclear transition protein 3 OS=Ovis aries OX=9940 PE=1 SV=3
ChrX	30283370	30285201	T2T-cattle1.0-SAAS_ChrXg00332	pur	gene-LOC112445077	Spermatid nuclear transition protein 3 OS=Ovis aries OX=9940 PE=1 SV=3
ChrX	30287683	30289514	T2T-cattle1.0-SAAS_ChrXg00333	pur	gene-LOC112445077	Spermatid nuclear transition protein 3 OS=Ovis aries OX=9940 PE=1 SV=3
ChrX	30291996	30293828	T2T-cattle1.0-SAAS_ChrXg00334	pur	gene-LOC112445077	Spermatid nuclear transition protein 3 OS=Ovis aries OX=9940 PE=1 SV=3
ChrX	30296311	30298142	T2T-cattle1.0-SAAS_ChrXg00335	pur	gene-LOC112445077	Spermatid nuclear transition protein 3 OS=Ovis aries OX=9940 PE=1 SV=3
ChrX	30300625	30302455	T2T-cattle1.0-SAAS_ChrXg00336	pur	gene-LOC112445077	Spermatid nuclear transition protein 3 OS=Ovis aries OX=9940 PE=1 SV=3
ChrX	30304937	30306766	T2T-cattle1.0-SAAS_ChrXg00337	pur	gene-LOC112445077	Spermatid nuclear transition protein 3 OS=Ovis aries OX=9940 PE=1 SV=3
ChrX	30309249	30311077	T2T-cattle1.0-SAAS_ChrXg00338	pur	gene-LOC112445077	Spermatid nuclear transition protein 3 OS=Ovis aries OX=9940 PE=1 SV=3
ChrX	30313559	30315388	T2T-cattle1.0-SAAS_ChrXg00339	pur	gene-LOC112445077	Spermatid nuclear transition protein 3 OS=Ovis aries OX=9940 PE=1 SV=3
ChrX	30317871	30319695	T2T-cattle1.0-SAAS_ChrXg00340	pur	gene-LOC112445077	Spermatid nuclear transition protein 3 OS=Ovis aries OX=9940 PE=1 SV=3
ChrX	34948594	34951779	T2T-cattle1.0-SAAS_ChrXg00375	non-pur	gene-LOC112445079	Melanoma-associated antigen 10 OS=Homo sapiens OX=9606 GN=MAGEA10 PE=2 SV=2
ChrX	38395407	38396149	T2T-cattle1.0-SAAS_ChrXg00405	pur	gene-LOC768323	Spermatid nuclear transition protein 3 OS=Ovis aries OX=9940 PE=1 SV=3
ChrX	39116332	39117074	T2T-cattle1.0-SAAS_ChrXg00408	pur	gene-LOC768323	Spermatid nuclear transition protein 3 OS=Ovis aries OX=9940 PE=1 SV=3
ChrX	39910086	39910828	T2T-cattle1.0-SAAS_ChrXg00413	pur	gene-LOC768323	Spermatid nuclear transition protein 3 OS=Ovis aries OX=9940 PE=1 SV=3
ChrX	41813587	41815754	T2T-cattle1.0-SAAS_ChrXg00437	non-pur	gene-LOC101902960	Cancer/testis antigen 1 OS=Homo sapiens OX=9606 GN=CTAG1A PE=1 SV=1
ChrX	41835623	41837790	T2T-cattle1.0-SAAS_ChrXg00438	pur	gene-LOC101902960	Cancer/testis antigen 1 OS=Homo sapiens OX=9606 GN=CTAG1A PE=1 SV=1
ChrX	41857668	41859835	T2T-cattle1.0-SAAS_ChrXg00439	pur	gene-LOC101902960	Cancer/testis antigen 1 OS=Homo sapiens OX=9606 GN=CTAG1A PE=1 SV=1
ChrX	41879703	41881870	T2T-cattle1.0-SAAS_ChrXg00440	pur	gene-LOC101902960	Cancer/testis antigen 1 OS=Homo sapiens OX=9606 GN=CTAG1A PE=1 SV=1
ChrX	41901738	41903905	T2T-cattle1.0-SAAS_ChrXg00441	pur	gene-LOC101902960	Cancer/testis antigen 1 OS=Homo sapiens OX=9606 GN=CTAG1A PE=1 SV=1
ChrX	41923782	41925949	T2T-cattle1.0-SAAS_ChrXg00442	non-pur	gene-LOC101902960	Cancer/testis antigen 1 OS=Homo sapiens OX=9606 GN=CTAG1A PE=1 SV=1
ChrX	41945826	41947993	T2T-cattle1.0-SAAS_ChrXg00443	non-pur	gene-LOC101902960	Cancer/testis antigen 1 OS=Homo sapiens OX=9606 GN=CTAG1A PE=1 SV=1
ChrX	43197920	43199630	T2T-cattle1.0-SAAS_ChrXg00495	non-pur	gene-LOC112445102	EKC/KEOPS complex subunit Lage3 OS=Mus musculus OX=10090 GN=Lage3 PE=2 SV=1
ChrX	43267558	43269268	T2T-cattle1.0-SAAS_ChrXg00498	non-pur	gene-LOC112445102	EKC/KEOPS complex subunit Lage3 OS=Mus musculus OX=10090 GN=Lage3 PE=2 SV=1
ChrX	43290771	43292481	T2T-cattle1.0-SAAS_ChrXg00499	non-pur	gene-LOC112445102	EKC/KEOPS complex subunit Lage3 OS=Mus musculus OX=10090 GN=Lage3 PE=2 SV=1
ChrX	57913721	57915671	T2T-cattle1.0-SAAS_ChrXg00588	non-pur	gene-LOC783472	EKC/KEOPS complex subunit LAGE3 OS=Homo sapiens OX=9606 GN=LAGE3 PE=1 SV=2
ChrX	57917626	57920571	T2T-cattle1.0-SAAS_ChrXg00589	pur	gene-LOC101907804	EKC/KEOPS complex subunit LAGE3 OS=Homo sapiens OX=9606 GN=LAGE3 PE=1 SV=2
ChrX	58294674	58297619	T2T-cattle1.0-SAAS_ChrXg00595	non-pur	gene-LOC101907804	EKC/KEOPS complex subunit LAGE3 OS=Homo sapiens OX=9606 GN=LAGE3 PE=1 SV=2
ChrX	58299574	58301531	T2T-cattle1.0-SAAS_ChrXg00596	pur	gene-LOC783472	EKC/KEOPS complex subunit LAGE3 OS=Homo sapiens OX=9606 GN=LAGE3 PE=1 SV=2
ChrX	58450968	58452925	T2T-cattle1.0-SAAS_ChrXg00600	pur	gene-LOC783472	EKC/KEOPS complex subunit LAGE3 OS=Homo sapiens OX=9606 GN=LAGE3 PE=1 SV=2
ChrX	58454875	58457831	T2T-cattle1.0-SAAS_ChrXg00601	pur	gene-LOC101907804	EKC/KEOPS complex subunit LAGE3 OS=Homo sapiens OX=9606 GN=LAGE3 PE=1 SV=2
ChrX	61530062	61530562	T2T-cattle1.0-SAAS_ChrXg00626	non-pur	gene-LOC616431	Histone H2B 1/2 OS=Danio rerio OX=7955 GN=zgc:112234 PE=2 SV=3
ChrX	61553740	61554240	T2T-cattle1.0-SAAS_ChrXg00627	pur	gene-LOC616431	Histone H2B 1/2 OS=Danio rerio OX=7955 GN=zgc:112234 PE=2 SV=3
ChrX	61607212	61608142	T2T-cattle1.0-SAAS_ChrXg00628	pur	gene-LOC523458	Histone H2B type W-T OS=Homo sapiens OX=9606 GN=H2BFWT PE=1 SV=2
ChrX	61647109	61648039	T2T-cattle1.0-SAAS_ChrXg00629	pur	gene-LOC523458	Histone H2B type W-T OS=Homo sapiens OX=9606 GN=H2BFWT PE=1 SV=2
ChrX	61698033	61699974	T2T-cattle1.0-SAAS_ChrXg00630	non-pur	gene-LOC112445731	Zinc finger protein OZF OS=Bos taurus OX=9913 GN=ZNF146 PE=3 SV=1
ChrX	61704504	61705004	T2T-cattle1.0-SAAS_ChrXg00631	non-pur	gene-LOC616431	Histone H2B 1/2 OS=Danio rerio OX=7955 GN=zgc:112234 PE=2 SV=3
ChrX	61728124	61728624	T2T-cattle1.0-SAAS_ChrXg00632	non-pur	gene-LOC616431	Histone H2B 1/2 OS=Danio rerio OX=7955 GN=zgc:112234 PE=2 SV=3
ChrX	61733158	61735099	T2T-cattle1.0-SAAS_ChrXg00633	non-pur	gene-LOC112445731	Zinc finger protein OZF OS=Bos taurus OX=9913 GN=ZNF146 PE=3 SV=1
ChrX	61785074	61786004	T2T-cattle1.0-SAAS_ChrXg00634	non-pur	gene-LOC523458	Histone H2B type W-T OS=Homo sapiens OX=9606 GN=H2BFWT PE=1 SV=2
ChrX	61824975	61825905	T2T-cattle1.0-SAAS_ChrXg00635	pur	gene-LOC523458	Histone H2B type W-T OS=Homo sapiens OX=9606 GN=H2BFWT PE=1 SV=2
ChrX	61856346	61856846	T2T-cattle1.0-SAAS_ChrXg00636	pur	gene-LOC616431	Histone H2B 1/2 OS=Danio rerio OX=7955 GN=zgc:112234 PE=2 SV=3
ChrX	61885864	61887805	T2T-cattle1.0-SAAS_ChrXg00637	pur	gene-LOC112445731	Zinc finger protein OZF OS=Bos taurus OX=9913 GN=ZNF146 PE=3 SV=1
ChrX	61892211	61892921	T2T-cattle1.0-SAAS_ChrXg00638	pur	gene-LOC101902714	Histone H2B type W-T OS=Homo sapiens OX=9606 GN=H2BFWT PE=1 SV=2
ChrX	61916755	61917465	T2T-cattle1.0-SAAS_ChrXg00639	pur	gene-LOC101902714	Histone H2B type W-T OS=Homo sapiens OX=9606 GN=H2BFWT PE=1 SV=2
ChrX	61921872	61923813	T2T-cattle1.0-SAAS_ChrXg00640	pur	gene-LOC112445731	Zinc finger protein OZF OS=Bos taurus OX=9913 GN=ZNF146 PE=3 SV=1
ChrX	61975234	61975944	T2T-cattle1.0-SAAS_ChrXg00641	pur	gene-LOC101902714	Histone H2B type W-T OS=Homo sapiens OX=9606 GN=H2BFWT PE=1 SV=2
ChrX	61980357	61982298	T2T-cattle1.0-SAAS_ChrXg00642	pur	gene-LOC112445731	Zinc finger protein OZF OS=Bos taurus OX=9913 GN=ZNF146 PE=3 SV=1
ChrX	62544353	62567230	T2T-cattle1.0-SAAS_ChrXg00653	pur	gene-BEX4	Protein BEX4 OS=Homo sapiens OX=9606 GN=BEX4 PE=1 SV=1
ChrX	62645372	62668238	T2T-cattle1.0-SAAS_ChrXg00654	non-pur	gene-BEX4	Protein BEX4 OS=Homo sapiens OX=9606 GN=BEX4 PE=1 SV=1
ChrX	63296811	63303723	T2T-cattle1.0-SAAS_ChrXg00668	non-pur	gene-LOC785244	Nuclear RNA export factor 3 OS=Homo sapiens OX=9606 GN=NXF3 PE=1 SV=1
ChrX	63497684	63504591	T2T-cattle1.0-SAAS_ChrXg00671	pur	gene-LOC785244	Nuclear RNA export factor 3 OS=Homo sapiens OX=9606 GN=NXF3 PE=1 SV=1
ChrX	82972540	82973306	T2T-cattle1.0-SAAS_ChrXg00766	pur	gene-ZCCHC13	Cellular nucleic acid-binding protein OS=Rattus norvegicus OX=10116 GN=Cnbp PE=2 SV=1
ChrX	83061464	83073597	T2T-cattle1.0-SAAS_ChrXg00767	non-pur	gene-LOC781152	P antigen family member 3 OS=Homo sapiens OX=9606 GN=PAGE3 PE=1 SV=1
ChrX	88242571	88246647	T2T-cattle1.0-SAAS_ChrXg00808	pur	gene-MGC152340	Uncharacterized protein CXorf49 homolog OS=Bos taurus OX=9913 PE=2 SV=1
ChrX	88362773	88366849	T2T-cattle1.0-SAAS_ChrXg00809	non-pur	gene-MGC152340	Uncharacterized protein CXorf49 homolog OS=Bos taurus OX=9913 PE=2 SV=1
ChrX	88478672	88482760	T2T-cattle1.0-SAAS_ChrXg00810	pur	gene-MGC152340	Uncharacterized protein CXorf49 homolog OS=Bos taurus OX=9913 PE=2 SV=1
ChrX	88491449	88495521	T2T-cattle1.0-SAAS_ChrXg00811	pur	gene-MGC152340	Uncharacterized protein CXorf49 homolog OS=Bos taurus OX=9913 PE=2 SV=1
ChrX	88714979	88719025	T2T-cattle1.0-SAAS_ChrXg00813	pur	gene-MGC152340	Uncharacterized protein CXorf49 homolog OS=Bos taurus OX=9913 PE=2 SV=1
ChrX	97410633	97414682	T2T-cattle1.0-SAAS_ChrXg00928	non-pur	gene-LOC100138998	Casein kinase I isoform beta OS=Bos taurus OX=9913 GN=CSNK1B PE=2 SV=1
ChrX	97476403	97480455	T2T-cattle1.0-SAAS_ChrXg00929	pur	gene-LOC100138998	Casein kinase I isoform beta OS=Bos taurus OX=9913 GN=CSNK1B PE=2 SV=1
ChrX	98224581	98235379	T2T-cattle1.0-SAAS_ChrXg00934	non-pur	gene-SSX5	Protein SSX1 OS=Homo sapiens OX=9606 GN=SSX1 PE=1 SV=2
ChrX	98261105	98271903	T2T-cattle1.0-SAAS_ChrXg00935	pur	gene-SSX5	Protein SSX1 OS=Homo sapiens OX=9606 GN=SSX1 PE=1 SV=2
ChrX	98297629	98308427	T2T-cattle1.0-SAAS_ChrXg00936	non-pur	gene-SSX5	Protein SSX1 OS=Homo sapiens OX=9606 GN=SSX1 PE=1 SV=2
ChrX	101892978	101898344	T2T-cattle1.0-SAAS_ChrXg00995	pur	gene-LOC112445531	P antigen family member 3 OS=Homo sapiens OX=9606 GN=PAGE3 PE=1 SV=1
ChrX	102109831	102115200	T2T-cattle1.0-SAAS_ChrXg00998	pur	gene-LOC112445531	P antigen family member 3 OS=Homo sapiens OX=9606 GN=PAGE3 PE=1 SV=1
ChrX	102396198	102401564	T2T-cattle1.0-SAAS_ChrXg01002	pur	gene-LOC101904674	P antigen family member 3 OS=Homo sapiens OX=9606 GN=PAGE3 PE=1 SV=1
ChrX	102428648	102440796	T2T-cattle1.0-SAAS_ChrXg01003	pur	gene-LOC781152	P antigen family member 3 OS=Homo sapiens OX=9606 GN=PAGE3 PE=1 SV=1
ChrX	102902591	102907941	T2T-cattle1.0-SAAS_ChrXg01011	pur	gene-LOC101904674	P antigen family member 3 OS=Homo sapiens OX=9606 GN=PAGE3 PE=1 SV=1
ChrX	110436678	110438946	T2T-cattle1.0-SAAS_ChrXg01071	non-pur	gene-LOC112445444	Germ cell-less protein-like 2 OS=Mus musculus OX=10090 GN=Gmcl2 PE=2 SV=2
ChrX	110588907	110591175	T2T-cattle1.0-SAAS_ChrXg01072	pur	gene-LOC112445444	Germ cell-less protein-like 2 OS=Mus musculus OX=10090 GN=Gmcl2 PE=2 SV=2
ChrX	127169207	127174508	T2T-cattle1.0-SAAS_ChrXg01157	pur	gene-LOC107132081	Melanoma-associated antigen B4 OS=Homo sapiens OX=9606 GN=MAGEB4 PE=1 SV=1
ChrX	132282427	132284863	T2T-cattle1.0-SAAS_ChrXg01185	non-pur	gene-LOC520372	Melanoma-associated antigen B3 OS=Homo sapiens OX=9606 GN=MAGEB3 PE=2 SV=2
ChrX	135696638	135699971	T2T-cattle1.0-SAAS_ChrXg01216	non-pur	gene-DDX53	Probable ATP-dependent RNA helicase DDX43 OS=Homo sapiens OX=9606 GN=DDX43 PE=2 SV=2
ChrX	139277209	139295347	T2T-cattle1.0-SAAS_ChrXg01233	pur	gene-LOC784741	ARL14 effector protein-like OS=Homo sapiens OX=9606 GN=ARL14EPL PE=4 SV=1
ChrX	139421653	139434906	T2T-cattle1.0-SAAS_ChrXg01235	non-pur	gene-MGC134232	ARL14 effector protein-like OS=Homo sapiens OX=9606 GN=ARL14EPL PE=4 SV=1
ChrX	139537257	139555396	T2T-cattle1.0-SAAS_ChrXg01236	non-pur	gene-LOC784741	ARL14 effector protein-like OS=Homo sapiens OX=9606 GN=ARL14EPL PE=4 SV=1
ChrX	139662926	139676192	T2T-cattle1.0-SAAS_ChrXg01238	pur	gene-MGC134232	ARL14 effector protein-like OS=Homo sapiens OX=9606 GN=ARL14EPL PE=4 SV=1
ChrX	145580427	145583256	T2T-cattle1.0-SAAS_ChrXg01281	pur	gene-LOC618686	Melanoma-associated antigen B1 OS=Homo sapiens OX=9606 GN=MAGEB1 PE=1 SV=2
ChrX	145653753	145657086	T2T-cattle1.0-SAAS_ChrXg01282	pur	gene-DDX53	Probable ATP-dependent RNA helicase DDX43 OS=Homo sapiens OX=9606 GN=DDX43 PE=2 SV=2
ChrX	145807672	145810501	T2T-cattle1.0-SAAS_ChrXg01283	pur	gene-LOC618686	Melanoma-associated antigen B1 OS=Homo sapiens OX=9606 GN=MAGEB1 PE=1 SV=2
ChrX	146266168	146269451	T2T-cattle1.0-SAAS_ChrXg01285	non-pur	gene-LOC789863	Melanoma-associated antigen B1 OS=Homo sapiens OX=9606 GN=MAGEB1 PE=1 SV=2
ChrX	147083517	147086800	T2T-cattle1.0-SAAS_ChrXg01339	pur	gene-LOC789863	Melanoma-associated antigen B1 OS=Homo sapiens OX=9606 GN=MAGEB1 PE=1 SV=2
ChrX	147613031	147615860	T2T-cattle1.0-SAAS_ChrXg01340	pur	gene-LOC618686	Melanoma-associated antigen B1 OS=Homo sapiens OX=9606 GN=MAGEB1 PE=1 SV=2
ChrX	147679982	147683265	T2T-cattle1.0-SAAS_ChrXg01341	pur	gene-LOC789863	Melanoma-associated antigen B1 OS=Homo sapiens OX=9606 GN=MAGEB1 PE=1 SV=2

## Sheet: Table S10
Supplementary Table 10. Genome comparisons between ARS-UCD2.0 and T2T-cattle1.0-SAAS
	Genome feature	ARS-UCD2.0	T2T-cattle1.0-SAAS
Assembly summary	Total bases (Gb)	2.8	3.05
	Number of chromosome	31	31
	Unplaced bases (Mbp)	82.8	0
	Gap number	386	0
	Gap bases (Mbp)	28162	0
	Number of contigs	2343	31
	Contig N50 (Mbp)	26	112
Gene annotation	Number of protein-coding genes	21667	22028
	Number of genes in PURs	-	641
	Average length of protein-coding genes (kb)	43.85	51.66
	Average exons per protein-coding gene (n)	9.12	9
	Average exon length (bp)	178.25	179.4
	Average introns per protein-coding gene (n)	8.12	8
	Average intron length (bp)	5202.14	5119.32
Segmental duplications	Percentage of segmental duplications (%)	0.75	13.29
	Segmental duplication bases (Mbp)	22.5	398.7
	Number of segmental duplications	9672	80068
Repeats	Percentage of repeats (%)	43.69	48.46
	Repeat bases (Mbp)	1210495562	1477578447
	Long interspersed nuclear elements(%)	31.91	29.49
	Short interspersed nuclear elements(%)	1.82	1.86
	Long terminal repeats(%)	6.63	11.08
	Satellite(%)	3.2	4.3
	DNA(%)	0.21	0.32
	Simple repeat(%)	0.75	0.76
	Low complexity(%)	0.15	0.14
ncRNA	tRNA	2333	6682
	rRNA	16	28
	snRNA	637	770
	miRNA	2363	1033

[truncated: 21 more sheets: Table S11, Table S12, Table S13, Table S14, Table S15, Table S16, Table S17, Table S18, Table S19, Table S20, Table S21, Table S22, Table S23, Table S24, Table S25, Table S26, Table S27, Table S28, Table S29, Table S30 …]
